# Supplementary material for: Disparities in mortality among doctors in Taiwan: a 17-year follow-up study of 37 545 doctors
Source: HighWire-hosted journal article supplement (doi:10.1136/bmjopen-2011-000382), 2012-01-01
Supplement: bmjopen-2011-000382-s2.pdf [file bmjopen-2011-000382-s2.pdf]

Dear Sir or Madam,

Attached please find our revised manuscript entitled “**Disparities in Mortality among Doctors in Taiwan: A 17-year follow-up study of 37,545 Doctors**” (Manuscript ID bmjopen-2011-000382 R1) for your consideration to be published on your esteemed journal.

My colleagues and I are very grateful to your constructive comments and advice. Please also kindly express our sincere thankfulness and appreciation to all participating reviewers.

My research team has a thorough discussion and has made some revision on this version plus point-to-point responses to every comment that you have made.

Thank you. We are looking forward to hearing from you soon.

Yours sincerely,

Jung-Der Wang M.D.,Sc.D.  
Chair Professor  
Department of Public Health,

National Cheng Kung University College of Medicine  
1 University Rd., Tainan 701, Taiwan.  
Tel : +886-6-2353535 ext 5600 Fax : +886-6-2359033  
Email: [jdwang121@gmail.com](mailto:jdwang121@gmail.com)
