# Supplementary material for: Disparities in mortality among doctors in Taiwan: a 17-year follow-up study of 37 545 doctors
Source: PubMed Central journal article supplement — BMJ Open. 2012 Feb 15;2(1):e000382. doi: 10.1136/bmjopen-2011-000382 (PMC3282284; doi:10.1136/bmjopen-2011-000382), 2012-02-15
Supplement: bmjopen-2011-000382.draft_revisions.pdf [file bmjopen-2011-000382.draft_revisions.pdf]

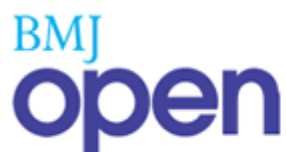

**Disparities in Mortality among Doctors in Taiwan: A 17-year follow-up study of 37,545 Doctors**

|                                  |                                                                                                                                                                                                                                                                                                                              |
|----------------------------------|------------------------------------------------------------------------------------------------------------------------------------------------------------------------------------------------------------------------------------------------------------------------------------------------------------------------------|
| Journal:                         | <i>BMJ Open</i>                                                                                                                                                                                                                                                                                                              |
| Manuscript ID:                   | bmjopen-2011-000382                                                                                                                                                                                                                                                                                                          |
| Article Type:                    | Research                                                                                                                                                                                                                                                                                                                     |
| Date Submitted by the Author:    | 26-Sep-2011                                                                                                                                                                                                                                                                                                                  |
| Complete List of Authors:        | Shang, Tung-Fu; Bureau of International Cooperation, Department of Health<br>Chen, Pau-Chung; Institute of Occupational Medicine and Industrial Hygiene, National Taiwan University College of Public Health<br>Wang, Jung-Der; Institute of Occupational Medicine and Industrial Hygiene National TAIWAN, PROVINCE OF CHINA |
| <b>Primary Subject Heading</b> : | Epidemiology                                                                                                                                                                                                                                                                                                                 |
| Keywords:                        | Doctor, Disparity, Mortality                                                                                                                                                                                                                                                                                                 |
|                                  |                                                                                                                                                                                                                                                                                                                              |

SCHOLARONE™  
Manuscripts

only

1  
2  
3  
4 **Disparities in Mortality among Doctors in Taiwan:**  
5  
6  
7 **A 17-year follow-up study of 37,545 Doctors**  
8  
9

10  
11  
12 Tung-Fu Shang<sup>1</sup>, Pau-Chung Chen<sup>2</sup>, Jung-Der Wang<sup>2,3</sup>  
13  
14

15 *<sup>1</sup> Bureau of International Cooperation, Department of Health, Executive Yuan, 36*  
16 *Tacheng St., Taipei City 103, Taiwan.*  
17

18 *<sup>2</sup> Institute of Occupational Medicine and Industrial Hygiene, National Taiwan*  
19 *University College of Public Health, 17 Xu-Zhou Rd., Taipei City 100, Taiwan*  
20  
21

22 *<sup>3</sup> Department of Public Health, National Cheng Kung University College of Medicine,*  
23 *1 University Rd., Tainan 701, Taiwan.*  
24  
25

26  
27  
28 *\*Correspondence to: Jung-Der Wang, Department of Public Health, National Cheng*  
29 *Kung University College of Medicine, 1 University Rd., Tainan 701, Taiwan.*  
30

31  
32 Tel : +886-6-2353535 ext 5600  
33

34 Fax : +886-6-2359033  
35

36 E-mail: jdwang121@gmail.com  
37  
38  
39  
40  
41  
42  
43  
44  
45  
46  
47  
48  
49  
50  
51  
52  
53  
54  
55  
56  
57  
58  
59  
60

1  
2  
3  
4 **Objectives.** We used cohort data from the registry of all doctors in Taiwan to  
5  
6 determine if the effect of health disparities exists after control of potential  
7  
8 confounding by different occupational exposures in different specialties.  
9

10  
11 **Design.** Retrospective cohort study, 1990-2006.  
12

13 **Settings.** The Taiwan Medical Association (TMA).  
14

15 **Participants.** A total of 37,545 doctors from the registry of the doctor file maintained  
16  
17 by TMA. The registry has been required by the governmental regulation for  
18  
19 verification of credentials of all practicing doctors.  
20  
21

22 **Main outcome measures.** Cause-specific standardized mortality ratios (SMRs) for  
23  
24 surgeons and anesthesiologists were compared to those of the internists. Cox's  
25  
26 proportional hazard model was constructed to explore multiple risk factors for  
27  
28 mortality, including specialties, age, gender, geographic region of practices, regional  
29  
30 health resources, ages of beginning practices, and years of beginning practice.  
31  
32

33 **Results.** The all-cause specific SMRs for surgeons and anesthesiologists were  
34  
35 marginally elevated at 1.15 (95% confidence interval: 0.98-1.34) and 1.62 (95% CI:  
36  
37 0.93-2.64) respectively. The Cox regression model showed that the anesthesiologists  
38  
39 had the highest hazard ratio (HR) of 1.97, seconded by surgeons at 1.23. Localities  
40  
41 with the doctor to population ratio lower than 1:500 were associated with an increased  
42  
43 HR of doctor mortality.  
44  
45  
46

47 **Conclusions.** The doctor to population ratio and the region of practice may influence  
48  
49 doctor's mortality. Increasing number of doctors and/or improving the practice  
50  
51 environment may be helpful in reducing the health disparities in regions with poor  
52  
53 resources.  
54  
55  
56  
57  
58  
59  
60

## Article Summary

### Article focus

To determine if the effect of health disparities exists after control of potential confounding by different occupational exposures in different specialties.

### Key messages

- All factors leading to health disparities also influence the mortality rates of healthcare providers, including doctors who practiced in such locality.
- Increasing the numbers of doctors and/or improving the practice environment may be helpful in reducing the health disparities of both the general public and doctors residing in a region with poor resources.

### Strengths and limitations of this study

#### Strengths

- The cohort data includes all practicing doctors in Taiwan.
- We use internists as the reference population for SMR calculation to minimize the potential confounding by different socioeconomic states.

#### Limitations

- Possible misclassification of self-claimed specialty may be a source of bias while comparing the mortality rates among different specialties.
- Information was limited about the hospital level and location practiced, i.e., misclassification of the region of practice without differentiating primary/referral hospital and urban/rural setting.

1  
2  
3  
4 During practices, health care providers have already been noted to suffer from certain  
5  
6 specific potential hazards like stress, radiation, anesthetic gases or agents and  
7  
8 biologically hazardous blood or body fluids, which have been documented in many  
9  
10 previous studies among radiologists, pathologists, psychiatrists, dentists, and  
11  
12 anesthesiologists<sup>1-6</sup>.

13  
14  
15 Beginning in 1995, Taiwan launched the National Health Insurance (NHI)  
16  
17 program and attempted to mitigate the health disparity among the general population  
18  
19 living in different geographic regions. The provision of universal health care coverage  
20  
21 has increased the health care demand<sup>7-8</sup>. For example, the number of outpatient visits  
22  
23 per person increased from 10.56 in 1995 to 14.88 in 2008, and the numbers of  
24  
25 hospitalized patients and outpatient visits per doctor increased as well<sup>9-10</sup>. Thus, all  
26  
27 the healthcare professionals, including doctors, have encountered a heavier workload  
28  
29 and a greater psychosocial demand than before. However, a standardized mortality  
30  
31 ratio (SMR) study using the general population as the reference for comparison did  
32  
33 not detect any increased mortality among doctors in Taiwan<sup>11</sup>.

34  
35  
36 From an alternative perspective, the association between demographic  
37  
38 characteristics of human resources in health and the health of the population served  
39  
40 has received considerable attention<sup>12-13</sup>. There is a growing evidence that the density  
41  
42 of the health workforce is directly correlated with positive health outcomes in the  
43  
44 population they serve, such as maternity mortality, infant mortality and life  
45  
46 expectancy<sup>14</sup>. Other factors like geographic location, socioeconomic states and  
47  
48 distribution of current health care resources might also affect health outcome and  
49  
50 incline to inter-correlate with each other.  
51  
52  
53  
54  
55

56  
57 As all factors leading to health disparities are affecting people within respective  
58  
59 locality<sup>15</sup>, we hypothesized that they also influence the mortality rates of healthcare  
60  
providers, including doctors who practiced in such locality. In the present study, we

1  
2  
3  
4 used the cohort data from the registry of the doctor file maintained by the Taiwan  
5  
6 Medical Association (TMA) and recruited internists, the largest group, as referents to  
7  
8 determine if the effect of health disparities exists after control of potential  
9  
10 confounding by different occupational exposures in different specialties.  
11  
12  
13  
14  
15  
16  
17  
18  
19  
20  
21  
22  
23  
24  
25  
26  
27  
28  
29  
30  
31  
32  
33  
34  
35  
36  
37  
38  
39  
40  
41  
42  
43  
44  
45  
46  
47  
48  
49  
50  
51  
52  
53  
54  
55  
56  
57  
58  
59  
60

For peer review only

## Methods

### Subjects and data collection

The retrospective cohort was established from the registry of the doctor file maintained by TMA. The registry has been required by the governmental regulation for verification of credentials of all practicing doctors. It contains the name of each individual, date and place of birth, gender, national identification number, medical school attended, date of graduation, self-designated specialty, place of practice, vital status, date of death for decedents, and date of ceasing the membership. The cohort was established beginning in January 1990 and followed up to December 2006.

Practice time was accrued until 2006, or the date of deceased or termination of membership. There were 29 decedents with incomplete information on date or month of death, of which this study assumed to be on the first day of the month or year.

Since all practicing doctors must be registered in compliance to the Doctors Act in Taiwan, the dataset is very comprehensive and accurate.

### Statistical analysis

Geographic data in doctors per 10,000 persons, per capita disposable income (US\$), education, infant mortality rate (per 1000 live births), and life expectancy at birth were collected and analyzed from national statistics of the Directorate General of Budget, Accounting and Statistics (Taiwan) in 1998, 2002, and 2006. Geographic region was categorized into northern, central, southern and eastern region following the naming of branches of Bureau of National Health Insurance. Education indicated the percentage of people aged more than 15 who attained an education level of college or above.

All-cause and cause-specific standardized mortality ratios (SMRs) were obtained by employing the personal computer version of Life Table Analysis System (LTAS.NET). The LTAS was originally developed by the National Institute for

1  
2  
3  
4 Occupational Safety and Health (NIOSH) during the 1970s and was later converted  
5  
6 for use on Windows 98/NT/2000/XP-compatible PCs. This program tabulates the  
7  
8 underlying causes of death as well as the person-years of follow-up into age-, gender-,  
9  
10 and race-specific strata, and allows users to apply internal controls as referents to  
11  
12 replace general population from vital statistics. SMRs and 95% confidence intervals  
13  
14 (CIs) were calculated using the mortality rates of 119 underlying causes of death of  
15  
16 the internists of Taiwan as the reference group. We used SAS Version 9.1 (SAS  
17  
18 institute) to edit and analyze the data. In this study, we set the significance level at  
19  
20  
21  
22  
23  $p=0.05$ .

24  
25 Cox regression analysis was conducted to determine the hazard ratios for the  
26  
27 following risk factors: age, gender, specialty, geographic region of practice, age of  
28  
29 beginning practice, calendar year of beginning practice (before or after 1995 when the  
30  
31 NHI system was established), and doctor to population ratio. The ratio between  
32  
33 doctors and population was categorized into 4 levels: larger than 1:500, from 1:500 to  
34  
35 1:700, from 1:700 to 1:900, and less than 1:900. Since the northern region of Taiwan  
36  
37 leads development for the last half a century, it was chosen to be the reference in the  
38  
39 statistical model. The covariates considered in the regression analysis were gender,  
40  
41 specialty, geographic region of practice, age of beginning practice, calendar year of  
42  
43 beginning practice, and doctor to population ratio. We applied the stepwise strategy  
44  
45 for variable selection with the significance level for entry and the significance level  
46  
47 for stay set to 0.15. Regression diagnostics were also run, including examination of  
48  
49 proportional hazard assumption, residual analysis, detection of influential cases, and  
50  
51 check for multi-co-linearity to assure the quality of analysis and goodness of fit for  
52  
53  
54  
55  
56  
57 the model.  
58  
59  
60



## Results

With the doctor to population ratio above 1:500 as the reference level, we found that a lower ratio significantly increased the hazard ratio (HR) of doctor mortality; there was also an independent effect of regional difference of higher HR for southern and eastern regions, as summarized in Table 4. The differences among localities seemed to correlate well with higher average levels of income and education, lower infant mortality rates, and longer life expectancies across Taiwan. And such disparities did not appear to have changed during the last decade (Table 1).

A total of 37,545 doctors were tabulated in the study from January 1990 to December 2006. During the above period, there were 1642 deaths among 32,713 male doctors and 44 deaths among 4822 female doctors. The overall mean age at death was  $69.88 \pm 14.28$  years old, with  $70.06 \pm 14.04$  for males and  $62.96 \pm 20.21$  for females, respectively. (Table 2) Approximately half (49.7%) of the cohort had been internists, 48.1% were practicing in the north region. Among all doctors, there were 30.8% working in the area of low doctor to population ratio. About two-thirds began their practice before 1995, and over 90% started practice at age below 40.

As for the control for socioeconomic status in the analysis, we used the internists as the reference population and found that the all cause specific SMRs for surgeons and anesthesiologists were marginally elevated with an SMR of 1.15 (95% CI: 0.98-1.34) and 1.62 (95% CI: 0.93-2.64), respectively (Table 3). Among the surgeons, the SMR of “Neoplasm of lymphatic and hematopoietic tissue” was increased but without statistical significance (SMR = 2.17, 95% CI: 0.94 to 4.28). The observed numbers of deaths from malignant neoplasm of digestive organs and peritoneum were significantly lower than corresponding expected values (SMR = 0.54,  $p < 0.05$ , 95% CI: 0.29 to 0.92). Among the anesthesiologists, the SMR of “malignant neoplasm of other and unspecified sites” was significantly increased (SMR = 8.73,  $p < 0.05$ , 95%

1  
2  
3  
4 CI: 1.06 to 31.53), although there were only 2 cases on the observed number.  
5

6 To further adjust for other risk factors, the Cox regression model was constructed  
7  
8 and the results were summarized in Table 4. The anesthesiologists appeared to show  
9  
10 the highest hazard ratios (HRs) of 1.97 (95% CI, 1.20 to 3.25), followed by surgeons  
11  
12 with a HR of 1.23 (95%CI, 1.04 to 1.46). The HR of ophthalmologists was  
13  
14 significantly lower than all other specialists, of which the HR was 0.72 (95%CI, 0.53  
15  
16 to 0.98). In addition, doctors living in the northern region and the central region  
17  
18 experienced lower HR's. And doctors who worked in the area with doctor to  
19  
20 population ratio below 1:500 showed higher mortality or HR.  
21  
22  
23

24  
25 The doctors who began practice at an older age had a higher HR of 1.12 (95%CI,  
26  
27 1.12 to 1.13) for every single year increment. Overall, doctors who began practice  
28  
29 after the implementation of NHI Program, or the year of 1995, showed a higher HR of  
30  
31 6.17 (95%CI, 4.27 to 8.92).  
32  
33  
34  
35  
36  
37  
38  
39  
40  
41  
42  
43  
44  
45  
46  
47  
48  
49  
50  
51  
52  
53  
54  
55  
56  
57  
58  
59  
60

## Discussion

Based on Cox's Model analysis, we found doctors practicing in southern and eastern regions of Taiwan suffered from statistically significant premature mortality (Table 4), and such a geographic disparity appeared to correspond to the lower life expectancy and higher infant mortality rate in Taiwan (Table 1). To our limited knowledge, this study is the first to show that doctors practicing in the area of a low doctor to population ratio or in the less resourceful regions experienced a higher HR of mortality after adjustment for gender, age of beginning practice, and specialties (Table 4). Since the study is conducted exclusively among doctors with the same socioeconomic status, it raises the question whether the other two main factors, occupational workload or practice environment, may have played an important role.

Lowest average income, educational level and life expectancy, and the highest infant mortality rate in Taiwan were found in the eastern region (Table 1).

Traditionally, this mountainous region impedes transportation tremendously, and plays a significant role in reduced healthcare accessibility for people, including health care providers themselves. Although the doctor to population ratio has improved since the promulgation of Medical Care Act in 1986 and implementation of NHI in 1995, doctors living in this region still suffer from a higher HR. It may indicate that the health disparity still exists. Moreover, in analyzing the central and southern regions, where similar levels of the average income and the education were found, a significantly increased hazard ratio was detected in the southern region only. As noted in Table 1, the doctor to population ratio has been consistently found to be lower in the southern region compared with those of the northern and central regions. These findings indicate persistent health disparities in different regions of Taiwan, and suggest that occupational workloads might play some role in view of the increased mortality of doctors.

1  
2  
3  
4 In a previous study, we found that the overall and cause-specific SMRs of doctors  
5  
6 in Taiwan were less than 0.34 for different specialties<sup>11</sup>, which may have been  
7  
8 confounded by using the general population as the referents for comparison<sup>16</sup>. In this  
9  
10 study, we use internists as the reference population for SMR calculation to minimize  
11  
12 the potential confounding by different socioeconomic states (Table 3). Although no  
13  
14 increased mortality was found among radiologists, pathologists, and psychiatrists, as  
15  
16 reported from other countries<sup>2-4</sup>, we detected significantly increased HRs for surgeons  
17  
18 and anesthesiologists (Table 4). A further analysis only detected slightly elevated  
19  
20 SMR for malignant neoplasm of lymphatic and hematopoietic tissues among surgeons,  
21  
22 which appeared to corroborate the hazards of operation room reported by others<sup>17</sup>.  
23  
24 However, the trend was less apparent because of the small sample size of  
25  
26 anesthesiologists. Since the current mortality data in Taiwan only allowed for coding  
27  
28 single underlying cause of death, it may further decrease the power of detection of  
29  
30 occupational related illnesses.  
31  
32  
33  
34  
35

36 Our study also demonstrated the HR of mortality was higher in the group  
37  
38 beginning their practice since 1995, when the National Health Insurance system was  
39  
40 implemented. This group belonged to a younger generation of doctors, who might  
41  
42 possibly suffer from highly stressed work during their practice<sup>18</sup>. Such a stress might  
43  
44 arise from their clinical training program or the newly implemented health policy.  
45  
46 However, the cohort was established during 1990-2006, which may have imposed a  
47  
48 selection of healthy survivors among the doctors. They began their practice before  
49  
50 1995 in comparison with those who entered the workforce after 1995. Thus, more  
51  
52 study is needed to explore the above hypothesis.  
53  
54  
55  
56

57 Several limitations of this study should be noted. Firstly, possible  
58  
59 misclassification of self-claimed specialty may be a source of bias while comparing  
60  
the mortality rates among different specialties. For instance, a surgeon shifted to

1  
2  
3  
4 general practice after retiring from a medical center may result in overestimation of  
5  
6 the practice duration and possible underestimation of the effect of specialty. Thus, the  
7  
8 higher HR's among surgeons and anesthesiologists may need to be further studied for  
9  
10 clarification. Secondly, information was limited about the hospital level and location  
11  
12 practiced, i.e., misclassification of the region of practice without differentiating  
13  
14 primary/referral hospital and urban/rural setting. Thus, we had to assume that it might  
15  
16 be a random effect and only lead to the null or under-estimation.  
17  
18

19  
20 In conclusion, disparities both in the geographic region of doctor's practice and the  
21  
22 ratio of doctor to population regionally are the primary determinants to the HR of  
23  
24 doctor mortality. Thus, we recommend increasing the number of doctors and  
25  
26 improving the practice environment of eastern and southern regions of Taiwan, which  
27  
28 may possibly mitigate the health disparities among doctors and people. Further, more  
29  
30 studies are needed to explore and reduce the potential hazards among workplaces of  
31  
32 anesthesiologists and surgeons in Taiwan.  
33  
34  
35  
36  
37  
38  
39  
40  
41  
42  
43  
44  
45  
46  
47  
48  
49  
50  
51  
52  
53  
54  
55  
56  
57  
58  
59  
60

## Acknowledgements

The authors express sincere appreciation to Taiwan Medical Association (TMA) for the maintenance of the relevant database. We also thank Dr. Fu-Chang Hu for his assistance in data analysis using SAS. The study was partially supported by a grant from the National Science Council of the Executive Yuan, Taiwan (No. NSC 99-2628-B-006-036-MY3). The sponsors had no role in the study design, data collection, data analyses, the interpretation of data, the writing of the report, or the decision to submit the article for publication.

## Contribution statement

The first author, Dr. Tung-Fu Shang, has written the first draft, full access to all the data in the study and takes responsibility for the integrity of the data and the accuracy of the data analysis. And, Dr. Pau-Chung Chen has reviewed the data and dealt with statistics. Dr. Jung-Der Wang is the guarantor.

## Competing interests:

All authors of this manuscript indicate no conflicts of interest and have complied with the Principles of Ethical Practice of Public Health.

## Funding

The study was partially supported by a grant from the National Science Council of the Executive Yuan, Taiwan (No. NSC 99-2628-B-006-036-MY3). The sponsors had no role in the study design, data collection, data analyses, the interpretation of data, the writing of the report, or the decision to submit the article for publication.

## References

1. Alexander BH, Checkoway H, Nagahama SI, et al. Cause-specific mortality risks of anesthesiologists. *Anesthesiology* 2000;93(4):922-30.
2. Rich CL, Pitts FN. Suicide by psychiatrists: a study of medical specialists among 18,730 consecutive physician deaths during a five-year period, 1967-72. *J Clin Psychiatry* 1980;41:261-3.
3. Hall A, Harrington JM, Aw TC. Mortality study of British pathologists. *Am J Ind Med* 1991;20:83-9.
4. Logue JN, Barrick MK, Jessup GL, Jr. Mortality of radiologists and pathologists in the Radiation Registry of Physicians. *J Occup Med* 1986;28(2):91-9.
5. Hill GB, Harvey W. The mortality of dentists. *Br Dent J* 1972;132:179-82.
6. Doll R, Peto R. Mortality among doctors in different occupations. *BMJ* 1977;1(6074):1433-6.
7. Cheng SH, Chiang TL. The Effect of Universal Health Insurance on Health Care Utilization in Taiwan. Results from a Natural Experiment. *JAMA* 1997;278:89-93.
8. Lu JR, Hsiao WC. Does Universal Health Insurance Make Health Care Unaffordable? Lessons from Taiwan. *Health Aff (Millwood)* 2003;22(3):77-88.
9. National Health Insurance. Statistical Annual Report of Medical Care. Taipei: The ROC Department of Health; 2003.
10. Department of Health. Taiwan Public Health Report 2009. Taipei: The ROC Department of Health; 2010.
11. Shang TF, Chen PC, Wang JD. Mortality of Doctors in Taiwan, 1990-2006. *Occup Med (Lond)* 2011;61(1):29-32.
12. Anand S, Barnighausen T. Human resources and health outcomes: cross-country econometric study. *Lancet* 2004;364:1603-09.
13. Anyangwe SC, Mtonga C. Inequities in the Global Health Workforce: The Greatest Impediment to Health in Sub-Saharan Africa. *Int J Environ Res Public Health* 2007;4:93-100.
14. Högberg U. The World Health Report 2005: "make every mother and child count" - including Africans. *Scand J Public Health* 2005;33:409-11.
15. Division of Health Statistics. Mortality rate by local. Taipei: The ROC Department of Health; 2008.
16. Wang JD, Miettinen OS. Occupational mortality studies: principles of validity. *Scand J Work Environ Health* 1982;8:153-8.
17. Bruce DL, Eide KA, Linde HW, et al. Causes of death among anesthesiologists: A 20-year survey. *Anesthesiology* 1968;29:565-69.

1  
2  
3  
4  
5  
6  
7  
8  
9  
10  
11  
12  
13  
14  
15  
16  
17  
18  
19  
20  
21  
22  
23  
24  
25  
26  
27  
28  
29  
30  
31  
32  
33  
34  
35  
36  
37  
38  
39  
40  
41  
42  
43  
44  
45  
46  
47  
48  
49  
50  
51  
52  
53  
54  
55  
56  
57  
58  
59  
60

18. British Medical Association. The morbidity and mortality of the medical profession. A literature review and suggestions for future research. London: British Medical Association; 1993.

For peer review only



**Table 1 -- Geographic disparities in doctors per 10,000 persons, per capita disposable income (US\$), education, infant mortality rate (per 1000 live births), and life expectancy at birth in 1998, 2002, and 2006.**

| Region          | Doctors per 10,000 persons |      |      | Per capita disposable income |        |        | Education <sup>§</sup> |      |      | Infant mortality rate |      |      | Life expectancy |      |      |
|-----------------|----------------------------|------|------|------------------------------|--------|--------|------------------------|------|------|-----------------------|------|------|-----------------|------|------|
|                 | 1998                       | 2002 | 2006 | 1998                         | 2002   | 2006   | 1998                   | 2002 | 2006 | 1998                  | 2002 | 2006 | 1998            | 2002 | 2006 |
| <b>Northern</b> | 14.7                       | 16.5 | 17.4 | 8394.8                       | 8912.6 | 9853.0 | 24.8                   | 30.1 | 36.1 | 6.2                   | 4.9  | 4.4  | 77.4            | 78.6 | 79.5 |
| <b>Central</b>  | 14.1                       | 16.5 | 18.3 | 7044.2                       | 6940.0 | 7817.6 | 18.8                   | 23.2 | 28.6 | 6.9                   | 5.8  | 4.5  | 75.1            | 77.0 | 77.6 |
| <b>Southern</b> | 12.9                       | 14.5 | 16.5 | 6928.8                       | 7157.5 | 7891.2 | 18.4                   | 22.8 | 27.7 | 6.4                   | 5.4  | 4.8  | 74.7            | 76.0 | 76.5 |
| <b>Eastern</b>  | 13.3                       | 15.4 | 18.3 | 6542.2                       | 6683.0 | 7987.6 | 11.8                   | 14.4 | 20.0 | 12.4                  | 8.3  | 7.6  | 70.6            | 72.9 | 73.2 |

**§Education:** The percentage of people aged more than 15 attained an education level of college or above

Table 2 -- Characteristics of Taiwan doctors included in the study from 1990 to 2006.

|                                  | Taiwan doctors |                   | Deceased doctors |                   |
|----------------------------------|----------------|-------------------|------------------|-------------------|
|                                  | No. (%)        | mean censored age | No. (%)          | mean age at death |
| <b>Total</b>                     | 37,545 (100)   | 46.41±14.47       | 1686 (100)       | 69.88±14.28       |
| <b>Status</b>                    |                |                   |                  |                   |
| Alive                            | 35,859 (95.5)  | 45.31±13.51       |                  |                   |
| Deceased                         | 1686 (4.5)     |                   |                  | 69.88±14.28       |
| <b>Sex</b>                       |                |                   |                  |                   |
| Male                             | 32,722 (87.2)  | 47.68±14.56       | 1642 (97.4)      | 70.06±14.04       |
| Female                           | 4823 (12.8)    | 37.81±10.30       | 44 (2.6)         | 62.96±20.21       |
| <b>Age of beginning practice</b> |                |                   |                  |                   |
| age<30                           | 29,753 (79.2)  | 43.39±11.99       | 566 (33.6)       | 59.03±14.98       |
| 30≤age<40                        | 5573 (14.8)    | 52.28±14.10       | 472 (28.0)       | 73.81±11.92       |
| age≥40                           | 2219 (5.9)     | 74.24±10.91       | 648 (38.4)       | 76.37±8.62        |
| <b>Specialty</b>                 |                |                   |                  |                   |
| Surgeon                          | 4571 (12.2)    | 45.20±13.20       | 161 (9.5)        | 65.83±14.54       |
| Internist                        | 18,664 (49.7)  | 48.76±15.97       | 1190 (70.1)      | 71.92±12.70       |
| Dermatologist                    | 901 (2.4)      | 43.00±12.92       | 35 (2.1)         | 69.79±16.25       |
| Otolaryngologist                 | 2000 (5.3)     | 44.28±11.99       | 45 (2.7)         | 65.46±14.36       |
| Ophthalmologist                  | 1584 (4.2)     | 44.72±12.33       | 42 (2.5)         | 72.28±19.56       |
| Pathologist                      | 414 (1.1)      | 42.21±12.04       | 5 (0.3)          | 49.78±10.87       |

|                  |            |             |          |             |
|------------------|------------|-------------|----------|-------------|
| Pediatrician     | 2883 (7.7) | 42.35±11.59 | 54 (3.2) | 66.32±17.12 |
| Psychiatrist     | 1214 (3.2) | 40.37±11.81 | 21 (1.2) | 61.85±20.52 |
| Radiologist      | 1076 (2.9) | 41.59±11.79 | 18 (1.1) | 63.23±18.18 |
| Obstetrician     | 2278 (6.1) | 48.84±12.10 | 85 (5.0) | 63.48±14.44 |
| Orthopedist      | 1128 (3.0) | 43.56±11.07 | 14 (0.8) | 58.78±18.32 |
| Anesthesiologist | 832 (2.2)  | 40.91±10.23 | 16 (0.9) | 45.21±15.67 |

### Region

|          |               |             |            |             |
|----------|---------------|-------------|------------|-------------|
| Northern | 18,046 (48.1) | 45.71±14.52 | 659 (39.1) | 68.90±14.32 |
| Central  | 7054 (18.8)   | 46.25±13.70 | 300 (17.8) | 70.04±15.58 |
| Southern | 11,376 (30.3) | 47.64±14.81 | 667 (39.6) | 70.97±13.57 |
| Eastern  | 1069 (2.8)    | 46.24±14.12 | 60 (3.6)   | 67.67±13.96 |

### Doctor-population ratio

|                    |               |             |            |             |
|--------------------|---------------|-------------|------------|-------------|
| > 1 : 500          | 17,185 (45.8) | 45.29±14.34 | 620 (36.8) | 68.21±15.11 |
| 1 : 700 to 1 : 500 | 6429 (17.1)   | 45.55±14.50 | 285 (16.9) | 69.71±14.19 |
| 1 : 900 to 1 : 700 | 11,233 (29.9) | 47.91±14.21 | 589 (34.9) | 70.92±13.61 |
| < 1 : 900          | 2698 (7.2)    | 51.08±14.53 | 192 (11.4) | 71.90±13.02 |

### Years of practice

|             |               |             |             |             |
|-------------|---------------|-------------|-------------|-------------|
| Before 1995 | 24,337 (64.8) | 53.62±12.71 | 1640 (97.3) | 70.60±13.52 |
| After 1995  | 13,208 (35.2) | 33.13±5.06  | 46 (2.7)    | 44.28±16.86 |

**Table 3 -- The observed number of deaths and cause specific SMRs (standardized mortality ratios) for surgeons and anesthesiologists, using internists of Taiwan as the reference group.**

| Causes of death                                | Surgeon |      |                    | Anesthesiologist |      |                 |
|------------------------------------------------|---------|------|--------------------|------------------|------|-----------------|
|                                                | O       | SMR  | 95%CI <sup>§</sup> | O                | SMR  | 95%CI           |
| <b>All causes</b>                              | 161     | 1.15 | ( 0.98 - 1.34 )    | 16               | 1.62 | (0.93 - 2.64)   |
| <b>All malignant neoplasm</b>                  | 37      | 0.84 | ( 0.59 - 1.16 )    | 5                | 1.57 | ( 0.51 - 3.66)  |
| <b>(MN)</b>                                    |         |      |                    |                  |      |                 |
| MN of digestive organs and peritoneum          | 13      | 0.54 | ( 0.29 - 0.92 )    | 2                | 1.18 | ( 0.14 - 4.26)  |
| MN of respiratory system                       | 11      | 1.16 | ( 0.58 - 2.07)     | 0                | 0.00 | ( 0.00 - 6.56)  |
| MN of urinary organs                           | 2       | 1.05 | ( 0.13 - 3.79)     | 0                | 0.00 | ( 0.00 - 20.42) |
| Neoplasm of lymphatic and hematopoietic tissue | 8       | 2.17 | ( 0.94 - 4.28)     | 1                | 3.41 | ( 0.09 - 19.03) |
| MN of other and unspecified sites              | 1       | 0.48 | ( 0.01 - 2.68)     | 2                | 8.73 | ( 1.06 - 31.53) |
| <b>Cerebrovascular disease</b>                 | 7       | 0.59 | ( 0.24 - 1.22)     | 3                | 3.95 | ( 0.82 - 11.55) |
| <b>Heart disease</b>                           | 9       | 0.83 | ( 0.38 - 1.57)     | 0                | 0.00 | ( 0.00 - 7.34)  |
| <b>Accidents</b>                               | 11      | 1.81 | ( 0.90 - 3.24)     | 1                | 1.58 | ( 0.04 - 8.79)  |
| <b>Diabetes mellitus</b>                       | 8       | 1.49 | ( 0.65 - 2.94)     | 1                | 1.84 | ( 0.05 - 10.25) |
| <b>Chronic liver disease</b>                   | 7       | 1.60 | ( 0.64 - 3.30)     | 0                | 0.00 | ( 0.00 - 13.75) |
| <b>Kidney disease</b>                          | 1       | 0.36 | ( 0.01 - 2.01)     | 0                | 0.00 | ( 0.00 - 21.26) |
| <b>Pneumonia</b>                               | 5       | 0.97 | ( 0.32 - 2.27)     | 0                | 0.00 | ( 0.00 - 12.23) |

|                             |   |      |                |   |      |                 |
|-----------------------------|---|------|----------------|---|------|-----------------|
| <b>Suicide</b>              | 3 | 1.36 | ( 0.28 - 3.98) | 1 | 3.34 | ( 0.08 -18.60)  |
| <b>Chronic lung disease</b> | 4 | 2.19 | ( 0.60 - 5.60) | 0 | 0.00 | ( 0.00 -116.04) |
| <b>Hypertensive disease</b> | 2 | 1.45 | ( 0.18 - 5.25) | 0 | 0.00 | ( 0.00 - 30.76) |

§ CI: confidence interval

For peer review only

**Table 4 -- Hazard ratios with 95% CI (confidence interval) estimated through Cox regression model to control relevant risk factors on mortality among Taiwan doctors from 1990 to 2006.**

| <b>Covariate</b>                 | <b>Hazard ratio</b> | <b>95% CI</b> |
|----------------------------------|---------------------|---------------|
| <b>Age of beginning practice</b> |                     |               |
|                                  | 1.12                | 1.12-1.13     |
| <b>Gender</b>                    |                     |               |
| Female/male                      | 0.76                | 0.56-1.02     |
| <b>Specialty</b>                 |                     |               |
| Dermatologist / Internist        | 1.19                | 0.85-1.67     |
| Otolaryngologist / Internist     | 0.85                | 0.63-1.15     |
| Ophthalmologist / Internist      | 0.72                | 0.53-0.98     |
| Pathologist/ Internist           | 0.81                | 0.33-1.94     |
| Pediatrician / Internist         | 0.91                | 0.69-1.20     |
| Psychiatrist / Internist         | 0.81                | 0.52-1.24     |
| Radiologist / Internist          | 0.87                | 0.55-1.39     |
| Surgeon / Internist              | 1.23                | 1.04-1.46     |
| Obstetrician / Internist         | 1.19                | 0.95-1.50     |
| Orthopedist / Internist          | 0.75                | 0.44-1.27     |
| Anesthesiologists/ Internist     | 1.97                | 1.20-3.25     |
| <b>Region</b>                    |                     |               |
| Central / Northern               | 1.12                | 0.97-1.29     |
| Southern / Northern              | 1.30                | 1.17-1.45     |
| Eastern / Northern               | 1.68                | 1.28-2.20     |

| <b>Doctor-population ratio</b>    |      |           |
|-----------------------------------|------|-----------|
| 1 : 700 to 1 : 500 / >1 : 500     | 1.23 | 1.06-1.42 |
| 1 : 900 to 1 : 700 / >1 : 500     | 1.20 | 1.06-1.34 |
| <1 : 900 / >1 : 500               | 1.18 | 1.00-1.39 |
| <b>Year of beginning practice</b> |      |           |
| After 1995/ Before1995            | 6.17 | 4.27-8.92 |

For peer review only

**WHAT IS ALREADY KNOWN ON THIS TOPIC**

All factors leading to health disparities are affecting people within respective locality.

**WHAT THIS STUDY ADDS**

All factors leading to health disparities also influence the mortality rates of healthcare providers, including doctors who practiced in such locality.

Increasing the numbers of doctors and/or improving the practice environment may be helpful in reducing the health disparities of both the general public and doctors residing in a region with poor resources.

For peer review only



STROBE 2007 (v4) Statement—Checklist of items that should be included in reports of *cohort studies*

| Section/Topic                | Item # | Recommendation                                                                                                                                                                       | Reported on page # |
|------------------------------|--------|--------------------------------------------------------------------------------------------------------------------------------------------------------------------------------------|--------------------|
| Title and abstract           | 1      | (a) Indicate the study's design with a commonly used term in the title or the abstract                                                                                               | 1-2                |
|                              |        | (b) Provide in the abstract an informative and balanced summary of what was done and what was found                                                                                  | 2                  |
| <b>Introduction</b>          |        |                                                                                                                                                                                      | <b>4-5</b>         |
| Background/rationale         | 2      | Explain the scientific background and rationale for the investigation being reported                                                                                                 | 4                  |
| Objectives                   | 3      | State specific objectives, including any prespecified hypotheses                                                                                                                     | 4-5                |
| <b>Methods</b>               |        |                                                                                                                                                                                      | <b>6-7</b>         |
| Study design                 | 4      | Present key elements of study design early in the paper                                                                                                                              | 6                  |
| Setting                      | 5      | Describe the setting, locations, and relevant dates, including periods of recruitment, exposure, follow-up, and data collection                                                      | 6                  |
| Participants                 | 6      | (a) Give the eligibility criteria, and the sources and methods of selection of participants. Describe methods of follow-up                                                           | 6                  |
|                              |        | (b) For matched studies, give matching criteria and number of exposed and unexposed                                                                                                  | 6                  |
| Variables                    | 7      | Clearly define all outcomes, exposures, predictors, potential confounders, and effect modifiers. Give diagnostic criteria, if applicable                                             | 6-7                |
| Data sources/<br>measurement | 8*     | For each variable of interest, give sources of data and details of methods of assessment (measurement). Describe comparability of assessment methods if there is more than one group | 6-7                |
| Bias                         | 9      | Describe any efforts to address potential sources of bias                                                                                                                            | 6-7                |
| Study size                   | 10     | Explain how the study size was arrived at                                                                                                                                            | 6                  |
| Quantitative variables       | 11     | Explain how quantitative variables were handled in the analyses. If applicable, describe which groupings were chosen and why                                                         | 6-7                |
| Statistical methods          | 12     | (a) Describe all statistical methods, including those used to control for confounding                                                                                                | 6-7                |
|                              |        | (b) Describe any methods used to examine subgroups and interactions                                                                                                                  | 6-7                |
|                              |        | (c) Explain how missing data were addressed                                                                                                                                          | 6                  |
|                              |        | (d) If applicable, explain how loss to follow-up was addressed                                                                                                                       |                    |
|                              |        | (e) Describe any sensitivity analyses                                                                                                                                                |                    |
| <b>Results</b>               |        |                                                                                                                                                                                      | <b>8-9</b>         |

|                          |     |                                                                                                                                                                                                                                                                                                                                                                                                               |             |
|--------------------------|-----|---------------------------------------------------------------------------------------------------------------------------------------------------------------------------------------------------------------------------------------------------------------------------------------------------------------------------------------------------------------------------------------------------------------|-------------|
| Participants             | 13* | (a) Report numbers of individuals at each stage of study—eg numbers potentially eligible, examined for eligibility, confirmed eligible, included in the study, completing follow-up, and analysed<br>(b) Give reasons for non-participation at each stage<br>(c) Consider use of a flow diagram                                                                                                               | 8           |
| Descriptive data         | 14* | (a) Give characteristics of study participants (eg demographic, clinical, social) and information on exposures and potential confounders<br>(b) Indicate number of participants with missing data for each variable of interest<br>(c) Summarise follow-up time (eg, average and total amount)                                                                                                                | 8<br>8<br>8 |
| Outcome data             | 15* | Report numbers of outcome events or summary measures over time                                                                                                                                                                                                                                                                                                                                                | 8-9         |
| Main results             | 16  | (a) Give unadjusted estimates and, if applicable, confounder-adjusted estimates and their precision (eg, 95% confidence interval). Make clear which confounders were adjusted for and why they were included<br>(b) Report category boundaries when continuous variables were categorized<br>(c) If relevant, consider translating estimates of relative risk into absolute risk for a meaningful time period | 8-9<br>8-9  |
| Other analyses           | 17  | Report other analyses done—eg analyses of subgroups and interactions, and sensitivity analyses                                                                                                                                                                                                                                                                                                                | 8-9         |
| <b>Discussion</b>        |     |                                                                                                                                                                                                                                                                                                                                                                                                               | 10-11       |
| Key results              | 18  | Summarise key results with reference to study objectives                                                                                                                                                                                                                                                                                                                                                      | 10-11       |
| <b>Limitations</b>       |     |                                                                                                                                                                                                                                                                                                                                                                                                               | 11-12       |
| Interpretation           | 20  | Give a cautious overall interpretation of results considering objectives, limitations, multiplicity of analyses, results from similar studies, and other relevant evidence                                                                                                                                                                                                                                    | 11-12       |
| Generalisability         | 21  | Discuss the generalisability (external validity) of the study results                                                                                                                                                                                                                                                                                                                                         | 11-12       |
| <b>Other information</b> |     |                                                                                                                                                                                                                                                                                                                                                                                                               | 13          |
| Funding                  | 22  | Give the source of funding and the role of the funders for the present study and, if applicable, for the original study on which the present article is based                                                                                                                                                                                                                                                 | 13          |

\*Give information separately for cases and controls in case-control studies and, if applicable, for exposed and unexposed groups in cohort and cross-sectional studies.

**Note:** An Explanation and Elaboration article discusses each checklist item and gives methodological background and published examples of transparent reporting. The STROBE checklist is best used in conjunction with this article (freely available on the Web sites of PLoS Medicine at <http://www.plosmedicine.org/>, Annals of Internal Medicine at <http://www.annals.org/>, and Epidemiology at <http://www.epidem.com/>). Information on the STROBE Initiative is available at [www.strobe-statement.org](http://www.strobe-statement.org).

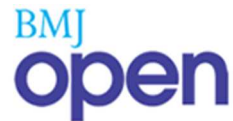

**Disparities in Mortality among Doctors in Taiwan: A 17-year follow-up study of 37,545 Doctors**

|                                 |                                                                                                                                                                                                                                                                                                                                 |
|---------------------------------|---------------------------------------------------------------------------------------------------------------------------------------------------------------------------------------------------------------------------------------------------------------------------------------------------------------------------------|
| Journal:                        | <i>BMJ Open</i>                                                                                                                                                                                                                                                                                                                 |
| Manuscript ID:                  | bmjopen-2011-000382.R1                                                                                                                                                                                                                                                                                                          |
| Article Type:                   | Research                                                                                                                                                                                                                                                                                                                        |
| Date Submitted by the Author:   | 10-Jan-2012                                                                                                                                                                                                                                                                                                                     |
| Complete List of Authors:       | Shang, Tung-Fu; Bureau of International Cooperation, Department of Health<br>Chen, Pau-Chung; Institute of Occupational Medicine and Industrial Hygiene, National Taiwan University College of Public Health<br>Wang, Jung-Der; Institute of Occupational Medicine and Industrial Hygiene<br>National TAIWAN, PROVINCE OF CHINA |
| <b>Primary Subject Heading</b>: | Epidemiology                                                                                                                                                                                                                                                                                                                    |
| Secondary Subject Heading:      | Occupational and environmental medicine, Public health                                                                                                                                                                                                                                                                          |
| Keywords:                       | Doctor, Disparity, Mortality                                                                                                                                                                                                                                                                                                    |
|                                 |                                                                                                                                                                                                                                                                                                                                 |

SCHOLARONE™  
Manuscripts

## RESPONSE TO THE MANAGING EDITOR AND REVIEWERS

### For the managing editor

**From the managing editor:**

**Please ensure that all authors meet the ICMJE criteria:**

**[http://www.icmje.org/ethical\\_1author.html](http://www.icmje.org/ethical_1author.html).**

**Any authors that do not meet these criteria should be included in the acknowledgements. For example Dr Jung-Der Wang is the 'guarantor' of the paper but does not appear to have been involved in the research.**

**Response:** Thank you for your comment. It is probably out of some errors made in the process of submitting this manuscript that might have caused you misunderstanding. In fact, I have contributed to the study design, data analysis, and finalize the contents of the manuscript together with the first author, Dr. Shang and second author, Dr. Chen. To avoid confusion, I have revised the “Contribution statement” (page 14) as follows:

### **Contribution statement**

The first author, Dr. Tung-Fu Shang, has acquired the dataset, designed the study together with Dr. Wang (the corresponding author), conducted the analysis under the full supervision and discussion with Drs. Chen and Wang, written the first draft, and all three participated in the revision of the later drafts until the final one.

Dr. Shang has access to all the data in the study and takes responsibility for the integrity of the data. Together with all co-authors, we shall be responsible for the accuracy of the data analysis, interpretation of the results.

## **For Reviewer**

### **Comment # 1**

**My main objection is that a paper that presents geographic location as a possible cause of premature death among doctors does not discuss the possible causes of choosing a location, or moving from one location to another.**

**Response:** The authors would like to thank the reviewer for your comment. The retrospective cohort was established from the registry of the doctor file maintained by TMA (Taiwan Medical Association). The registry has been required by the governmental regulation for verification of credentials of all practicing doctors. The data only indicates the latest status on the date of December 31, 2006, or on the date of deceased or termination of membership. Although moving location of practice for doctors in Taiwan may not be very prevalent in general, we have included the limitation in the “Discussion” section as recommended by you in another comment as well. Please kindly see the revised paragraph as follows: (Please see page 13, ll. 7-11)

clarification. Secondly, information was limited by the hospital level and the locations which the doctor has ever practiced, i.e., misclassification of the region of practice without differentiating primary/referral hospital and urban/rural setting. Thus, we had to assume that it might be a random effect and only lead to the null or under-estimation.

### **Comment # 2**

**The question of approval is unclear. The authors state that they all "have complied with the Principles of Ethical Practice of Public Health", but is this the same as approval?**

**Response:** We would like to thank the reviewer for your comment. Yes, this study was approved by the Ethics Review Board of the National Taiwan University College of Public Health. For further clarification, please kindly see the revised “Competing interests” (page 14) as follows:

### **Competing interests:**

All authors of this manuscript indicate no conflicts of interest and have complied with the Principles of Ethical Practice of Public Health. The Ethics Review Board of our

institute (Institute of Occupational Medicine and Industrial Hygiene College of Public Health, National Taiwan University, Taiwan) approved the protocol before the commencement of this study.

### Comment # 3

**It might be useful to explore a possible convergence in mortality between doctors and other segments of the population, like we did in our study on Norwegian doctors (Aasland OG, Hem E, Haldorsen T. Ekeberg Ø. Mortality among Norwegian doctors. BMC Health Serv Res. 2011 Mar 22; 11 (1):173).**

**Response:** The authors would like to thank the reviewer for the constructive comment, which advice us to prevent potential confounding from education and/or socioeconomic status by using other comparable segments of population. In Taiwan, doctors have much higher average earnings per month than all the other health professionals like nurses. It is different from a more socialist country like Norway. The relevant data can be found in The Labor Statistics Database of the International Labor Organization, as summarized below:

|        | Physician<br>(Average earnings per month) | Professional nurse<br>(Average earnings per month) | Physician vs Nurse |
|--------|-------------------------------------------|----------------------------------------------------|--------------------|
| Taiwan | 112,658 NT                                | 35,461 NT                                          | 3.17               |
| Norway | 58,059 Krone                              | 32,214 Krone                                       | 1.80               |

Source: The Labour Statistics Database of the International Labor Organization (1999-2008).

Moreover, since our previous study found that the overall and cause-specific SMRs (Standardized Mortality Ratios) of doctors of all different specialties in Taiwan were generally less than 0.30-0.34 in comparison with the general population (Reference # 11, Shang TF, et al. Mortality of Doctors in Taiwan, 1990-2006. Occup Med (Lond) 2011;61(1):29-32. in the manuscript), it would be very difficult for us to choose a much less confounded occupation as the referents for comparison. In fact, we have tried to adopt school teachers, professors, or other health professionals as the reference population. However, doctors could keep on practice without retirement in Taiwan due to our culture and the system of health care, which is dominated by private sectors (85% of the hospitals and 97% of the clinics) and no age limit in the reimbursement policy of the National Health Insurance. Thus, doctors often practice until a very old age, even up to 70-80 years old, while all other professional groups are required to retire before the age of 65-70 and their names are usually removed

from the registries after retirement. The comparability of information would be a big problem and difficult to be tackled.

To prevent potential confounding by different socioeconomic status profession-related knowledge, health-related behaviour and different ages of retirement, we decided to use “internal comparison”, namely, selecting internists who are of the biggest size as the reference population for SMR calculation in this study, instead of other segments of population. And time after practice is also considered as a risk factor to replace age because of co-linearity in the model construction. Thus, we have revised several sentences in the manuscript, as follows: (Please see page 11, ll. 9-14)

(Table 4). Because doctors in Taiwan generally have higher earnings than all other segments of professionals and there is no upper limit of retirement age, we have decided to select “internal comparisons” among doctors with the same socioeconomic status, profession-related knowledge and health-related behaviour, to prevent confounding and would leave the effects of mortality to the other two main factors, occupational workload or practice environment.

#### Comment # 4-1

**Out-patient settings: Half of the doctor population in this study is categorized as internists. Since none of the categories are called family medicine or general practice, I assume that some of the internists are in effect general practitioners working outside hospitals, but such information is not given. One should think that “patient load”, or doctor to population ratio, as a possible confounding variable for stress etc., is more important for doctors in outpatient settings? More information on the work pattern for doctors in Taiwan is needed! (See also point 5 below)**

**Response:** Thanks for the constructive comment. In Taiwan, traditionally the family medicine (family doctor) or general practitioners used to be under the name of general medicine, which have been included in the internists group. In fact, we have a table detailing the definition for different specialties in our previous paper (Reference # 11, Shang TF, et al. Mortality of Doctors in Taiwan, 1990-2006. Occup Med (Lond) 2011;61(1):29-32. in the manuscript), which is shown as below for clarification:

| Specialty | Individual Specialties                                |
|-----------|-------------------------------------------------------|
| Surgeon   | General surgery, Paediatric surgery, Plastic surgery, |

---

|                    |                                                            |
|--------------------|------------------------------------------------------------|
|                    | Cardiothoracic surgery, Traumatic surgery,                 |
|                    | Emergency surgery, Neurosurgery.                           |
| Internist          | General medicine, Cardiology, Physical medicine,           |
|                    | Nephrology, Endocrinology, Clinical genetics,              |
|                    | Gastroenterology, Haematology, Oncology,                   |
|                    | Occupational medicine, Chest medicine, Neurology,          |
|                    | Infectious disease, Epidemiology, Intensive care medicine, |
|                    | Forensic medicine,                                         |
| Dermatologists     | Dermatology,                                               |
| Otolaryngologists  | Ear nose throat surgery,                                   |
| Ophthalmologists   | Ophthalmology,                                             |
| Pathologists       | Clinical pathology, Pathology,                             |
| Paediatricians     | Paediatric,                                                |
| Psychiatrists      | Psychiatry,                                                |
| Radiologists       | Nuclear medicine, Radiotherapy,                            |
|                    | Radiation oncology, Radiology,                             |
| Obstetricians      | Obstetrics, Gynaecology,                                   |
| Orthopaedists      | Orthopaedics surgery,                                      |
| Anaesthesiologists | Anaesthetics.                                              |

---

In addition to this above clarification, we also add Reference # 11 in the “Methods” section as follows: (Please see page 6, ll. 6-9)

for verification of credentials of all practicing doctors. It contains the name of each individual, date and place of birth, gender, national identification number, medical school attended, date of graduation, self-designated specialty<sup>11</sup>, place of practice, vital status, date of death for decedents, and date of ceasing the membership. The cohort

#### Comment # 4-2

**Doctor mobility: In this study the present working location (by region) for each doctor is used as a predictor for mortality. In my own country doctors move around quite a bit, mainly from rural to urban areas, but also from urban to rural. The analyses in this study presuppose no such movements – is this realistic? And linked to this argument, why do some doctors choose rural and other urban areas, or different geographical locations in general? Can such reasons be causes of variation in health and mortality?**



1  
2  
3 **Response:** Again, thank you for the comment. The retrospective cohort was  
4 established from the registry of the doctor file maintained by TMA (Taiwan Medical  
5 Association). The registry has been required by the governmental regulation for  
6 verification of credentials of all practicing doctors. The data shows the latest status  
7 only on the date of December 31, 2006, or on the date of deceased or termination of  
8 membership.  
9

10  
11 As I mentioned in one of the earlier responses, the health care system of Taiwan is  
12 dominated by private sectors (85% of the hospitals and 97% of the clinics) and  
13 doctors have been allowed to select practicing location freely and enjoy a higher  
14 income by the universal coverage of compulsory national health insurance. While  
15 there may be moving of practicing locations, most doctors usually stay in a location  
16 for a long time because it generally takes several years to develop his/her regular  
17 clients in a community. However, we appreciate this comment and make following  
18 revision in the "Discussion" section as our response to the comment # 1: (Please see  
19 page 13, ll. 7-11)  
20  
21  
22  
23  
24

25  
26 clarification. Secondly, information was limited by the hospital level and the locations  
27 which the doctor has practiced, i.e., misclassification of the region of practice without  
28 differentiating primary/referral hospital and urban/rural setting. Thus, we had to  
29 assume that it might be a random effect and only lead to the null or under-estimation.  
30  
31  
32  
33  
34

#### 35 **Comment # 4-3**

36 **Cohort and age:** A distinction is made between the doctors who started their  
37 practice before and after 1995, respectively. We are told that in 1995 a National  
38 Health Insurance System was implemented, and that the younger doctors,  
39 because of this (?), "might possibly suffer from highly stressed work during their  
40 practice" (page 11). The meaning of this is unclear: didn't also the older doctors,  
41 at least those still in practice, have to comply with the new insurance system?  
42 Also, "age for beginning practice" is used as the general age variable in the  
43 models. Why not use biological age?  
44  
45  
46  
47  
48

49 Response: Thank you for your comment. Yes, both young and old doctors have been  
50 influenced by the establishment of the National Health Insurance program. However,  
51 most older doctors have already established their community practice, while young  
52 doctors would be more likely to have a higher stress during the initial stage of  
53 developing his/her clients in a community. Moreover, the cohort in our study was  
54 established during 1990-2006, which may have selected healthy survivors among the  
55  
56  
57  
58  
59  
60

1  
2  
3 older doctor group in this registry.

4 The statistical analysis shows that the practicing duration is highly collinear to the  
5 biological age (i.e. age at censoring in the study). We chose the latter to be included in  
6 the final model, because there is no upper limit of retirement for doctors in Taiwan  
7 and doctors who are still practicing are generally healthier than those who retired.  
8 Moreover, the use of practicing time can be a more accurate measurement of  
9 workload and/or occupational exposure in terms of duration.

10 In our study, years of beginning practice were used as independent variables to control  
11 the potential confounding from a specific group. This group consists of doctors who  
12 practiced at an older age experienced higher HR of mortality. Most of them are  
13 veteran doctors who took ad-hoc medical mission during the world II and did not  
14 receive an academic medical education. Following your constructive advice, we have  
15 added this information in the Methods section to clarify for our future readers, as  
16 follows: (Please see page 7, ll. 19-23)

17  
18  
19  
20  
21  
22  
23  
24  
25 beginning practice, and doctor to population ratio. In Taiwan, some of our doctors  
26 were veteran who took ad-hoc medical missions during the world II and did not  
27 receive an academic medical education. They generally began their practices at an age  
28 older than most other doctors and deserved for this study to control as a potential  
29 confounder. We applied the stepwise strategy for variable selection with the  
30  
31  
32  
33  
34

#### 35 **Comment # 4-4**

36 **Why are anesthesiologists always singled out? I am aware that there may exists**  
37 **an impression internationally that anesthesiologists have a higher mortality than**  
38 **other medical specialists, although the documentation for this is not very**  
39 **convincing (see e.g. the special issue of Acta Anaesthesiol Scand from 2002 on this**  
40 **topic (p. 1183 ff)). The quote from Bruce et al. (# 17) describing "the hazards of**  
41 **operation rooms" is 44 years old and hardly relevant today. I can not see the**  
42 **rationale for tabulating the 16 deaths among anesthesiologists across a large**  
43 **number of causes, as in table 3. Also, even if I understand that another**  
44 **publication (# 11) may have tabulated the differences between doctors and the**  
45 **general population in causes of death, I miss some of these comparative data in**  
46 **the present paper.**  
47  
48  
49  
50  
51  
52

53  
54 **Response:** Thanks. Although we had some hypotheses in mind before this study, the  
55 condition in Taiwan might not necessarily be the same as previous reports. Thus, we  
56 used the national cohort data to analyze the mortality risks or hazard ratios (HRs) for  
57  
58  
59  
60

1  
2  
3 all formally registered specialties tabulated above (response to the comment # 4-1),  
4 including radiologists, pathologists, psychiatrists, dentists, surgeon and  
5 anesthesiologists, etc. And we consistently detected significantly increased HRs for  
6 surgeons and anesthesiologists. Hence, we would like to know whether any specific  
7 diseases would happen among these two specialties who were well known to be  
8 exposed to the hazards of operation rooms and the results have been showed in Table  
9 3.  
10  
11  
12  
13

14  
15  
16 **Comment # 4-5**

17 **Internists as reference: The large – and possibly quite heterogeneous – group of**  
18 **internists is used as reference throughout the paper. Is this optimal? Wouldn't**  
19 **the contrasts be clearer if one of the smaller more homogeneous groups were**  
20 **used, e.g. the surgeons? And where are the family doctors?**  
21  
22  
23

24 **Response:** Thank you again for your comment. To achieve maximal statistical  
25 efficiency, we had better select a reference group with a sufficient size of subjects and  
26 take the advantage of employing the software of Life Table Analysis System (LTAS)  
27 produced by the U.S. NIOSH (National Institute of Occupational Safety and Health)  
28 to calculate the standardized mortality ratios (SMRs). This software tabulates the  
29 underlying causes of death as well as the person-year of follow-up into age-, gender-,  
30 and race-specific strata. Therefore, since there are 18,664 internists as contrast to  
31 4,571 surgeons, we use the largest number of referents to detect potential hazards for  
32 other subspecialties, as our study in the reference No. 11 has indicated that there were  
33 small variations of SMR's among different specialties of doctors. Please also kindly  
34 refer to the table included in our response to the Comment # 4-1 for the definitions of  
35 family doctors (family medicine), general practitioners, or general medicine in  
36 Taiwan.  
37  
38  
39  
40  
41  
42  
43  
44  
45  
46  
47  
48  
49  
50  
51  
52  
53  
54  
55  
56  
57  
58  
59  
60

1  
2  
3  
4 **Disparities in Mortality among Doctors in Taiwan:**  
5  
6  
7 **A 17-year follow-up study of 37,545 Doctors**  
8  
9

10  
11 Tung-Fu Shang<sup>1</sup>, Pau-Chung Chen<sup>2</sup>, Jung-Der Wang<sup>2,3</sup>  
12

13  
14 <sup>1</sup> *Bureau of International Cooperation, Department of Health, Executive Yuan, 36*  
15 *Tacheng St., Taipei City 103, Taiwan.*  
16

17  
18 <sup>2</sup> *Institute of Occupational Medicine and Industrial Hygiene, National Taiwan*  
19 *University College of Public Health, 17 Xu-Zhou Rd., Taipei City 100, Taiwan*  
20

21  
22 <sup>3</sup> *Department of Public Health, National Cheng Kung University College of Medicine,*  
23 *1 University Rd., Tainan 701, Taiwan.*  
24

25  
26 *\*Correspondence to: Jung-Der Wang, Department of Public Health, National Cheng*  
27 *Kung University College of Medicine, 1 University Rd., Tainan 701, Taiwan.*  
28

29  
30 Tel : +886-6-2353535 ext 5600

31  
32 Fax : +886-6-2359033

33  
34 E-mail: jdwang121@gmail.com  
35  
36  
37  
38  
39  
40  
41  
42  
43  
44  
45  
46  
47  
48  
49  
50  
51  
52  
53  
54  
55  
56  
57  
58  
59  
60

1  
2  
3  
4 **Objectives.** We used cohort data from the registry of all doctors in Taiwan to  
5  
6 determine if the effect of health disparities exists after control of potential  
7  
8 confounding by different occupational exposures in different specialties.  
9

10 **Design.** Retrospective cohort study, 1990-2006.

11  
12 **Settings.** The Taiwan Medical Association (TMA).

13  
14 **Participants.** A total of 37,545 doctors from the registry of the doctor file maintained  
15  
16 by TMA. The registry has been required by the governmental regulation for  
17  
18 verification of credentials of all practicing doctors.  
19

20  
21 **Main outcome measures.** Cause-specific standardized mortality ratios (SMRs) for  
22  
23 surgeons and anesthesiologists were compared to those of the internists. Cox's  
24  
25 proportional hazard model was constructed to explore multiple risk factors for  
26  
27 mortality, including specialties, age, gender, geographic region of practices, regional  
28  
29 health resources, ages of beginning practices, and years of beginning practice.  
30

31  
32 **Results.** The all-cause specific SMRs for surgeons and anesthesiologists were  
33  
34 marginally elevated at 1.15 (95% confidence interval: 0.98-1.34) and 1.62 (95% CI:  
35  
36 0.93-2.64) respectively. The Cox regression model showed that the anesthesiologists  
37  
38 had the highest hazard ratio (HR) of 1.97, seconded by surgeons at 1.23. Localities  
39  
40 with the doctor to population ratio lower than 1:500 were associated with an increased  
41  
42 HR of doctor mortality.  
43

44  
45 **Conclusions.** The doctor to population ratio and the region of practice may influence  
46  
47 doctor's mortality. Increasing number of doctors and/or improving the practice  
48  
49 environment may be helpful in reducing the health disparities in regions with poor  
50  
51 resources.  
52  
53  
54  
55  
56  
57  
58  
59  
60

## Article Summary

### Article focus

To determine if the effect of health disparities exists after control of potential confounding by different occupational exposures in different specialties.

### Key messages

- All factors leading to health disparities also influence the mortality rates of healthcare providers, including doctors who practiced in such locality.
- Increasing the numbers of doctors and/or improving the practice environment may be helpful in reducing the health disparities of both the general public and doctors residing in a region with poor resources.

### Strengths and limitations of this study

#### Strengths

- The cohort data includes all practicing doctors in Taiwan.
- We use internists as the reference population for SMR calculation to minimize the potential confounding by different socioeconomic states.

#### Limitations

- Possible misclassification of self-claimed specialty may be a source of bias while comparing the mortality rates among different specialties.
- Information was limited about the hospital level and location practiced, i.e., misclassification of the region of practice without differentiating primary/referral hospital and urban/rural setting.

1  
2  
3  
4 During practices, health care providers have already been noted to suffer from certain  
5  
6 specific potential hazards like stress, radiation, anesthetic gases or agents and  
7  
8 biologically hazardous blood or body fluids, which have been documented in many  
9  
10 previous studies among radiologists, pathologists, psychiatrists, dentists, and  
11  
12 anesthesiologists<sup>1-6</sup>.

14 Beginning in 1995, Taiwan launched the National Health Insurance (NHI)  
15  
16 program and attempted to mitigate the health disparity among the general population  
17  
18 living in different geographic regions. The provision of universal health care coverage  
19  
20 has increased the health care demand<sup>7-8</sup>. For example, the number of outpatient visits  
21  
22 per person increased from 10.56 in 1995 to 14.88 in 2008, and the numbers of  
23  
24 hospitalized patients and outpatient visits per doctor increased as well<sup>9-10</sup>. Thus, all  
25  
26 the healthcare professionals, including doctors, have encountered a heavier workload  
27  
28 and a greater psychosocial demand than before. However, a standardized mortality  
29  
30 ratio (SMR) study using the general population as the reference for comparison did  
31  
32 not detect any increased mortality among doctors in Taiwan<sup>11</sup>.

36 From an alternative perspective, the association between demographic  
37  
38 characteristics of human resources in health and the health of the population served  
39  
40 has received considerable attention<sup>12-13</sup>. There is a growing evidence that the density  
41  
42 of the health workforce is directly correlated with positive health outcomes in the  
43  
44 population they serve, such as maternity mortality, infant mortality and life  
45  
46 expectancy<sup>14</sup>. Other factors like geographic location, socioeconomic states and  
47  
48 distribution of current health care resources might also affect health outcome and  
49  
50 incline to inter-correlate with each other.

53 As all factors leading to health disparities are affecting people within respective  
54  
55 locality<sup>15</sup>, we hypothesized that they also influence the mortality rates of healthcare  
56  
57 providers, including doctors who practiced in such locality. In the present study, we  
58  
59  
60

1  
2  
3 used the cohort data from the registry of the doctor file maintained by the Taiwan  
4  
5 Medical Association (TMA) and recruited internists, the largest group, as referents to  
6  
7 determine if the effect of health disparities exists after control of potential  
8  
9 confounding by different occupational exposures in different specialties.  
10  
11  
12  
13  
14  
15  
16  
17  
18  
19  
20  
21  
22  
23  
24  
25  
26  
27  
28  
29  
30  
31  
32  
33  
34  
35  
36  
37  
38  
39  
40  
41  
42  
43  
44  
45  
46  
47  
48  
49  
50  
51  
52  
53  
54  
55  
56  
57  
58  
59  
60

For peer review only



## Methods

### Subjects and data collection

The retrospective cohort was established from the registry of the doctor file maintained by TMA. The registry has been required by the governmental regulation for verification of credentials of all practicing doctors. It contains the name of each individual, date and place of birth, gender, national identification number, medical school attended, date of graduation, self-designated specialty<sup>11</sup>, place of practice, vital status, date of death for decedents, and date of ceasing the membership. The cohort was established beginning in January 1990 and followed up to December 2006. Practice time was accrued until 2006, or the date of deceased or termination of membership. There were 29 decedents with incomplete information on date or month of death, of which this study assumed to be on the first day of the month or year. Since all practicing doctors must be registered in compliance to the Doctors Act in Taiwan, the dataset is very comprehensive and accurate.

### Statistical analysis

Geographic data in doctors per 10,000 persons, per capita disposable income (US\$), education, infant mortality rate (per 1000 live births), and life expectancy at birth were collected and analyzed from national statistics of the Directorate General of Budget, Accounting and Statistics (Taiwan) in 1998, 2002, and 2006. Geographic region was categorized into northern, central, southern and eastern region following the naming of branches of Bureau of National Health Insurance. Education indicated the percentage of people aged more than 15 who attained an education level of college or above.

All-cause and cause-specific standardized mortality ratios (SMRs) were obtained by employing the personal computer version of Life Table Analysis System (LTAS.NET). The LTAS was originally developed by the National Institute for

1  
2  
3  
4 Occupational Safety and Health (NIOSH) during the 1970s and was later converted  
5  
6 for use on Windows 98/NT/2000/XP-compatible PCs. This program tabulates the  
7  
8 underlying causes of death as well as the person-years of follow-up into age-, gender-,  
9  
10 and race-specific strata, and allows users to apply internal controls as referents to  
11  
12 replace general population from vital statistics. SMRs and 95% confidence intervals  
13  
14 (CIs) were calculated using the mortality rates of 119 underlying causes of death of  
15  
16 the internists of Taiwan as the reference group. We used SAS Version 9.1 (SAS  
17  
18 institute) to edit and analyze the data. In this study, we set the significance level at  
19  
20  $p=0.05$ .  
21  
22

23  
24 Cox regression analysis was conducted to determine the hazard ratios for the  
25  
26 following risk factors: age, gender, specialty, geographic region of practice, age of  
27  
28 beginning practice, calendar year of beginning practice (before or after 1995 when the  
29  
30 NHI system was established), and doctor to population ratio. The ratio between  
31  
32 doctors and population was categorized into 4 levels: larger than 1:500, from 1:500 to  
33  
34 1:700, from 1:700 to 1:900, and less than 1:900. Since the northern region of Taiwan  
35  
36 leads development for the last half a century, it was chosen to be the reference in the  
37  
38 statistical model. The covariates considered in the regression analysis were gender,  
39  
40 specialty, geographic region of practice, age of beginning practice, calendar year of  
41  
42 beginning practice, and doctor to population ratio. In Taiwan, some of our doctors  
43  
44 were veteran who took ad-hoc medical missions during the world II and did not  
45  
46 receive an academic medical education. They generally began their practices at an age  
47  
48 older than most other doctors and deserved for this study to control as a potential  
49  
50 confounder. We applied the stepwise strategy for variable selection with the  
51  
52 significance level for entry and the significance level for stay set to 0.15. Regression  
53  
54 diagnostics were also run, including examination of proportional hazard assumption,  
55  
56 residual analysis, detection of influential cases, and check for multi-co-linearity to  
57  
58  
59  
60

1  
2  
3 assure the quality of analysis and goodness of fit for the model.  
4  
5  
6  
7  
8  
9  
10  
11  
12  
13  
14  
15  
16  
17  
18  
19  
20  
21  
22  
23  
24  
25  
26  
27  
28  
29  
30  
31  
32  
33  
34  
35  
36  
37  
38  
39  
40  
41  
42  
43  
44  
45  
46  
47  
48  
49  
50  
51  
52  
53  
54  
55  
56  
57  
58  
59  
60

For peer review only

## Results

With the doctor to population ratio above 1:500 as the reference level, we found that a lower ratio significantly increased the hazard ratio (HR) of doctor mortality; there was also an independent effect of regional difference of higher HR for southern and eastern regions, as summarized in Table 4. The differences among localities seemed to correlate well with higher average levels of income and education, lower infant mortality rates, and longer life expectancies across Taiwan. And such disparities did not appear to have changed during the last decade (Table 1).

A total of 37,545 doctors were tabulated in the study from January 1990 to December 2006. During the above period, there were 1642 deaths among 32,713 male doctors and 44 deaths among 4822 female doctors. The overall mean age at death was  $69.88 \pm 14.28$  years old, with  $70.06 \pm 14.04$  for males and  $62.96 \pm 20.21$  for females, respectively. (Table 2) Approximately half (49.7%) of the cohort had been internists, 48.1% were practicing in the north region. Among all doctors, there were 30.8% working in the area of low doctor to population ratio. About two-thirds began their practice before 1995, and over 90% started practice at age below 40.

As for the control for socioeconomic status in the analysis, we used the internists as the reference population and found that the all cause specific SMRs for surgeons and anesthesiologists were marginally elevated with an SMR of 1.15 (95% CI: 0.98-1.34) and 1.62 (95% CI: 0.93-2.64), respectively (Table 3). Among the surgeons, the SMR of “Neoplasm of lymphatic and hematopoietic tissue” was increased but without statistical significance (SMR = 2.17, 95% CI: 0.94 to 4.28). The observed numbers of deaths from malignant neoplasm of digestive organs and peritoneum were significantly lower than corresponding expected values (SMR = 0.54,  $p < 0.05$ , 95% CI: 0.29 to 0.92). Among the anesthesiologists, the SMR of “malignant neoplasm of other and unspecified sites” was significantly increased (SMR = 8.73,  $p < 0.05$ , 95%

1  
2  
3  
4  
5  
6  
7  
8  
9  
10  
11  
12  
13  
14  
15  
16  
17  
18  
19  
20  
21  
22  
23  
24  
25  
26  
27  
28  
29  
30  
31  
32  
33  
34  
35  
36  
37  
38  
39  
40  
41  
42  
43  
44  
45  
46  
47  
48  
49  
50  
51  
52  
53  
54  
55  
56  
57  
58  
59  
60

CI: 1.06 to 31.53), although there were only 2 cases on the observed number.

To further adjust for other risk factors, the Cox regression model was constructed and the results were summarized in Table 4. The anesthesiologists appeared to show the highest hazard ratios (HRs) of 1.97 (95% CI, 1.20 to 3.25), followed by surgeons with a HR of 1.23 (95%CI, 1.04 to 1.46). The HR of ophthalmologists was significantly lower than all other specialists, of which the HR was 0.72 (95%CI, 0.53 to 0.98). In addition, doctors living in the northern region and the central region experienced lower HR's. And doctors who worked in the area with doctor to population ratio below 1:500 showed higher mortality or HR.

The doctors who began practice at an older age had a higher HR of 1.12 (95%CI, 1.12 to 1.13) for every single year increment. Overall, doctors who began practice after the implementation of NHI Program, or the year of 1995, showed a higher HR of 6.17 (95%CI, 4.27 to 8.92).

## Discussion

Based on Cox's Model analysis, we found doctors practicing in southern and eastern regions of Taiwan suffered from statistically significant premature mortality (Table 4), and such a geographic disparity appeared to correspond to the lower life expectancy and higher infant mortality rate in Taiwan (Table 1). To our limited knowledge, this study is the first to show that doctors practicing in the area of a low doctor to population ratio or in the less resourceful regions experienced a higher HR of mortality after adjustment for gender, age of beginning practice, and specialties (Table 4). Because doctors in Taiwan generally have higher earnings than all other segments of professionals and there is no upper limit of retirement age, we have decided to select "internal comparisons" among doctors with the same socioeconomic status, profession-related knowledge and health-related behaviour, to prevent confounding and would leave the effects of mortality to the other two main factors, occupational workload or practice environment.

Lowest average income, educational level and life expectancy, and the highest infant mortality rate in Taiwan were found in the eastern region (Table 1). Traditionally, this mountainous region impedes transportation tremendously, and plays a significant role in reduced healthcare accessibility for people, including health care providers themselves. Although the doctor to population ratio has improved since the promulgation of Medical Care Act in 1986 and implementation of NHI in 1995, doctors living in this region still suffer from a higher HR. It may indicate that the health disparity still exists. Moreover, in analyzing the central and southern regions, where similar levels of the average income and the education were found, a significantly increased hazard ratio was detected in the southern region only. As noted in Table 1, the doctor to population ratio has been consistently found to be lower in the southern region compared with those of the northern and central regions. These

1  
2  
3 findings indicate persistent health disparities in different regions of Taiwan, and  
4 suggest that occupational workloads might play some role in view of the increased  
5 mortality of doctors.  
6  
7  
8

9  
10 In a previous study, we found that the overall and cause-specific SMRs of doctors  
11 in Taiwan were less than 0.34 for different specialties<sup>11</sup>, which may have been  
12 confounded by using the general population as the referents for comparison<sup>16</sup>. In this  
13 study, we use internists as the reference population for SMR calculation to minimize  
14 the potential confounding by different socioeconomic states (Table 3). Although no  
15 increased mortality was found among radiologists, pathologists, and psychiatrists, as  
16 reported from other countries<sup>2-4</sup>, we detected significantly increased HRs for surgeons  
17 and anesthesiologists (Table 4). A further analysis only detected slightly elevated  
18 SMR for malignant neoplasm of lymphatic and hematopoietic tissues among surgeons,  
19 which appeared to corroborate the hazards of operation room reported by others<sup>17</sup>.  
20 However, the trend was less apparent because of the small sample size of  
21 anesthesiologists. Since the current mortality data in Taiwan only allowed for coding  
22 single underlying cause of death, it may further decrease the power of detection of  
23 occupational related illnesses.  
24  
25  
26  
27  
28  
29  
30  
31  
32  
33  
34  
35  
36  
37  
38  
39

40 Our study also demonstrated the HR of mortality was higher in the group  
41 beginning their practice since 1995, when the National Health Insurance system was  
42 implemented. This group belonged to a younger generation of doctors, who might  
43 possibly suffer from highly stressed work during their practice<sup>18</sup>. Such a stress might  
44 arise from their clinical training program or the newly implemented health policy.  
45 However, the cohort was established during 1990-2006, which may have imposed a  
46 selection of healthy survivors among the doctors. They began their practice before  
47 1995 in comparison with those who entered the workforce after 1995. Thus, more  
48 study is needed to explore the above hypothesis.  
49  
50  
51  
52  
53  
54  
55  
56  
57  
58  
59  
60

1  
2  
3  
4  
5  
6  
7  
8  
9  
10  
11  
12  
13  
14  
15  
16  
17  
18  
19  
20  
21  
22  
23  
24  
25  
26  
27  
28  
29  
30  
31  
32  
33  
34  
35  
36  
37  
38  
39  
40  
41  
42  
43  
44  
45  
46  
47  
48  
49  
50  
51  
52  
53  
54  
55  
56  
57  
58  
59  
60

Several limitations of this study should be noted. Firstly, possible misclassification of self-claimed specialty may be a source of bias while comparing the mortality rates among different specialties. For instance, a surgeon shifted to general practice after retiring from a medical center may result in overestimation of the practice duration and possible underestimation of the effect of specialty. Thus, the higher HR's among surgeons and anesthesiologists may need to be further studied for clarification. Secondly, information was limited about the hospital level and the locations which the doctor has practiced, i.e., misclassification of the region of practice without differentiating primary/referral hospital and urban/rural setting. Thus, we had to assume that it might be a random effect and only lead to the null or under-estimation.

In conclusion, disparities both in the geographic region of doctor's practice and the ratio of doctor to population regionally are the primary determinants to the HR of doctor mortality. Thus, we recommend increasing the number of doctors and improving the practice environment of eastern and southern regions of Taiwan, which may possibly mitigate the health disparities among doctors and people. Further, more studies are needed to explore and reduce the potential hazards among workplaces of anesthesiologists and surgeons in Taiwan.



## Acknowledgements

The authors express sincere appreciation to Taiwan Medical Association (TMA) for the maintenance of the relevant database. We also thank Dr. Fu-Chang Hu for his assistance in data analysis using SAS. The study was partially supported by a grant from the National Science Council of the Executive Yuan, Taiwan (No. NSC 99-2628-B-006-036-MY3). The sponsors had no role in the study design, data collection, data analyses, the interpretation of data, the writing of the report, or the decision to submit the article for publication.

## Contribution statement

The first author, Dr. Tung-Fu Shang, has acquired the dataset, designed the study together with Dr. Wang (the corresponding author), conducted the analysis under the full supervision and discussion with Drs. Chen and Wang, written the first draft, and all three participated in the revision of the later drafts until the final one.

Dr. Shang has access to all the data in the study and takes responsibility for the integrity of the data. Together with all co-authors, we shall be responsible for the accuracy of the data analysis, interpretation of the results.

## Competing interests:

All authors of this manuscript indicate no conflicts of interest and have complied with the Principles of Ethical Practice of Public Health. The Ethics Review Board of our institute (Institute of Occupational Medicine and Industrial Hygiene College of Public Health, National Taiwan University, Taiwan) approved the protocol before the commencement of this study.

1  
2  
3  
4  
5  
6  
7  
8  
9  
10  
11  
12  
13  
14  
15  
16  
17  
18  
19  
20  
21  
22  
23  
24  
25  
26  
27  
28  
29  
30  
31  
32  
33  
34  
35  
36  
37  
38  
39  
40  
41  
42  
43  
44  
45  
46  
47  
48  
49  
50  
51  
52  
53  
54  
55  
56  
57  
58  
59  
60

**Funding**

The study was partially supported by a grant from the National Science Council of the Executive Yuan, Taiwan (No. NSC 99-2628-B-006-036-MY3). The sponsors had no role in the study design, data collection, data analyses, the interpretation of data, the writing of the report, or the decision to submit the article for publication.

For peer review only

## References

1. Alexander BH, Checkoway H, Nagahama SI, Domino KB. Cause-specific mortality risks of anesthesiologists. *Anesthesiology* 2000;93(4):922-30.
2. Rich CL, Pitts FN. Suicide by psychiatrists: a study of medical specialists among 18,730 consecutive physician deaths during a five-year period, 1967-72. *J Clin Psychiatry* 1980;41:261-3.
3. Hall A, Harrington JM, Aw TC. Mortality study of British pathologists. *Am J Ind Med* 1991;20:83-9.
4. Logue JN, Barrick MK, Jessup GL, Jr. Mortality of radiologists and pathologists in the Radiation Registry of Physicians. *Journal of Occupational Medicine* 1986;28(2):91-9.
5. Hill GB, Harvey W. The mortality of dentists. *Br Dent J* 1972;132:179-82.
6. Doll R, Peto R. Mortality among doctors in different occupations. *British Medical Journal* 1977;1(6074):1433-6.
7. Cheng SH, Chiang TL. The Effect of Universal Health Insurance on Health Care Utilization in Taiwan. Results from a Natural Experiment. *JAMA* 1997;278:89-93.
8. Lu JR, Hsiao WC. Does Universal Health Insurance Make Health Care Unaffordable? Lessons from Taiwan. *Health Affairs* 2003;22:77-88.
9. National Health Insurance. Statistical Annual Report of Medical Care. Taipei: The ROC Department of Health; 2003.
10. Department of Health. Taiwan Public Health Report 2009. Taipei: The ROC Department of Health; 2010.
11. Shang TF, Chen PC, Wang JD. Mortality of Doctors in Taiwan, 1990-2006. *Occup Med (Lond)* 2010;60(8).
12. Anand S, Barnighausen T. Human resources and health outcomes: cross-country econometric study. *Lancet* 2004;364:1603-09.
13. Anyangwe SC, Mtonga C. Inequities in the Global Health Workforce: The Greatest Impediment to Health in Sub-Saharan Africa. *Int J Environ Res Public Health* 2007;4:93-100.
14. Högberg U. The World Health Report 2005: "make every mother and child count" - including Africans. *Scand J Public Health* 2005;33:409-11.
15. Division of Health Statistics. Mortality rate by local. Taipei: The ROC Department of Health; 2008.
16. Wang JD, Miettinen OS. Occupational mortality studies: principles of validity. *Scand J Work Environ Health* 1982;8:153-8.
17. Bruce DL, Eide KA, Linde HW, Eckenhoff JE. Causes of death among

1  
2  
3  
4  
5  
6  
7  
8  
9  
10  
11  
12  
13  
14  
15  
16  
17  
18  
19  
20  
21  
22  
23  
24  
25  
26  
27  
28  
29  
30  
31  
32  
33  
34  
35  
36  
37  
38  
39  
40  
41  
42  
43  
44  
45  
46  
47  
48  
49  
50  
51  
52  
53  
54  
55  
56  
57  
58  
59  
60

anesthesiologists: A 20-year survey. *Anesthesiology* 1968;29:565-69.

18. British Medical Association. The morbidity and mortality of the medical profession. A literature review and suggestions for future research. London: British Medical Association; 1993.

For peer review only

**Table 1 -- Geographic disparities in doctors per 10,000 persons, per capita disposable income (US\$), education, infant mortality rate (per 1000 live births), and life expectancy at birth in 1998, 2002, and 2006.**

| Region   | Doctors per 10,000 persons |      |      | Per capita disposable income |        |        | Education <sup>§</sup> |      |      | Infant mortality rate |      |      | Life expectancy |      |      |
|----------|----------------------------|------|------|------------------------------|--------|--------|------------------------|------|------|-----------------------|------|------|-----------------|------|------|
|          | 1998                       | 2002 | 2006 | 1998                         | 2002   | 2006   | 1998                   | 2002 | 2006 | 1998                  | 2002 | 2006 | 1998            | 2002 | 2006 |
| Northern | 14.7                       | 16.5 | 17.4 | 8394.8                       | 8912.6 | 9853.0 | 24.8                   | 30.1 | 36.1 | 6.2                   | 4.9  | 4.4  | 77.4            | 78.6 | 79.5 |
| Central  | 14.1                       | 16.5 | 18.3 | 7044.2                       | 6940.0 | 7817.6 | 18.8                   | 23.2 | 28.6 | 6.9                   | 5.8  | 4.5  | 75.1            | 77.0 | 77.6 |
| Southern | 12.9                       | 14.5 | 16.5 | 6928.8                       | 7157.5 | 7891.2 | 18.4                   | 22.8 | 27.7 | 6.4                   | 5.4  | 4.8  | 74.7            | 76.0 | 76.5 |
| Eastern  | 13.3                       | 15.4 | 18.3 | 6542.2                       | 6683.0 | 7987.6 | 11.8                   | 14.4 | 20.0 | 12.4                  | 8.3  | 7.6  | 70.6            | 72.9 | 73.2 |

<sup>§</sup>**Education:** The percentage of people aged more than 15 attained an education level of college or above

Table 2 -- Characteristics of Taiwan doctors included in the study from 1990 to 2006.

|                                  | Taiwan doctors |                   | Deceased doctors |                   |
|----------------------------------|----------------|-------------------|------------------|-------------------|
|                                  | No. (%)        | mean censored age | No. (%)          | mean age at death |
| <b>Total</b>                     | 37,545 (100)   | 46.41±14.47       | 1686 (100)       | 69.88±14.28       |
| <b>Status</b>                    |                |                   |                  |                   |
| Alive                            | 35,859 (95.5)  | 45.31±13.51       |                  |                   |
| Deceased                         | 1686 (4.5)     |                   |                  | 69.88±14.28       |
| <b>Sex</b>                       |                |                   |                  |                   |
| Male                             | 32,722 (87.2)  | 47.68±14.56       | 1642 (97.4)      | 70.06±14.04       |
| Female                           | 4823 (12.8)    | 37.81±10.30       | 44 (2.6)         | 62.96±20.21       |
| <b>Age of beginning practice</b> |                |                   |                  |                   |
| age<30                           | 29,753 (79.2)  | 43.39±11.99       | 566 (33.6)       | 59.03±14.98       |
| 30≤age<40                        | 5573 (14.8)    | 52.28±14.10       | 472 (28.0)       | 73.81±11.92       |
| age≥40                           | 2219 (5.9)     | 74.24±10.91       | 648 (38.4)       | 76.37±8.62        |
| <b>Specialty</b>                 |                |                   |                  |                   |
| Surgeon                          | 4571 (12.2)    | 45.20±13.20       | 161 (9.5)        | 65.83±14.54       |
| Internist                        | 18,664 (49.7)  | 48.76±15.97       | 1190 (70.1)      | 71.92±12.70       |
| Dermatologist                    | 901 (2.4)      | 43.00±12.92       | 35 (2.1)         | 69.79±16.25       |
| Otolaryngologist                 | 2000 (5.3)     | 44.28±11.99       | 45 (2.7)         | 65.46±14.36       |
| Ophthalmologist                  | 1584 (4.2)     | 44.72±12.33       | 42 (2.5)         | 72.28±19.56       |
| Pathologist                      | 414 (1.1)      | 42.21±12.04       | 5 (0.3)          | 49.78±10.87       |
| Pediatrician                     | 2883 (7.7)     | 42.35±11.59       | 54 (3.2)         | 66.32±17.12       |

|                                |               |             |             |             |
|--------------------------------|---------------|-------------|-------------|-------------|
| Psychiatrist                   | 1214 (3.2)    | 40.37±11.81 | 21 (1.2)    | 61.85±20.52 |
| Radiologist                    | 1076 (2.9)    | 41.59±11.79 | 18 (1.1)    | 63.23±18.18 |
| Obstetrician                   | 2278 (6.1)    | 48.84±12.10 | 85 (5.0)    | 63.48±14.44 |
| Orthopedist                    | 1128 (3.0)    | 43.56±11.07 | 14 (0.8)    | 58.78±18.32 |
| Anesthesiologist               | 832 (2.2)     | 40.91±10.23 | 16 (0.9)    | 45.21±15.67 |
| <b>Region</b>                  |               |             |             |             |
| Northern                       | 18,046 (48.1) | 45.71±14.52 | 659 (39.1)  | 68.90±14.32 |
| Central                        | 7054 (18.8)   | 46.25±13.70 | 300 (17.8)  | 70.04±15.58 |
| Southern                       | 11,376 (30.3) | 47.64±14.81 | 667 (39.6)  | 70.97±13.57 |
| Eastern                        | 1069 (2.8)    | 46.24±14.12 | 60 (3.6)    | 67.67±13.96 |
| <b>Doctor-population ratio</b> |               |             |             |             |
| > 1 : 500                      | 17,185 (45.8) | 45.29±14.34 | 620 (36.8)  | 68.21±15.11 |
| 1 : 700 to 1 : 500             | 6429 (17.1)   | 45.55±14.50 | 285 (16.9)  | 69.71±14.19 |
| 1 : 900 to 1 : 700             | 11,233 (29.9) | 47.91±14.21 | 589 (34.9)  | 70.92±13.61 |
| < 1 : 900                      | 2698 (7.2)    | 51.08±14.53 | 192 (11.4)  | 71.90±13.02 |
| <b>Years of practice</b>       |               |             |             |             |
| Before 1995                    | 24,337 (64.8) | 53.62±12.71 | 1640 (97.3) | 70.60±13.52 |
| After 1995                     | 13,208 (35.2) | 33.13±5.06  | 46 (2.7)    | 44.28±16.86 |

**Table 3 -- The observed number of deaths and cause specific SMRs (standardized mortality ratios) for surgeons and anesthesiologists, using internists of Taiwan as the reference group.**

| Causes of death                                   | Surgeon |      |                    | Anesthesiologist |      |                 |
|---------------------------------------------------|---------|------|--------------------|------------------|------|-----------------|
|                                                   | O       | SMR  | 95%CI <sup>§</sup> | O                | SMR  | 95%CI           |
| <b>All causes</b>                                 | 161     | 1.15 | ( 0.98 - 1.34 )    | 16               | 1.62 | (0.93 - 2.64)   |
| <b>All malignant neoplasm<br/>(MN)</b>            | 37      | 0.84 | ( 0.59 - 1.16 )    | 5                | 1.57 | ( 0.51 - 3.66)  |
| MN of digestive organs and<br>peritoneum          | 13      | 0.54 | ( 0.29 - 0.92 )    | 2                | 1.18 | ( 0.14 - 4.26)  |
| MN of respiratory system                          | 11      | 1.16 | ( 0.58 - 2.07)     | 0                | 0.00 | ( 0.00 - 6.56)  |
| MN of urinary organs                              | 2       | 1.05 | ( 0.13 - 3.79)     | 0                | 0.00 | ( 0.00 - 20.42) |
| Neoplasm of lymphatic and<br>hematopoietic tissue | 8       | 2.17 | ( 0.94 - 4.28)     | 1                | 3.41 | ( 0.09 - 19.03) |
| MN of other and<br>unspecified sites              | 1       | 0.48 | ( 0.01 - 2.68)     | 2                | 8.73 | ( 1.06 - 31.53) |
| <b>Cerebrovascular disease</b>                    | 7       | 0.59 | ( 0.24 - 1.22)     | 3                | 3.95 | ( 0.82 - 11.55) |
| <b>Heart disease</b>                              | 9       | 0.83 | ( 0.38 - 1.57)     | 0                | 0.00 | ( 0.00 - 7.34)  |
| <b>Accidents</b>                                  | 11      | 1.81 | ( 0.90 - 3.24)     | 1                | 1.58 | ( 0.04 - 8.79)  |
| <b>Diabetes mellitus</b>                          | 8       | 1.49 | ( 0.65 - 2.94)     | 1                | 1.84 | ( 0.05 - 10.25) |
| <b>Chronic liver disease</b>                      | 7       | 1.60 | ( 0.64 - 3.30)     | 0                | 0.00 | ( 0.00 - 13.75) |
| <b>Kidney disease</b>                             | 1       | 0.36 | ( 0.01 - 2.01)     | 0                | 0.00 | ( 0.00 - 21.26) |
| <b>Pneumonia</b>                                  | 5       | 0.97 | ( 0.32 - 2.27)     | 0                | 0.00 | ( 0.00 - 12.23) |
| <b>Suicide</b>                                    | 3       | 1.36 | ( 0.28 - 3.98)     | 1                | 3.34 | ( 0.08 - 18.60) |



|                             |   |      |                |   |      |                 |
|-----------------------------|---|------|----------------|---|------|-----------------|
| <b>Chronic lung disease</b> | 4 | 2.19 | ( 0.60 - 5.60) | 0 | 0.00 | ( 0.00 -116.04) |
| <b>Hypertensive disease</b> | 2 | 1.45 | ( 0.18 - 5.25) | 0 | 0.00 | ( 0.00 - 30.76) |

<sup>§</sup> CI: confidence interval

For peer review only

**Table 4 -- Hazard ratios with 95% CI (confidence interval) estimated through Cox regression model to control relevant risk factors on mortality among Taiwan doctors from 1990 to 2006.**

| <b>Covariate</b>                 | <b>Hazard ratio</b> | <b>95% CI</b> |
|----------------------------------|---------------------|---------------|
| <b>Age of beginning practice</b> |                     |               |
|                                  | 1.12                | 1.12-1.13     |
| <b>Gender</b>                    |                     |               |
| Female/male                      | 0.76                | 0.56-1.02     |
| <b>Specialty</b>                 |                     |               |
| Dermatologist / Internist        | 1.19                | 0.85-1.67     |
| Otolaryngologist / Internist     | 0.85                | 0.63-1.15     |
| Ophthalmologist / Internist      | 0.72                | 0.53-0.98     |
| Pathologist/ Internist           | 0.81                | 0.33-1.94     |
| Pediatrician / Internist         | 0.91                | 0.69-1.20     |
| Psychiatrist / Internist         | 0.81                | 0.52-1.24     |
| Radiologist / Internist          | 0.87                | 0.55-1.39     |
| Surgeon / Internist              | 1.23                | 1.04-1.46     |
| Obstetrician / Internist         | 1.19                | 0.95-1.50     |
| Orthopedist / Internist          | 0.75                | 0.44-1.27     |
| Anesthesiologists/ Internist     | 1.97                | 1.20-3.25     |
| <b>Region</b>                    |                     |               |
| Central / Northern               | 1.12                | 0.97-1.29     |
| Southern / Northern              | 1.30                | 1.17-1.45     |
| Eastern / Northern               | 1.68                | 1.28-2.20     |
| <b>Doctor-population ratio</b>   |                     |               |

|                               |      |           |
|-------------------------------|------|-----------|
| 1 : 700 to 1 : 500 / >1 : 500 | 1.23 | 1.06-1.42 |
| 1 : 900 to 1 : 700 / >1 : 500 | 1.20 | 1.06-1.34 |
| <1 : 900 / >1 : 500           | 1.18 | 1.00-1.39 |

---

**Year of beginning practice**

---

|                        |      |           |
|------------------------|------|-----------|
| After 1995/ Before1995 | 6.17 | 4.27-8.92 |
|------------------------|------|-----------|

---

For peer review only

**WHAT IS ALREADY KNOWN ON THIS TOPIC**

All factors leading to health disparities are affecting people within respective locality.

**WHAT THIS STUDY ADDS**

All factors leading to health disparities also influence the mortality rates of healthcare providers, including doctors who practiced in such locality.

Increasing the numbers of doctors and/or improving the practice environment may be helpful in reducing the health disparities of both the general public and doctors residing in a region with poor resources.

For peer review only

1  
2  
3  
4 **Disparities in Mortality among Doctors in Taiwan:**  
5  
6  
7 **A 17-year follow-up study of 37,545 Doctors**  
8  
9

10  
11 Tung-Fu Shang<sup>1</sup>, Pau-Chung Chen<sup>2</sup>, Jung-Der Wang<sup>2,3</sup>  
12  
13

14 <sup>1</sup> *Bureau of International Cooperation, Department of Health, Executive Yuan, 36*  
15 *Tacheng St., Taipei City 103, Taiwan.*  
16

17 <sup>2</sup> *Institute of Occupational Medicine and Industrial Hygiene, National Taiwan*  
18 *University College of Public Health, 17 Xu-Zhou Rd., Taipei City 100, Taiwan*  
19

20 <sup>3</sup> *Department of Public Health, National Cheng Kung University College of Medicine,*  
21 *1 University Rd., Tainan 701, Taiwan.*  
22  
23

24  
25  
26 *\*Correspondence to: Jung-Der Wang, Department of Public Health, National Cheng*  
27 *Kung University College of Medicine, 1 University Rd., Tainan 701, Taiwan.*  
28

29  
30 Tel : +886-6-2353535 ext 5600

31  
32 Fax : +886-6-2359033

33  
34 E-mail: jdwang121@gmail.com  
35  
36  
37  
38  
39  
40  
41  
42  
43  
44  
45  
46  
47  
48  
49  
50  
51  
52  
53  
54  
55  
56  
57  
58  
59  
60

1  
2  
3  
4 **Objectives.** We used cohort data from the registry of all doctors in Taiwan to  
5 determine if the effect of health disparities exists after control of potential  
6 confounding by different occupational exposures in different specialties.  
7

8  
9  
10 **Design.** Retrospective cohort study, 1990-2006.

11  
12 **Settings.** The Taiwan Medical Association (TMA).

13  
14 **Participants.** A total of 37,545 doctors from the registry of the doctor file maintained  
15 by TMA. The registry has been required by the governmental regulation for  
16 verification of credentials of all practicing doctors.  
17  
18

19  
20 **Main outcome measures.** Cause-specific standardized mortality ratios (SMRs) for  
21 surgeons and anesthesiologists were compared to those of the internists. Cox's  
22 proportional hazard model was constructed to explore multiple risk factors for  
23 mortality, including specialties, age, gender, geographic region of practices, regional  
24 health resources, ages of beginning practices, and years of beginning practice.  
25  
26

27  
28 **Results.** The all-cause specific SMRs for surgeons and anesthesiologists were  
29 marginally elevated at 1.15 (95% confidence interval: 0.98-1.34) and 1.62 (95% CI:  
30 0.93-2.64) respectively. The Cox regression model showed that the anesthesiologists  
31 had the highest hazard ratio (HR) of 1.97, seconded by surgeons at 1.23. Localities  
32 with the doctor to population ratio lower than 1:500 were associated with an increased  
33 HR of doctor mortality.  
34  
35

36  
37 **Conclusions.** The doctor to population ratio and the region of practice may influence  
38 doctor's mortality. Increasing number of doctors and/or improving the practice  
39 environment may be helpful in reducing the health disparities in regions with poor  
40 resources.  
41  
42  
43  
44  
45  
46  
47  
48  
49  
50  
51  
52  
53  
54  
55  
56  
57  
58  
59  
60

## Article Summary

### Article focus

To determine if the effect of health disparities exists after control of potential confounding by different occupational exposures in different specialties.

### Key messages

- All factors leading to health disparities also influence the mortality rates of healthcare providers, including doctors who practiced in such locality.
- Increasing the numbers of doctors and/or improving the practice environment may be helpful in reducing the health disparities of both the general public and doctors residing in a region with poor resources.

### Strengths and limitations of this study

#### Strengths

- The cohort data includes all practicing doctors in Taiwan.
- We use internists as the reference population for SMR calculation to minimize the potential confounding by different socioeconomic states.

#### Limitations

- Possible misclassification of self-claimed specialty may be a source of bias while comparing the mortality rates among different specialties.
- Information was limited about the hospital level and location practiced, i.e., misclassification of the region of practice without differentiating primary/referral hospital and urban/rural setting.

1  
2  
3 During practices, health care providers have already been noted to suffer from certain  
4 specific potential hazards like stress, radiation, anesthetic gases or agents and  
5  
6 biologically hazardous blood or body fluids, which have been documented in many  
7  
8 previous studies among radiologists, pathologists, psychiatrists, dentists, and  
9  
10  
11  
12 anesthesiologists<sup>1-6</sup>.

14 Beginning in 1995, Taiwan launched the National Health Insurance (NHI)  
15  
16 program and attempted to mitigate the health disparity among the general population  
17  
18 living in different geographic regions. The provision of universal health care coverage  
19  
20 has increased the health care demand<sup>7-8</sup>. For example, the number of outpatient visits  
21  
22 per person increased from 10.56 in 1995 to 14.88 in 2008, and the numbers of  
23  
24 hospitalized patients and outpatient visits per doctor increased as well<sup>9-10</sup>. Thus, all  
25  
26 the healthcare professionals, including doctors, have encountered a heavier workload  
27  
28 and a greater psychosocial demand than before. However, a standardized mortality  
29  
30 ratio (SMR) study using the general population as the reference for comparison did  
31  
32 not detect any increased mortality among doctors in Taiwan<sup>11</sup>.

36 From an alternative perspective, the association between demographic  
37  
38 characteristics of human resources in health and the health of the population served  
39  
40 has received considerable attention<sup>12-13</sup>. There is a growing evidence that the density  
41  
42 of the health workforce is directly correlated with positive health outcomes in the  
43  
44 population they serve, such as maternity mortality, infant mortality and life  
45  
46 expectancy<sup>14</sup>. Other factors like geographic location, socioeconomic states and  
47  
48 distribution of current health care resources might also affect health outcome and  
49  
50  
51  
52  
53  
54  
55  
56  
57  
58  
59  
60  
incline to inter-correlate with each other.

As all factors leading to health disparities are affecting people within respective  
locality<sup>15</sup>, we hypothesized that they also influence the mortality rates of healthcare  
providers, including doctors who practiced in such locality. In the present study, we



1  
2  
3 used the cohort data from the registry of the doctor file maintained by the Taiwan  
4  
5 Medical Association (TMA) and recruited internists, the largest group, as referents to  
6  
7 determine if the effect of health disparities exists after control of potential  
8  
9 confounding by different occupational exposures in different specialties.  
10  
11  
12  
13  
14  
15  
16  
17  
18  
19  
20  
21  
22  
23  
24  
25  
26  
27  
28  
29  
30  
31  
32  
33  
34  
35  
36  
37  
38  
39  
40  
41  
42  
43  
44  
45  
46  
47  
48  
49  
50  
51  
52  
53  
54  
55  
56  
57  
58  
59  
60

For peer review only

## Methods

### Subjects and data collection

The retrospective cohort was established from the registry of the doctor file maintained by TMA. The registry has been required by the governmental regulation for verification of credentials of all practicing doctors. It contains the name of each individual, date and place of birth, gender, national identification number, medical school attended, date of graduation, self-designated specialty<sup>11</sup>, place of practice, vital status, date of death for decedents, and date of ceasing the membership. The cohort was established beginning in January 1990 and followed up to December 2006. Practice time was accrued until 2006, or the date of deceased or termination of membership. There were 29 decedents with incomplete information on date or month of death, of which this study assumed to be on the first day of the month or year. Since all practicing doctors must be registered in compliance to the Doctors Act in Taiwan, the dataset is very comprehensive and accurate.

### Statistical analysis

Geographic data in doctors per 10,000 persons, per capita disposable income (US\$), education, infant mortality rate (per 1000 live births), and life expectancy at birth were collected and analyzed from national statistics of the Directorate General of Budget, Accounting and Statistics (Taiwan) in 1998, 2002, and 2006. Geographic region was categorized into northern, central, southern and eastern region following the naming of branches of Bureau of National Health Insurance. Education indicated the percentage of people aged more than 15 who attained an education level of college or above.

All-cause and cause-specific standardized mortality ratios (SMRs) were obtained by employing the personal computer version of Life Table Analysis System (LTAS.NET). The LTAS was originally developed by the National Institute for

1  
2  
3  
4 Occupational Safety and Health (NIOSH) during the 1970s and was later converted  
5  
6 for use on Windows 98/NT/2000/XP-compatible PCs. This program tabulates the  
7  
8 underlying causes of death as well as the person-years of follow-up into age-, gender-,  
9  
10 and race-specific strata, and allows users to apply internal controls as referents to  
11  
12 replace general population from vital statistics. SMRs and 95% confidence intervals  
13  
14 (CIs) were calculated using the mortality rates of 119 underlying causes of death of  
15  
16 the internists of Taiwan as the reference group. We used SAS Version 9.1 (SAS  
17  
18 institute) to edit and analyze the data. In this study, we set the significance level at  
19  
20  $p=0.05$ .  
21  
22

23  
24 Cox regression analysis was conducted to determine the hazard ratios for the  
25  
26 following risk factors: age, gender, specialty, geographic region of practice, age of  
27  
28 beginning practice, calendar year of beginning practice (before or after 1995 when the  
29  
30 NHI system was established), and doctor to population ratio. The ratio between  
31  
32 doctors and population was categorized into 4 levels: larger than 1:500, from 1:500 to  
33  
34 1:700, from 1:700 to 1:900, and less than 1:900. Since the northern region of Taiwan  
35  
36 leads development for the last half a century, it was chosen to be the reference in the  
37  
38 statistical model. The covariates considered in the regression analysis were gender,  
39  
40 specialty, geographic region of practice, age of beginning practice, calendar year of  
41  
42 beginning practice, and doctor to population ratio. In Taiwan, some of our doctors  
43  
44 were veteran who took ad-hoc medical missions during the world II and did not  
45  
46 receive an academic medical education. They generally began their practices at an age  
47  
48 older than most other doctors and deserved for this study to control as a potential  
49  
50 confounder. We applied the stepwise strategy for variable selection with the  
51  
52 significance level for entry and the significance level for stay set to 0.15. Regression  
53  
54 diagnostics were also run, including examination of proportional hazard assumption,  
55  
56 residual analysis, detection of influential cases, and check for multi-co-linearity to  
57  
58  
59  
60

1  
2  
3  
4  
5  
6  
7  
8  
9  
10  
11  
12  
13  
14  
15  
16  
17  
18  
19  
20  
21  
22  
23  
24  
25  
26  
27  
28  
29  
30  
31  
32  
33  
34  
35  
36  
37  
38  
39  
40  
41  
42  
43  
44  
45  
46  
47  
48  
49  
50  
51  
52  
53  
54  
55  
56  
57  
58  
59  
60

assure the quality of analysis and goodness of fit for the model.

For peer review only

## Results

With the doctor to population ratio above 1:500 as the reference level, we found that a lower ratio significantly increased the hazard ratio (HR) of doctor mortality; there was also an independent effect of regional difference of higher HR for southern and eastern regions, as summarized in Table 4. The differences among localities seemed to correlate well with higher average levels of income and education, lower infant mortality rates, and longer life expectancies across Taiwan. And such disparities did not appear to have changed during the last decade (Table 1).

A total of 37,545 doctors were tabulated in the study from January 1990 to December 2006. During the above period, there were 1642 deaths among 32,713 male doctors and 44 deaths among 4822 female doctors. The overall mean age at death was  $69.88 \pm 14.28$  years old, with  $70.06 \pm 14.04$  for males and  $62.96 \pm 20.21$  for females, respectively. (Table 2) Approximately half (49.7%) of the cohort had been internists, 48.1% were practicing in the north region. Among all doctors, there were 30.8% working in the area of low doctor to population ratio. About two-thirds began their practice before 1995, and over 90% started practice at age below 40.

As for the control for socioeconomic status in the analysis, we used the internists as the reference population and found that the all cause specific SMRs for surgeons and anesthesiologists were marginally elevated with an SMR of 1.15 (95% CI: 0.98-1.34) and 1.62 (95% CI: 0.93-2.64), respectively (Table 3). Among the surgeons, the SMR of “Neoplasm of lymphatic and hematopoietic tissue” was increased but without statistical significance (SMR = 2.17, 95% CI: 0.94 to 4.28). The observed numbers of deaths from malignant neoplasm of digestive organs and peritoneum were significantly lower than corresponding expected values (SMR = 0.54,  $p < 0.05$ , 95% CI: 0.29 to 0.92). Among the anesthesiologists, the SMR of “malignant neoplasm of other and unspecified sites” was significantly increased (SMR = 8.73,  $p < 0.05$ , 95%

1  
2  
3  
4  
5  
6  
7  
8  
9  
10  
11  
12  
13  
14  
15  
16  
17  
18  
19  
20  
21  
22  
23  
24  
25  
26  
27  
28  
29  
30  
31  
32  
33  
34  
35  
36  
37  
38  
39  
40  
41  
42  
43  
44  
45  
46  
47  
48  
49  
50  
51  
52  
53  
54  
55  
56  
57  
58  
59  
60

CI: 1.06 to 31.53), although there were only 2 cases on the observed number.

To further adjust for other risk factors, the Cox regression model was constructed and the results were summarized in Table 4. The anesthesiologists appeared to show the highest hazard ratios (HRs) of 1.97 (95% CI, 1.20 to 3.25), followed by surgeons with a HR of 1.23 (95%CI, 1.04 to 1.46). The HR of ophthalmologists was significantly lower than all other specialists, of which the HR was 0.72 (95%CI, 0.53 to 0.98). In addition, doctors living in the northern region and the central region experienced lower HR's. And doctors who worked in the area with doctor to population ratio below 1:500 showed higher mortality or HR.

The doctors who began practice at an older age had a higher HR of 1.12 (95%CI, 1.12 to 1.13) for every single year increment. Overall, doctors who began practice after the implementation of NHI Program, or the year of 1995, showed a higher HR of 6.17 (95%CI, 4.27 to 8.92).

## Discussion

Based on Cox's Model analysis, we found doctors practicing in southern and eastern regions of Taiwan suffered from statistically significant premature mortality (Table 4), and such a geographic disparity appeared to correspond to the lower life expectancy and higher infant mortality rate in Taiwan (Table 1). To our limited knowledge, this study is the first to show that doctors practicing in the area of a low doctor to population ratio or in the less resourceful regions experienced a higher HR of mortality after adjustment for gender, age of beginning practice, and specialties (Table 4). Because doctors in Taiwan generally have higher earnings than all other segments of professionals and there is no upper limit of retirement age, we have decided to select "internal comparisons" among doctors with the same socioeconomic status, profession-related knowledge and health-related behaviour, to prevent confounding and would leave the effects of mortality to the other two main factors, occupational workload or practice environment.

Lowest average income, educational level and life expectancy, and the highest infant mortality rate in Taiwan were found in the eastern region (Table 1). Traditionally, this mountainous region impedes transportation tremendously, and plays a significant role in reduced healthcare accessibility for people, including health care providers themselves. Although the doctor to population ratio has improved since the promulgation of Medical Care Act in 1986 and implementation of NHI in 1995, doctors living in this region still suffer from a higher HR. It may indicate that the health disparity still exists. Moreover, in analyzing the central and southern regions, where similar levels of the average income and the education were found, a significantly increased hazard ratio was detected in the southern region only. As noted in Table 1, the doctor to population ratio has been consistently found to be lower in the southern region compared with those of the northern and central regions. These

1  
2  
3 findings indicate persistent health disparities in different regions of Taiwan, and  
4 suggest that occupational workloads might play some role in view of the increased  
5 mortality of doctors.  
6  
7  
8

9  
10 In a previous study, we found that the overall and cause-specific SMRs of doctors  
11 in Taiwan were less than 0.34 for different specialties<sup>11</sup>, which may have been  
12 confounded by using the general population as the referents for comparison<sup>16</sup>. In this  
13 study, we use internists as the reference population for SMR calculation to minimize  
14 the potential confounding by different socioeconomic states (Table 3). Although no  
15 increased mortality was found among radiologists, pathologists, and psychiatrists, as  
16 reported from other countries<sup>2-4</sup>, we detected significantly increased HRs for surgeons  
17 and anesthesiologists (Table 4). A further analysis only detected slightly elevated  
18 SMR for malignant neoplasm of lymphatic and hematopoietic tissues among surgeons,  
19 which appeared to corroborate the hazards of operation room reported by others<sup>17</sup>.  
20 However, the trend was less apparent because of the small sample size of  
21 anesthesiologists. Since the current mortality data in Taiwan only allowed for coding  
22 single underlying cause of death, it may further decrease the power of detection of  
23 occupational related illnesses.  
24  
25  
26  
27  
28  
29  
30  
31  
32  
33  
34  
35  
36  
37  
38  
39

40 Our study also demonstrated the HR of mortality was higher in the group  
41 beginning their practice since 1995, when the National Health Insurance system was  
42 implemented. This group belonged to a younger generation of doctors, who might  
43 possibly suffer from highly stressed work during their practice<sup>18</sup>. Such a stress might  
44 arise from their clinical training program or the newly implemented health policy.  
45 However, the cohort was established during 1990-2006, which may have imposed a  
46 selection of healthy survivors among the doctors. They began their practice before  
47 1995 in comparison with those who entered the workforce after 1995. Thus, more  
48 study is needed to explore the above hypothesis.  
49  
50  
51  
52  
53  
54  
55  
56  
57  
58  
59  
60



1  
2  
3  
4  
5  
6  
7  
8  
9  
10  
11  
12  
13  
14  
15  
16  
17  
18  
19  
20  
21  
22  
23  
24  
25  
26  
27  
28  
29  
30  
31  
32  
33  
34  
35  
36  
37  
38  
39  
40  
41  
42  
43  
44  
45  
46  
47  
48  
49  
50  
51  
52  
53  
54  
55  
56  
57  
58  
59  
60

Several limitations of this study should be noted. Firstly, possible misclassification of self-claimed specialty may be a source of bias while comparing the mortality rates among different specialties. For instance, a surgeon shifted to general practice after retiring from a medical center may result in overestimation of the practice duration and possible underestimation of the effect of specialty. Thus, the higher HR's among surgeons and anesthesiologists may need to be further studied for clarification. Secondly, information was limited about the hospital level and the locations which the doctor has practiced, i.e., misclassification of the region of practice without differentiating primary/referral hospital and urban/rural setting. Thus, we had to assume that it might be a random effect and only lead to the null or under-estimation.

In conclusion, disparities both in the geographic region of doctor's practice and the ratio of doctor to population regionally are the primary determinants to the HR of doctor mortality. Thus, we recommend increasing the number of doctors and improving the practice environment of eastern and southern regions of Taiwan, which may possibly mitigate the health disparities among doctors and people. Further, more studies are needed to explore and reduce the potential hazards among workplaces of anesthesiologists and surgeons in Taiwan.

## Acknowledgements

The authors express sincere appreciation to Taiwan Medical Association (TMA) for the maintenance of the relevant database. We also thank Dr. Fu-Chang Hu for his assistance in data analysis using SAS. The study was partially supported by a grant from the National Science Council of the Executive Yuan, Taiwan (No. NSC 99-2628-B-006-036-MY3). The sponsors had no role in the study design, data collection, data analyses, the interpretation of data, the writing of the report, or the decision to submit the article for publication.

## Contribution statement

The first author, Dr. Tung-Fu Shang, has acquired the dataset, designed the study together with Dr. Wang (the corresponding author), conducted the analysis under the full supervision and discussion with Drs. Chen and Wang, written the first draft, and all three participated in the revision of the later drafts until the final one.

Dr. Shang has access to all the data in the study and takes responsibility for the integrity of the data. Together with all co-authors, we shall be responsible for the accuracy of the data analysis, interpretation of the results.

## Competing interests:

All authors of this manuscript indicate no conflicts of interest and have complied with the Principles of Ethical Practice of Public Health. The Ethics Review Board of our institute (Institute of Occupational Medicine and Industrial Hygiene College of Public Health, National Taiwan University, Taiwan) approved the protocol before the commencement of this study.

## Funding

The study was partially supported by a grant from the National Science Council of the Executive Yuan, Taiwan (No. NSC 99-2628-B-006-036-MY3). The sponsors had no role in the study design, data collection, data analyses, the interpretation of data, the writing of the report, or the decision to submit the article for publication.

For peer review only

## References

1. Alexander BH, Checkoway H, Nagahama SI, Domino KB. Cause-specific mortality risks of anesthesiologists. *Anesthesiology* 2000;93(4):922-30.
2. Rich CL, Pitts FN. Suicide by psychiatrists: a study of medical specialists among 18,730 consecutive physician deaths during a five-year period, 1967-72. *J Clin Psychiatry* 1980;41:261-3.
3. Hall A, Harrington JM, Aw TC. Mortality study of British pathologists. *Am J Ind Med* 1991;20:83-9.
4. Logue JN, Barrick MK, Jessup GL, Jr. Mortality of radiologists and pathologists in the Radiation Registry of Physicians. *Journal of Occupational Medicine* 1986;28(2):91-9.
5. Hill GB, Harvey W. The mortality of dentists. *Br Dent J* 1972;132:179-82.
6. Doll R, Peto R. Mortality among doctors in different occupations. *British Medical Journal* 1977;1(6074):1433-6.
7. Cheng SH, Chiang TL. The Effect of Universal Health Insurance on Health Care Utilization in Taiwan. Results from a Natural Experiment. *JAMA* 1997;278:89-93.
8. Lu JR, Hsiao WC. Does Universal Health Insurance Make Health Care Unaffordable? Lessons from Taiwan. *Health Affairs* 2003;22:77-88.
9. National Health Insurance. Statistical Annual Report of Medical Care. Taipei: The ROC Department of Health; 2003.
10. Department of Health. Taiwan Public Health Report 2009. Taipei: The ROC Department of Health; 2010.
11. Shang TF, Chen PC, Wang JD. Mortality of Doctors in Taiwan, 1990-2006. *Occup Med (Lond)* 2010;60(8).
12. Anand S, Barnighausen T. Human resources and health outcomes: cross-country econometric study. *Lancet* 2004;364:1603-09.
13. Anyangwe SC, Mtonga C. Inequities in the Global Health Workforce: The Greatest Impediment to Health in Sub-Saharan Africa. *Int J Environ Res Public Health* 2007;4:93-100.
14. Högberg U. The World Health Report 2005: "make every mother and child count" - including Africans. *Scand J Public Health* 2005;33:409-11.
15. Division of Health Statistics. Mortality rate by local. Taipei: The ROC Department of Health; 2008.
16. Wang JD, Miettinen OS. Occupational mortality studies: principles of validity. *Scand J Work Environ Health* 1982;8:153-8.
17. Bruce DL, Eide KA, Linde HW, Eckenhoff JE. Causes of death among

- 1  
2  
3  
4  
5  
6  
7  
8  
9  
10  
11  
12  
13  
14  
15  
16  
17  
18  
19  
20  
21  
22  
23  
24  
25  
26  
27  
28  
29  
30  
31  
32  
33  
34  
35  
36  
37  
38  
39  
40  
41  
42  
43  
44  
45  
46  
47  
48  
49  
50  
51  
52  
53  
54  
55  
56  
57  
58  
59  
60
- anesthesiologists: A 20-year survey. *Anesthesiology* 1968;29:565-69.
18. British Medical Association. The morbidity and mortality of the medical profession. A literature review and suggestions for future research. London: British Medical Association; 1993.

For peer review only

**Table 1 -- Geographic disparities in doctors per 10,000 persons, per capita disposable income (US\$), education, infant mortality rate (per 1000 live births), and life expectancy at birth in 1998, 2002, and 2006.**

| Region   | Doctors per 10,000 persons |      |      | Per capita disposable income |        |        | Education <sup>§</sup> |      |      | Infant mortality rate |      |      | Life expectancy |      |      |
|----------|----------------------------|------|------|------------------------------|--------|--------|------------------------|------|------|-----------------------|------|------|-----------------|------|------|
|          | 1998                       | 2002 | 2006 | 1998                         | 2002   | 2006   | 1998                   | 2002 | 2006 | 1998                  | 2002 | 2006 | 1998            | 2002 | 2006 |
| Northern | 14.7                       | 16.5 | 17.4 | 8394.8                       | 8912.6 | 9853.0 | 24.8                   | 30.1 | 36.1 | 6.2                   | 4.9  | 4.4  | 77.4            | 78.6 | 79.5 |
| Central  | 14.1                       | 16.5 | 18.3 | 7044.2                       | 6940.0 | 7817.6 | 18.8                   | 23.2 | 28.6 | 6.9                   | 5.8  | 4.5  | 75.1            | 77.0 | 77.6 |
| Southern | 12.9                       | 14.5 | 16.5 | 6928.8                       | 7157.5 | 7891.2 | 18.4                   | 22.8 | 27.7 | 6.4                   | 5.4  | 4.8  | 74.7            | 76.0 | 76.5 |
| Eastern  | 13.3                       | 15.4 | 18.3 | 6542.2                       | 6683.0 | 7987.6 | 11.8                   | 14.4 | 20.0 | 12.4                  | 8.3  | 7.6  | 70.6            | 72.9 | 73.2 |

<sup>§</sup>**Education:** The percentage of people aged more than 15 attained an education level of college or above

Table 2 -- Characteristics of Taiwan doctors included in the study from 1990 to 2006.

|                                  | Taiwan doctors |                   | Deceased doctors |                   |
|----------------------------------|----------------|-------------------|------------------|-------------------|
|                                  | No. (%)        | mean censored age | No. (%)          | mean age at death |
| <b>Total</b>                     | 37,545 (100)   | 46.41±14.47       | 1686 (100)       | 69.88±14.28       |
| <b>Status</b>                    |                |                   |                  |                   |
| Alive                            | 35,859 (95.5)  | 45.31±13.51       |                  |                   |
| Deceased                         | 1686 (4.5)     |                   |                  | 69.88±14.28       |
| <b>Sex</b>                       |                |                   |                  |                   |
| Male                             | 32,722 (87.2)  | 47.68±14.56       | 1642 (97.4)      | 70.06±14.04       |
| Female                           | 4823 (12.8)    | 37.81±10.30       | 44 (2.6)         | 62.96±20.21       |
| <b>Age of beginning practice</b> |                |                   |                  |                   |
| age<30                           | 29,753 (79.2)  | 43.39±11.99       | 566 (33.6)       | 59.03±14.98       |
| 30≤age<40                        | 5573 (14.8)    | 52.28±14.10       | 472 (28.0)       | 73.81±11.92       |
| age≥40                           | 2219 (5.9)     | 74.24±10.91       | 648 (38.4)       | 76.37±8.62        |
| <b>Specialty</b>                 |                |                   |                  |                   |
| Surgeon                          | 4571 (12.2)    | 45.20±13.20       | 161 (9.5)        | 65.83±14.54       |
| Internist                        | 18,664 (49.7)  | 48.76±15.97       | 1190 (70.1)      | 71.92±12.70       |
| Dermatologist                    | 901 (2.4)      | 43.00±12.92       | 35 (2.1)         | 69.79±16.25       |
| Otolaryngologist                 | 2000 (5.3)     | 44.28±11.99       | 45 (2.7)         | 65.46±14.36       |
| Ophthalmologist                  | 1584 (4.2)     | 44.72±12.33       | 42 (2.5)         | 72.28±19.56       |
| Pathologist                      | 414 (1.1)      | 42.21±12.04       | 5 (0.3)          | 49.78±10.87       |
| Pediatrician                     | 2883 (7.7)     | 42.35±11.59       | 54 (3.2)         | 66.32±17.12       |

|                  |            |             |          |             |
|------------------|------------|-------------|----------|-------------|
| Psychiatrist     | 1214 (3.2) | 40.37±11.81 | 21 (1.2) | 61.85±20.52 |
| Radiologist      | 1076 (2.9) | 41.59±11.79 | 18 (1.1) | 63.23±18.18 |
| Obstetrician     | 2278 (6.1) | 48.84±12.10 | 85 (5.0) | 63.48±14.44 |
| Orthopedist      | 1128 (3.0) | 43.56±11.07 | 14 (0.8) | 58.78±18.32 |
| Anesthesiologist | 832 (2.2)  | 40.91±10.23 | 16 (0.9) | 45.21±15.67 |

---

**Region**


---

|          |               |             |            |             |
|----------|---------------|-------------|------------|-------------|
| Northern | 18,046 (48.1) | 45.71±14.52 | 659 (39.1) | 68.90±14.32 |
| Central  | 7054 (18.8)   | 46.25±13.70 | 300 (17.8) | 70.04±15.58 |
| Southern | 11,376 (30.3) | 47.64±14.81 | 667 (39.6) | 70.97±13.57 |
| Eastern  | 1069 (2.8)    | 46.24±14.12 | 60 (3.6)   | 67.67±13.96 |

---

**Doctor-population ratio**


---

|                    |               |             |            |             |
|--------------------|---------------|-------------|------------|-------------|
| > 1 : 500          | 17,185 (45.8) | 45.29±14.34 | 620 (36.8) | 68.21±15.11 |
| 1 : 700 to 1 : 500 | 6429 (17.1)   | 45.55±14.50 | 285 (16.9) | 69.71±14.19 |
| 1 : 900 to 1 : 700 | 11,233 (29.9) | 47.91±14.21 | 589 (34.9) | 70.92±13.61 |
| < 1 : 900          | 2698 (7.2)    | 51.08±14.53 | 192 (11.4) | 71.90±13.02 |

---

**Years of practice**


---

|             |               |             |             |             |
|-------------|---------------|-------------|-------------|-------------|
| Before 1995 | 24,337 (64.8) | 53.62±12.71 | 1640 (97.3) | 70.60±13.52 |
| After 1995  | 13,208 (35.2) | 33.13±5.06  | 46 (2.7)    | 44.28±16.86 |

---



**Table 3 -- The observed number of deaths and cause specific SMRs (standardized mortality ratios) for surgeons and anesthesiologists, using internists of Taiwan as the reference group.**

| Causes of death                                | Surgeon |      |                    | Anesthesiologist |      |                 |
|------------------------------------------------|---------|------|--------------------|------------------|------|-----------------|
|                                                | O       | SMR  | 95%CI <sup>§</sup> | O                | SMR  | 95%CI           |
| <b>All causes</b>                              | 161     | 1.15 | ( 0.98 - 1.34 )    | 16               | 1.62 | (0.93 - 2.64)   |
| <b>All malignant neoplasm</b>                  | 37      | 0.84 | ( 0.59 - 1.16 )    | 5                | 1.57 | ( 0.51 - 3.66)  |
| <b>(MN)</b>                                    |         |      |                    |                  |      |                 |
| MN of digestive organs and peritoneum          | 13      | 0.54 | ( 0.29 - 0.92 )    | 2                | 1.18 | ( 0.14 - 4.26)  |
| MN of respiratory system                       | 11      | 1.16 | ( 0.58 - 2.07)     | 0                | 0.00 | ( 0.00 - 6.56)  |
| MN of urinary organs                           | 2       | 1.05 | ( 0.13 - 3.79)     | 0                | 0.00 | ( 0.00 - 20.42) |
| Neoplasm of lymphatic and hematopoietic tissue | 8       | 2.17 | ( 0.94 - 4.28)     | 1                | 3.41 | ( 0.09 - 19.03) |
| MN of other and unspecified sites              | 1       | 0.48 | ( 0.01 - 2.68)     | 2                | 8.73 | ( 1.06 - 31.53) |
| <b>Cerebrovascular disease</b>                 | 7       | 0.59 | ( 0.24 - 1.22)     | 3                | 3.95 | ( 0.82 - 11.55) |
| <b>Heart disease</b>                           | 9       | 0.83 | ( 0.38 - 1.57)     | 0                | 0.00 | ( 0.00 - 7.34)  |
| <b>Accidents</b>                               | 11      | 1.81 | ( 0.90 - 3.24)     | 1                | 1.58 | ( 0.04 - 8.79)  |
| <b>Diabetes mellitus</b>                       | 8       | 1.49 | ( 0.65 - 2.94)     | 1                | 1.84 | ( 0.05 - 10.25) |
| <b>Chronic liver disease</b>                   | 7       | 1.60 | ( 0.64 - 3.30)     | 0                | 0.00 | ( 0.00 - 13.75) |
| <b>Kidney disease</b>                          | 1       | 0.36 | ( 0.01 - 2.01)     | 0                | 0.00 | ( 0.00 - 21.26) |
| <b>Pneumonia</b>                               | 5       | 0.97 | ( 0.32 - 2.27)     | 0                | 0.00 | ( 0.00 - 12.23) |
| <b>Suicide</b>                                 | 3       | 1.36 | ( 0.28 - 3.98)     | 1                | 3.34 | ( 0.08 - 18.60) |

1  
2  
3  
4  
5  
6  
7  
8  
9  
10  
11  
12  
13  
14  
15  
16  
17  
18  
19  
20  
21  
22  
23  
24  
25  
26  
27  
28  
29  
30  
31  
32  
33  
34  
35  
36  
37  
38  
39  
40  
41  
42  
43  
44  
45  
46  
47  
48  
49  
50  
51  
52  
53  
54  
55  
56  
57  
58  
59  
60

---

|                             |   |      |                |   |      |                 |
|-----------------------------|---|------|----------------|---|------|-----------------|
| <b>Chronic lung disease</b> | 4 | 2.19 | ( 0.60 - 5.60) | 0 | 0.00 | ( 0.00 -116.04) |
|-----------------------------|---|------|----------------|---|------|-----------------|

---

|                             |   |      |                |   |      |                 |
|-----------------------------|---|------|----------------|---|------|-----------------|
| <b>Hypertensive disease</b> | 2 | 1.45 | ( 0.18 - 5.25) | 0 | 0.00 | ( 0.00 - 30.76) |
|-----------------------------|---|------|----------------|---|------|-----------------|

---

<sup>§</sup> CI: confidence interval

For peer review only

**Table 4 -- Hazard ratios with 95% CI (confidence interval) estimated through Cox regression model to control relevant risk factors on mortality among Taiwan doctors from 1990 to 2006.**

| <b>Covariate</b>                 | <b>Hazard ratio</b> | <b>95% CI</b> |
|----------------------------------|---------------------|---------------|
| <b>Age of beginning practice</b> |                     |               |
|                                  | 1.12                | 1.12-1.13     |
| <b>Gender</b>                    |                     |               |
| Female/male                      | 0.76                | 0.56-1.02     |
| <b>Specialty</b>                 |                     |               |
| Dermatologist / Internist        | 1.19                | 0.85-1.67     |
| Otolaryngologist / Internist     | 0.85                | 0.63-1.15     |
| Ophthalmologist / Internist      | 0.72                | 0.53-0.98     |
| Pathologist/ Internist           | 0.81                | 0.33-1.94     |
| Pediatrician / Internist         | 0.91                | 0.69-1.20     |
| Psychiatrist / Internist         | 0.81                | 0.52-1.24     |
| Radiologist / Internist          | 0.87                | 0.55-1.39     |
| Surgeon / Internist              | 1.23                | 1.04-1.46     |
| Obstetrician / Internist         | 1.19                | 0.95-1.50     |
| Orthopedist / Internist          | 0.75                | 0.44-1.27     |
| Anesthesiologists/ Internist     | 1.97                | 1.20-3.25     |
| <b>Region</b>                    |                     |               |
| Central / Northern               | 1.12                | 0.97-1.29     |
| Southern / Northern              | 1.30                | 1.17-1.45     |
| Eastern / Northern               | 1.68                | 1.28-2.20     |
| <b>Doctor-population ratio</b>   |                     |               |

1  
2  
3  
4  
5  
6  
7  
8  
9  
10  
11  
12  
13  
14  
15  
16  
17  
18  
19  
20  
21  
22  
23  
24  
25  
26  
27  
28  
29  
30  
31  
32  
33  
34  
35  
36  
37  
38  
39  
40  
41  
42  
43  
44  
45  
46  
47  
48  
49  
50  
51  
52  
53  
54  
55  
56  
57  
58  
59  
60

|                                   |      |           |
|-----------------------------------|------|-----------|
| 1 : 700 to 1 : 500 / >1 : 500     | 1.23 | 1.06-1.42 |
| 1 : 900 to 1 : 700 / >1 : 500     | 1.20 | 1.06-1.34 |
| <1 : 900 / >1 : 500               | 1.18 | 1.00-1.39 |
| <b>Year of beginning practice</b> |      |           |
| After 1995/ Before1995            | 6.17 | 4.27-8.92 |

For peer review only

**WHAT IS ALREADY KNOWN ON THIS TOPIC**

All factors leading to health disparities are affecting people within respective locality.

**WHAT THIS STUDY ADDS**

All factors leading to health disparities also influence the mortality rates of healthcare providers, including doctors who practiced in such locality.

Increasing the numbers of doctors and/or improving the practice environment may be helpful in reducing the health disparities of both the general public and doctors residing in a region with poor resources.

For peer review only

STROBE 2007 (v4) Statement—Checklist of items that should be included in reports of *cohort studies*

| Section/Topic                | Item # | Recommendation                                                                                                                                                                       | Reported on page # |
|------------------------------|--------|--------------------------------------------------------------------------------------------------------------------------------------------------------------------------------------|--------------------|
| Title and abstract           | 1      | (a) Indicate the study's design with a commonly used term in the title or the abstract                                                                                               | 1-2                |
|                              |        | (b) Provide in the abstract an informative and balanced summary of what was done and what was found                                                                                  | 2                  |
| <b>Introduction</b>          |        |                                                                                                                                                                                      | <b>4-5</b>         |
| Background/rationale         | 2      | Explain the scientific background and rationale for the investigation being reported                                                                                                 | 4                  |
| Objectives                   | 3      | State specific objectives, including any prespecified hypotheses                                                                                                                     | 4-5                |
| <b>Methods</b>               |        |                                                                                                                                                                                      | <b>6-7</b>         |
| Study design                 | 4      | Present key elements of study design early in the paper                                                                                                                              | 6                  |
| Setting                      | 5      | Describe the setting, locations, and relevant dates, including periods of recruitment, exposure, follow-up, and data collection                                                      | 6                  |
| Participants                 | 6      | (a) Give the eligibility criteria, and the sources and methods of selection of participants. Describe methods of follow-up                                                           | 6                  |
|                              |        | (b) For matched studies, give matching criteria and number of exposed and unexposed                                                                                                  | 6                  |
| Variables                    | 7      | Clearly define all outcomes, exposures, predictors, potential confounders, and effect modifiers. Give diagnostic criteria, if applicable                                             | 6-7                |
| Data sources/<br>measurement | 8*     | For each variable of interest, give sources of data and details of methods of assessment (measurement). Describe comparability of assessment methods if there is more than one group | 6-7                |
| Bias                         | 9      | Describe any efforts to address potential sources of bias                                                                                                                            | 6-7                |
| Study size                   | 10     | Explain how the study size was arrived at                                                                                                                                            | 6                  |
| Quantitative variables       | 11     | Explain how quantitative variables were handled in the analyses. If applicable, describe which groupings were chosen and why                                                         | 6-7                |
| Statistical methods          | 12     | (a) Describe all statistical methods, including those used to control for confounding                                                                                                | 6-7                |
|                              |        | (b) Describe any methods used to examine subgroups and interactions                                                                                                                  | 6-7                |
|                              |        | (c) Explain how missing data were addressed                                                                                                                                          | 6                  |
|                              |        | (d) If applicable, explain how loss to follow-up was addressed                                                                                                                       |                    |
|                              |        | (e) Describe any sensitivity analyses                                                                                                                                                |                    |
| <b>Results</b>               |        |                                                                                                                                                                                      | <b>8-9</b>         |

|                          |     |                                                                                                                                                                                                              |       |
|--------------------------|-----|--------------------------------------------------------------------------------------------------------------------------------------------------------------------------------------------------------------|-------|
| Participants             | 13* | (a) Report numbers of individuals at each stage of study—eg numbers potentially eligible, examined for eligibility, confirmed eligible, included in the study, completing follow-up, and analysed            | 8     |
|                          |     | (b) Give reasons for non-participation at each stage                                                                                                                                                         |       |
|                          |     | (c) Consider use of a flow diagram                                                                                                                                                                           |       |
| Descriptive data         | 14* | (a) Give characteristics of study participants (eg demographic, clinical, social) and information on exposures and potential confounders                                                                     | 8     |
|                          |     | (b) Indicate number of participants with missing data for each variable of interest                                                                                                                          | 8     |
|                          |     | (c) Summarise follow-up time (eg, average and total amount)                                                                                                                                                  | 8     |
| Outcome data             | 15* | Report numbers of outcome events or summary measures over time                                                                                                                                               | 8-9   |
| Main results             | 16  | (a) Give unadjusted estimates and, if applicable, confounder-adjusted estimates and their precision (eg, 95% confidence interval). Make clear which confounders were adjusted for and why they were included | 8-9   |
|                          |     | (b) Report category boundaries when continuous variables were categorized                                                                                                                                    | 8-9   |
|                          |     | (c) If relevant, consider translating estimates of relative risk into absolute risk for a meaningful time period                                                                                             |       |
| Other analyses           | 17  | Report other analyses done—eg analyses of subgroups and interactions, and sensitivity analyses                                                                                                               | 8-9   |
| <b>Discussion</b>        |     |                                                                                                                                                                                                              | 10-11 |
| Key results              | 18  | Summarise key results with reference to study objectives                                                                                                                                                     | 10-11 |
| <b>Limitations</b>       |     |                                                                                                                                                                                                              | 11-12 |
| Interpretation           | 20  | Give a cautious overall interpretation of results considering objectives, limitations, multiplicity of analyses, results from similar studies, and other relevant evidence                                   | 11-12 |
| Generalisability         | 21  | Discuss the generalisability (external validity) of the study results                                                                                                                                        | 11-12 |
| <b>Other information</b> |     |                                                                                                                                                                                                              | 13    |
| Funding                  | 22  | Give the source of funding and the role of the funders for the present study and, if applicable, for the original study on which the present article is based                                                | 13    |

\*Give information separately for cases and controls in case-control studies and, if applicable, for exposed and unexposed groups in cohort and cross-sectional studies.

**Note:** An Explanation and Elaboration article discusses each checklist item and gives methodological background and published examples of transparent reporting. The STROBE checklist is best used in conjunction with this article (freely available on the Web sites of PLoS Medicine at <http://www.plosmedicine.org/>, Annals of Internal Medicine at <http://www.annals.org/>, and Epidemiology at <http://www.epidem.com/>). Information on the STROBE Initiative is available at [www.strobe-statement.org](http://www.strobe-statement.org).

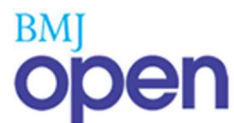

**Disparities in Mortality among Doctors in Taiwan: A 17-year follow-up study of 37,545 Doctors**

|                                 |                                                                                                                                                                                                                                                                                                                                               |
|---------------------------------|-----------------------------------------------------------------------------------------------------------------------------------------------------------------------------------------------------------------------------------------------------------------------------------------------------------------------------------------------|
| Journal:                        | <i>BMJ Open</i>                                                                                                                                                                                                                                                                                                                               |
| Manuscript ID:                  | bmjopen-2011-000382.R2                                                                                                                                                                                                                                                                                                                        |
| Article Type:                   | Research                                                                                                                                                                                                                                                                                                                                      |
| Date Submitted by the Author:   | 23-Jan-2012                                                                                                                                                                                                                                                                                                                                   |
| Complete List of Authors:       | Shang, Tung-Fu; Bureau of International Cooperation, Department of Health<br>Chen, Pau-Chung; Institute of Occupational Medicine and Industrial Hygiene, National Taiwan University College of Public Health<br>Wang, Jung-Der; Department of Public Health, National Cheng Kung University College of Medicine and Hospital, Taipei, TAIWAN, |
| <b>Primary Subject Heading</b>: | Epidemiology                                                                                                                                                                                                                                                                                                                                  |
| Secondary Subject Heading:      | Occupational and environmental medicine, Public health                                                                                                                                                                                                                                                                                        |
| Keywords:                       | Doctor, Disparity, Mortality                                                                                                                                                                                                                                                                                                                  |
|                                 |                                                                                                                                                                                                                                                                                                                                               |

SCHOLARONE™  
Manuscripts



# Disparities in Mortality among Doctors in Taiwan:

## A 17-year follow-up study of 37,545 Doctors

Tung-Fu Shang<sup>1</sup>, Pau-Chung Chen<sup>2</sup>, Jung-Der Wang<sup>2,3</sup>

<sup>1</sup> Bureau of International Cooperation, Department of Health, Executive Yuan, 36 Tacheng St., Taipei City 103, Taiwan.

<sup>2</sup> Institute of Occupational Medicine and Industrial Hygiene, National Taiwan University College of Public Health, 17 Xu-Zhou Rd., Taipei City 100, Taiwan

<sup>3</sup> Department of Public Health, National Cheng Kung University College of Medicine, 1 University Rd., Tainan 701, Taiwan.

\*Correspondence to: Jung-Der Wang, Department of Public Health, National Cheng Kung University College of Medicine, 1 University Rd., Tainan 701, Taiwan.

Tel : +886-6-2353535 ext 5600

Fax : +886-6-2359033

E-mail: jdwang121@gmail.com

1  
2  
3  
4 **Objectives.** We used cohort data from the registry of all doctors in Taiwan to  
5  
6 determine if the effect of health disparities exists after control of potential  
7  
8 confounding by different occupational exposures in different specialties.  
9

10 **Design.** Retrospective cohort study, 1990-2006.

11  
12 **Settings.** The Taiwan Medical Association (TMA).  
13

14 **Participants.** A total of 37,545 doctors from the registry of the doctor file maintained  
15  
16 by TMA. The registry has been required by the governmental regulation for  
17  
18 verification of credentials of all practicing doctors.  
19

20  
21 **Main outcome measures.** Cause-specific standardized mortality ratios (SMRs) for  
22  
23 surgeons and anesthesiologists were compared to those of the internists. Cox's  
24  
25 proportional hazard model was constructed to explore multiple risk factors for  
26  
27 mortality, including specialties, age, gender, geographic region of practices, regional  
28  
29 health resources, ages of beginning practices, and years of beginning practice.  
30

31  
32 **Results.** The all-cause specific SMRs for surgeons and anesthesiologists were  
33  
34 marginally elevated at 1.15 (95% confidence interval: 0.98-1.34) and 1.62 (95% CI:  
35  
36 0.93-2.64) respectively. The Cox regression model showed that the anesthesiologists  
37  
38 had the highest hazard ratio (HR) of 1.97, seconded by surgeons at 1.23. Localities  
39  
40 with the doctor to population ratio lower than 1:500 were associated with an increased  
41  
42 HR of doctor mortality.  
43

44  
45 **Conclusions.** The doctor to population ratio and the region of practice may influence  
46  
47 doctor's mortality. Increasing number of doctors and/or improving the practice  
48  
49 environment may be helpful in reducing the health disparities in regions with poor  
50  
51 resources.  
52  
53  
54  
55  
56  
57  
58  
59  
60

## Article Summary

### Article focus

To determine if the effect of health disparities exists after control of potential confounding by different occupational exposures in different specialties.

### Key messages

- All factors leading to health disparities also influence the mortality rates of healthcare providers, including doctors who practiced in such locality.
- Increasing the numbers of doctors and/or improving the practice environment may be helpful in reducing the health disparities of both the general public and doctors residing in a region with poor resources.

### Strengths and limitations of this study

#### Strengths

- The cohort data includes all practicing doctors in Taiwan.
- We use internists as the reference population for SMR calculation to minimize the potential confounding by different socioeconomic states.

#### Limitations

- Possible misclassification of self-claimed specialty may be a source of bias while comparing the mortality rates among different specialties.
- Information was limited about the hospital level and location practiced, i.e., misclassification of the region of practice without differentiating primary/referral hospital and urban/rural setting.

1  
2  
3  
4 During practices, health care providers have already been noted to suffer from certain  
5  
6 specific potential hazards like stress, radiation, anesthetic gases or agents and  
7  
8 biologically hazardous blood or body fluids, which have been documented in many  
9  
10 previous studies among radiologists, pathologists, psychiatrists, dentists, and  
11  
12 anesthesiologists<sup>1-6</sup>.

14 Beginning in 1995, Taiwan launched the National Health Insurance (NHI)  
15  
16 program and attempted to mitigate the health disparity among the general population  
17  
18 living in different geographic regions. The provision of universal health care coverage  
19  
20 has increased the health care demand<sup>7-8</sup>. For example, the number of outpatient visits  
21  
22 per person increased from 10.56 in 1995 to 14.88 in 2008, and the numbers of  
23  
24 hospitalized patients and outpatient visits per doctor increased as well<sup>9-10</sup>. Thus, all  
25  
26 the healthcare professionals, including doctors, have encountered a heavier workload  
27  
28 and a greater psychosocial demand than before. However, a standardized mortality  
29  
30 ratio (SMR) study using the general population as the reference for comparison did  
31  
32 not detect any increased mortality among doctors in Taiwan<sup>11</sup>.

36 From an alternative perspective, the association between demographic  
37  
38 characteristics of human resources in health and the health of the population served  
39  
40 has received considerable attention<sup>12-13</sup>. There is a growing evidence that the density  
41  
42 of the health workforce is directly correlated with positive health outcomes in the  
43  
44 population they serve, such as maternity mortality, infant mortality and life  
45  
46 expectancy<sup>14</sup>. Other factors like geographic location, socioeconomic states and  
47  
48 distribution of current health care resources might also affect health outcome and  
49  
50 incline to inter-correlate with each other.

53 As all factors leading to health disparities are affecting people within respective  
54  
55 locality<sup>15</sup>, we hypothesized that they also influence the mortality rates of healthcare  
56  
57 providers, including doctors who practiced in such locality. In the present study, we  
58  
59  
60

1  
2  
3 used the cohort data from the registry of the doctor file maintained by the Taiwan  
4  
5 Medical Association (TMA) and recruited internists, the largest group, as referents to  
6  
7 determine if the effect of health disparities exists after control of potential  
8  
9 confounding by different occupational exposures in different specialties.  
10  
11  
12  
13  
14  
15  
16  
17  
18  
19  
20  
21  
22  
23  
24  
25  
26  
27  
28  
29  
30  
31  
32  
33  
34  
35  
36  
37  
38  
39  
40  
41  
42  
43  
44  
45  
46  
47  
48  
49  
50  
51  
52  
53  
54  
55  
56  
57  
58  
59  
60

For peer review only

## Methods

### Subjects and data collection

The retrospective cohort was established from the registry of the doctor file maintained by TMA. The registry has been required by the governmental regulation for verification of credentials of all practicing doctors. It contains the name of each individual, date and place of birth, gender, national identification number, medical school attended, date of graduation, self-designated specialty<sup>11</sup>, place of practice, vital status, date of death for decedents, and date of ceasing the membership. The cohort was established beginning in January 1990 and followed up to December 2006. Practice time was accrued until 2006, or the date of deceased or termination of membership. There were 29 decedents with incomplete information on date or month of death, of which this study assumed to be on the first day of the month or year. Since all practicing doctors must be registered in compliance to the Doctors Act in Taiwan, the dataset is very comprehensive and accurate.

### Statistical analysis

Geographic data in doctors per 10,000 persons, per capita disposable income (US\$), education, infant mortality rate (per 1000 live births), and life expectancy at birth were collected and analyzed from national statistics of the Directorate General of Budget, Accounting and Statistics (Taiwan) in 1998, 2002, and 2006. Geographic region was categorized into northern, central, southern and eastern region following the naming of branches of Bureau of National Health Insurance. Education indicated the percentage of people aged more than 15 who attained an education level of college or above.

All-cause and cause-specific standardized mortality ratios (SMRs) were obtained by employing the personal computer version of Life Table Analysis System (LTAS.NET). The LTAS was originally developed by the National Institute for

1  
2  
3 Occupational Safety and Health (NIOSH) during the 1970s and was later converted  
4 for use on Windows 98/NT/2000/XP-compatible PCs. This program tabulates the  
5 underlying causes of death as well as the person-years of follow-up into age-, gender-,  
6 and race-specific strata, and allows users to apply internal controls as referents to  
7 replace general population from vital statistics. SMRs and 95% confidence intervals  
8 (CIs) were calculated using the mortality rates of 119 underlying causes of death of  
9 the internists of Taiwan as the reference group. We used SAS Version 9.1 (SAS  
10 institute) to edit and analyze the data. In this study, we set the significance level at  
11  $p=0.05$ .

12  
13  
14  
15  
16  
17  
18  
19  
20  
21  
22  
23  
24  
25  
26  
27  
28  
29  
30  
31  
32  
33  
34  
35  
36  
37  
38  
39  
40  
41  
42  
43  
44  
45  
46  
47  
48  
49  
50  
51  
52  
53  
54  
55  
56  
57  
58  
59  
60

Cox regression analysis was conducted to determine the hazard ratios for the following risk factors: age, gender, specialty, geographic region of practice, age of beginning practice, calendar year of beginning practice (before or after 1995 when the NHI system was established), and doctor to population ratio. The ratio between doctors and population was categorized into 4 levels: larger than 1:500, from 1:500 to 1:700, from 1:700 to 1:900, and less than 1:900. Since the northern region of Taiwan leads development for the last half a century, it was chosen to be the reference in the statistical model. The covariates considered in the regression analysis were gender, specialty, geographic region of practice, age of beginning practice, calendar year of beginning practice, and doctor to population ratio. In Taiwan, some of our doctors were veteran who took ad-hoc medical missions during the world II and did not receive an academic medical education. They generally began their practices at an age older than most other doctors and deserved for this study to control as a potential confounder. We applied the stepwise strategy for variable selection with the significance level for entry and the significance level for stay set to 0.15. Regression diagnostics were also run, including examination of proportional hazard assumption, residual analysis, detection of influential cases, and check for multi-co-linearity to

1  
2  
3 assure the quality of analysis and goodness of fit for the model.  
4  
5  
6  
7  
8  
9  
10  
11  
12  
13  
14  
15  
16  
17  
18  
19  
20  
21  
22  
23  
24  
25  
26  
27  
28  
29  
30  
31  
32  
33  
34  
35  
36  
37  
38  
39  
40  
41  
42  
43  
44  
45  
46  
47  
48  
49  
50  
51  
52  
53  
54  
55  
56  
57  
58  
59  
60

For peer review only



## Results

With the doctor to population ratio above 1:500 as the reference level, we found that a lower ratio significantly increased the hazard ratio (HR) of doctor mortality; there was also an independent effect of regional difference of higher HR for southern and eastern regions, as summarized in Table 4. The differences among localities seemed to correlate well with higher average levels of income and education, lower infant mortality rates, and longer life expectancies across Taiwan. And such disparities did not appear to have changed during the last decade (Table 1).

A total of 37,545 doctors were tabulated in the study from January 1990 to December 2006. During the above period, there were 1642 deaths among 32,713 male doctors and 44 deaths among 4822 female doctors. The overall mean age at death was  $69.88 \pm 14.28$  years old, with  $70.06 \pm 14.04$  for males and  $62.96 \pm 20.21$  for females, respectively. (Table 2) Approximately half (49.7%) of the cohort had been internists, 48.1% were practicing in the north region. Among all doctors, there were 30.8% working in the area of low doctor to population ratio. About two-thirds began their practice before 1995, and over 90% started practice at age below 40.

As for the control for socioeconomic status in the analysis, we used the internists as the reference population and found that the all cause specific SMRs for surgeons and anesthesiologists were marginally elevated with an SMR of 1.15 (95% CI: 0.98-1.34) and 1.62 (95% CI: 0.93-2.64), respectively (Table 3). Among the surgeons, the SMR of "Neoplasm of lymphatic and hematopoietic tissue" was increased but without statistical significance (SMR = 2.17, 95% CI: 0.94 to 4.28). The observed numbers of deaths from malignant neoplasm of digestive organs and peritoneum were significantly lower than corresponding expected values (SMR = 0.54,  $p < 0.05$ , 95% CI: 0.29 to 0.92). Among the anesthesiologists, the SMR of "malignant neoplasm of other and unspecified sites" was significantly increased (SMR = 8.73,  $p < 0.05$ , 95%

1  
2  
3  
4  
5  
6  
7  
8  
9  
10  
11  
12  
13  
14  
15  
16  
17  
18  
19  
20  
21  
22  
23  
24  
25  
26  
27  
28  
29  
30  
31  
32  
33  
34  
35  
36  
37  
38  
39  
40  
41  
42  
43  
44  
45  
46  
47  
48  
49  
50  
51  
52  
53  
54  
55  
56  
57  
58  
59  
60

CI: 1.06 to 31.53), although there were only 2 cases on the observed number.

To further adjust for other risk factors, the Cox regression model was constructed and the results were summarized in Table 4. The anesthesiologists appeared to show the highest hazard ratios (HRs) of 1.97 (95% CI, 1.20 to 3.25), followed by surgeons with a HR of 1.23 (95%CI, 1.04 to 1.46). The HR of ophthalmologists was significantly lower than all other specialists, of which the HR was 0.72 (95%CI, 0.53 to 0.98). In addition, doctors living in the northern region and the central region experienced lower HR's. And doctors who worked in the area with doctor to population ratio below 1:500 showed higher mortality or HR.

The doctors who began practice at an older age had a higher HR of 1.12 (95%CI, 1.12 to 1.13) for every single year increment. Overall, doctors who began practice after the implementation of NHI Program, or the year of 1995, showed a higher HR of 6.17 (95%CI, 4.27 to 8.92).

## Discussion

Based on Cox's Model analysis, we found doctors practicing in southern and eastern regions of Taiwan suffered from statistically significant premature mortality (Table 4), and such a geographic disparity appeared to correspond to the lower life expectancy and higher infant mortality rate in Taiwan (Table 1). To our limited knowledge, this study is the first to show that doctors practicing in the area of a low doctor to population ratio or in the less resourceful regions experienced a higher HR of mortality after adjustment for gender, age of beginning practice, and specialties (Table 4). Because doctors in Taiwan generally have higher earnings than all other segments of professionals and there is no upper limit of retirement age, we have decided to select "internal comparisons" among doctors with the same socioeconomic status, profession-related knowledge and health-related behaviour, to prevent confounding and would leave the effects of mortality to the other two main factors, occupational workload or practice environment. In addition to internists, we have tried to use surgeons as a possibly more homogeneous reference group and the hazard ratios of all covariates are the same except those of specialties, demonstrating a robust result for our inference.

Lowest average income, educational level and life expectancy, and the highest infant mortality rate in Taiwan were found in the eastern region (Table 1). Traditionally, this mountainous region impedes transportation tremendously, and plays a significant role in reduced healthcare accessibility for people, including health care providers themselves. Although the doctor to population ratio has improved since the promulgation of Medical Care Act in 1986 and implementation of NHI in 1995, doctors living in this region still suffer from a higher HR. It may indicate that the health disparity still exists. Moreover, in analyzing the central and southern regions, where similar levels of the average income and the education were found, a

1  
2  
3 significantly increased hazard ratio was detected in the southern region only. As noted  
4  
5 in Table 1, the doctor to population ratio has been consistently found to be lower in  
6  
7 the southern region compared with those of the northern and central regions. These  
8  
9 findings indicate persistent health disparities in different regions of Taiwan, and  
10  
11 suggest that occupational workloads might play some role in view of the increased  
12  
13 mortality of doctors.  
14

15  
16 In a previous study, we found that the overall and cause-specific SMRs of doctors  
17  
18 in Taiwan were less than 0.34 for different specialties<sup>11</sup>, which may have been  
19  
20 confounded by using the general population as the referents for comparison<sup>16</sup>. In this  
21  
22 study, we use internists as the reference population for SMR calculation to minimize  
23  
24 the potential confounding by different socioeconomic states (Table 3). Although no  
25  
26 increased mortality was found among radiologists, pathologists, and psychiatrists, as  
27  
28 reported from other countries<sup>2-4</sup>, we detected significantly increased HRs for surgeons  
29  
30 and anesthesiologists (Table 4). A further analysis only detected slightly elevated  
31  
32 SMR for malignant neoplasm of lymphatic and hematopoietic tissues among surgeons,  
33  
34 which appeared to corroborate the hazards of operation room reported by others<sup>17</sup>.  
35  
36 However, the trend was less apparent because of the small sample size of  
37  
38 anesthesiologists. Since the current mortality data in Taiwan only allowed for coding  
39  
40 single underlying cause of death, it may further decrease the power of detection of  
41  
42 occupational related illnesses.  
43  
44  
45

46  
47 Our study also demonstrated the HR of mortality was higher in the group  
48  
49 beginning their practice since 1995, when the National Health Insurance system was  
50  
51 implemented. This group belonged to a younger generation of doctors, who might  
52  
53 possibly suffer from highly stressed work during their practice<sup>18</sup>. Such a stress might  
54  
55 arise from their clinical training program or the newly implemented health policy.  
56  
57 However, the cohort was established during 1990-2006, which may have imposed a  
58  
59  
60

1  
2  
3 selection of healthy survivors among the doctors. They began their practice before  
4  
5 1995 in comparison with those who entered the workforce after 1995. Thus, more  
6  
7 study is needed to explore the above hypothesis.  
8  
9

10 Several limitations of this study should be noted. Firstly, possible  
11  
12 misclassification of self-claimed specialty may be a source of bias while comparing  
13  
14 the mortality rates among different specialties. For instance, a surgeon shifted to  
15  
16 general practice after retiring from a medical center may result in overestimation of  
17  
18 the practice duration and possible underestimation of the effect of specialty. Thus, the  
19  
20 higher HR's among surgeons and anesthesiologists may need to be further studied for  
21  
22 clarification. Secondly, information was limited about the hospital level and the  
23  
24 locations which the doctor has practiced, i.e., misclassification of the region of  
25  
26 practice without differentiating primary/referral hospital and urban/rural setting. Thus,  
27  
28 we had to assume that it might be a random effect and only lead to the null or  
29  
30 under-estimation.  
31  
32

33  
34 In conclusion, disparities both in the geographic region of doctor's practice and the  
35  
36 ratio of doctor to population regionally are the primary determinants to the HR of  
37  
38 doctor mortality. Thus, we recommend increasing the number of doctors and  
39  
40 improving the practice environment of eastern and southern regions of Taiwan, which  
41  
42 may possibly mitigate the health disparities among doctors and people. Further, more  
43  
44 studies are needed to explore and reduce the potential hazards among workplaces of  
45  
46 anesthesiologists and surgeons in Taiwan.  
47  
48  
49  
50  
51  
52  
53  
54  
55  
56  
57  
58  
59  
60

## Acknowledgements

The authors express sincere appreciation to Taiwan Medical Association (TMA) for the maintenance of the relevant database. We also thank Dr. Fu-Chang Hu for his assistance in data analysis using SAS. The study was partially supported by a grant from the National Science Council of the Executive Yuan, Taiwan (No. NSC 99-2628-B-006-036-MY3). The sponsors had no role in the study design, data collection, data analyses, the interpretation of data, the writing of the report, or the decision to submit the article for publication.

## Contribution statement

The first author, Dr. Tung-Fu Shang, has acquired the dataset, designed the study together with Dr. Wang (the corresponding author), conducted the analysis under the full supervision and discussion with Drs. Chen and Wang, written the first draft, and all three participated in the revision of the later drafts until the final one.

Dr. Shang has access to all the data in the study and takes responsibility for the integrity of the data. Together with all co-authors, we shall be responsible for the accuracy of the data analysis, interpretation of the results.

## Competing interests:

All authors of this manuscript indicate no conflicts of interest and have complied with the Principles of Ethical Practice of Public Health. The Ethics Review Board of our institute (Institute of Occupational Medicine and Industrial Hygiene College of Public Health, National Taiwan University, Taiwan) approved the protocol before the commencement of this study.

## Funding

The study was partially supported by a grant from the National Science Council of the Executive Yuan, Taiwan (No. NSC 99-2628-B-006-036-MY3). The sponsors had no role in the study design, data collection, data analyses, the interpretation of data, the writing of the report, or the decision to submit the article for publication.

## Data Sharing

We are willing to share our data in an open repository.

## References

1. Alexander BH, Checkoway H, Nagahama SI, Domino KB. Cause-specific mortality risks of anesthesiologists. *Anesthesiology* 2000;93(4):922-30.
2. Rich CL, Pitts FN. Suicide by psychiatrists: a study of medical specialists among 18,730 consecutive physician deaths during a five-year period, 1967-72. *J Clin Psychiatry* 1980;41:261-3.
3. Hall A, Harrington JM, Aw TC. Mortality study of British pathologists. *Am J Ind Med* 1991;20:83-9.
4. Logue JN, Barrick MK, Jessup GL, Jr. Mortality of radiologists and pathologists in the Radiation Registry of Physicians. *Journal of Occupational Medicine* 1986;28(2):91-9.
5. Hill GB, Harvey W. The mortality of dentists. *Br Dent J* 1972;132:179-82.
6. Doll R, Peto R. Mortality among doctors in different occupations. *British Medical Journal* 1977;1(6074):1433-6.
7. Cheng SH, Chiang TL. The Effect of Universal Health Insurance on Health Care Utilization in Taiwan. Results from a Natural Experiment. *JAMA* 1997;278:89-93.
8. Lu JR, Hsiao WC. Does Universal Health Insurance Make Health Care Unaffordable? Lessons from Taiwan. *Health Affairs* 2003;22:77-88.
9. National Health Insurance. Statistical Annual Report of Medical Care. Taipei: The ROC Department of Health; 2003.
10. Department of Health. Taiwan Public Health Report 2009. Taipei: The ROC Department of Health; 2010.
11. Shang TF, Chen PC, Wang JD. Mortality of Doctors in Taiwan, 1990-2006. *Occup Med (Lond)* 2010;60(8).
12. Anand S, Barnighausen T. Human resources and health outcomes: cross-country econometric study. *Lancet* 2004;364:1603-09.
13. Anyangwe SC, Mtonga C. Inequities in the Global Health Workforce: The Greatest Impediment to Health in Sub-Saharan Africa. *Int J Environ Res Public Health* 2007;4:93-100.
14. Högberg U. The World Health Report 2005: "make every mother and child count" - including Africans. *Scand J Public Health* 2005;33:409-11.
15. Division of Health Statistics. Mortality rate by local. Taipei: The ROC Department of Health; 2008.
16. Wang JD, Miettinen OS. Occupational mortality studies: principles of validity.



- 1  
2  
3 Scand J Work Environ Health 1982;8:153-8.  
4  
5 17. Bruce DL, Eide KA, Linde HW, Eckenhoff JE. Causes of death among  
6 anesthesiologists: A 20-year survey. Anesthesiology 1968;29:565-69.  
7  
8 18. British Medical Association. The morbidity and mortality of the medical  
9 profession. A literature review and suggestions for future research. London:  
10 British Medical Association; 1993.  
11  
12  
13  
14  
15  
16  
17  
18  
19  
20  
21  
22  
23  
24  
25  
26  
27  
28  
29  
30  
31  
32  
33  
34  
35  
36  
37  
38  
39  
40  
41  
42  
43  
44  
45  
46  
47  
48  
49  
50  
51  
52  
53  
54  
55  
56  
57  
58  
59  
60

For peer review only

**Table 1 -- Geographic disparities in doctors per 10,000 persons, per capita disposable income (US\$), education, infant mortality rate (per 1000 live births), and life expectancy at birth in 1998, 2002, and 2006.**

| Region   | Doctors per 10,000 persons |      |      | Per capita disposable income |        |        | Education <sup>§</sup> |      |      | Infant mortality rate |      |      | Life expectancy |      |      |
|----------|----------------------------|------|------|------------------------------|--------|--------|------------------------|------|------|-----------------------|------|------|-----------------|------|------|
|          | 1998                       | 2002 | 2006 | 1998                         | 2002   | 2006   | 1998                   | 2002 | 2006 | 1998                  | 2002 | 2006 | 1998            | 2002 | 2006 |
| Northern | 14.7                       | 16.5 | 17.4 | 8394.8                       | 8912.6 | 9853.0 | 24.8                   | 30.1 | 36.1 | 6.2                   | 4.9  | 4.4  | 77.4            | 78.6 | 79.5 |
| Central  | 14.1                       | 16.5 | 18.3 | 7044.2                       | 6940.0 | 7817.6 | 18.8                   | 23.2 | 28.6 | 6.9                   | 5.8  | 4.5  | 75.1            | 77.0 | 77.6 |
| Southern | 12.9                       | 14.5 | 16.5 | 6928.8                       | 7157.5 | 7891.2 | 18.4                   | 22.8 | 27.7 | 6.4                   | 5.4  | 4.8  | 74.7            | 76.0 | 76.5 |
| Eastern  | 13.3                       | 15.4 | 18.3 | 6542.2                       | 6683.0 | 7987.6 | 11.8                   | 14.4 | 20.0 | 12.4                  | 8.3  | 7.6  | 70.6            | 72.9 | 73.2 |

<sup>§</sup>**Education:** The percentage of people aged more than 15 attained an education level of college or above

Table 2 -- Characteristics of Taiwan doctors included in the study from 1990 to 2006.

|                                  | Taiwan doctors |                   | Deceased doctors |                   |
|----------------------------------|----------------|-------------------|------------------|-------------------|
|                                  | No. (%)        | mean censored age | No. (%)          | mean age at death |
| <b>Total</b>                     | 37,545 (100)   | 46.41±14.47       | 1686 (100)       | 69.88±14.28       |
| <b>Status</b>                    |                |                   |                  |                   |
| Alive                            | 35,859 (95.5)  | 45.31±13.51       |                  |                   |
| Deceased                         | 1686 (4.5)     |                   |                  | 69.88±14.28       |
| <b>Sex</b>                       |                |                   |                  |                   |
| Male                             | 32,722 (87.2)  | 47.68±14.56       | 1642 (97.4)      | 70.06±14.04       |
| Female                           | 4823 (12.8)    | 37.81±10.30       | 44 (2.6)         | 62.96±20.21       |
| <b>Age of beginning practice</b> |                |                   |                  |                   |
| age<30                           | 29,753 (79.2)  | 43.39±11.99       | 566 (33.6)       | 59.03±14.98       |
| 30≤age<40                        | 5573 (14.8)    | 52.28±14.10       | 472 (28.0)       | 73.81±11.92       |
| age≥40                           | 2219 (5.9)     | 74.24±10.91       | 648 (38.4)       | 76.37±8.62        |
| <b>Specialty</b>                 |                |                   |                  |                   |
| Surgeon                          | 4571 (12.2)    | 45.20±13.20       | 161 (9.5)        | 65.83±14.54       |
| Internist                        | 18,664 (49.7)  | 48.76±15.97       | 1190 (70.1)      | 71.92±12.70       |
| Dermatologist                    | 901 (2.4)      | 43.00±12.92       | 35 (2.1)         | 69.79±16.25       |
| Otolaryngologist                 | 2000 (5.3)     | 44.28±11.99       | 45 (2.7)         | 65.46±14.36       |
| Ophthalmologist                  | 1584 (4.2)     | 44.72±12.33       | 42 (2.5)         | 72.28±19.56       |
| Pathologist                      | 414 (1.1)      | 42.21±12.04       | 5 (0.3)          | 49.78±10.87       |
| Pediatrician                     | 2883 (7.7)     | 42.35±11.59       | 54 (3.2)         | 66.32±17.12       |

|                  |            |             |          |             |
|------------------|------------|-------------|----------|-------------|
| Psychiatrist     | 1214 (3.2) | 40.37±11.81 | 21 (1.2) | 61.85±20.52 |
| Radiologist      | 1076 (2.9) | 41.59±11.79 | 18 (1.1) | 63.23±18.18 |
| Obstetrician     | 2278 (6.1) | 48.84±12.10 | 85 (5.0) | 63.48±14.44 |
| Orthopedist      | 1128 (3.0) | 43.56±11.07 | 14 (0.8) | 58.78±18.32 |
| Anesthesiologist | 832 (2.2)  | 40.91±10.23 | 16 (0.9) | 45.21±15.67 |

### Region

|          |               |             |            |             |
|----------|---------------|-------------|------------|-------------|
| Northern | 18,046 (48.1) | 45.71±14.52 | 659 (39.1) | 68.90±14.32 |
| Central  | 7054 (18.8)   | 46.25±13.70 | 300 (17.8) | 70.04±15.58 |
| Southern | 11,376 (30.3) | 47.64±14.81 | 667 (39.6) | 70.97±13.57 |
| Eastern  | 1069 (2.8)    | 46.24±14.12 | 60 (3.6)   | 67.67±13.96 |

### Doctor-population ratio

|                    |               |             |            |             |
|--------------------|---------------|-------------|------------|-------------|
| > 1 : 500          | 17,185 (45.8) | 45.29±14.34 | 620 (36.8) | 68.21±15.11 |
| 1 : 700 to 1 : 500 | 6429 (17.1)   | 45.55±14.50 | 285 (16.9) | 69.71±14.19 |
| 1 : 900 to 1 : 700 | 11,233 (29.9) | 47.91±14.21 | 589 (34.9) | 70.92±13.61 |
| < 1 : 900          | 2698 (7.2)    | 51.08±14.53 | 192 (11.4) | 71.90±13.02 |

### Years of practice

|             |               |             |             |             |
|-------------|---------------|-------------|-------------|-------------|
| Before 1995 | 24,337 (64.8) | 53.62±12.71 | 1640 (97.3) | 70.60±13.52 |
| After 1995  | 13,208 (35.2) | 33.13±5.06  | 46 (2.7)    | 44.28±16.86 |

**Table 3 -- The observed number of deaths and cause specific SMRs (standardized mortality ratios) for surgeons and anesthesiologists, using internists of Taiwan as the reference group.**

| Causes of death                                   | Surgeon |      |                    | Anesthesiologist |      |                 |
|---------------------------------------------------|---------|------|--------------------|------------------|------|-----------------|
|                                                   | O       | SMR  | 95%CI <sup>§</sup> | O                | SMR  | 95%CI           |
| <b>All causes</b>                                 | 161     | 1.15 | ( 0.98 - 1.34 )    | 16               | 1.62 | (0.93 - 2.64)   |
| <b>All malignant neoplasm<br/>(MN)</b>            | 37      | 0.84 | ( 0.59 - 1.16 )    | 5                | 1.57 | ( 0.51 - 3.66)  |
| MN of digestive organs and<br>peritoneum          | 13      | 0.54 | ( 0.29 - 0.92 )    | 2                | 1.18 | ( 0.14 - 4.26)  |
| MN of respiratory system                          | 11      | 1.16 | ( 0.58 - 2.07 )    | 0                | 0.00 | ( 0.00 - 6.56)  |
| MN of urinary organs                              | 2       | 1.05 | ( 0.13 - 3.79 )    | 0                | 0.00 | ( 0.00 - 20.42) |
| Neoplasm of lymphatic and<br>hematopoietic tissue | 8       | 2.17 | ( 0.94 - 4.28 )    | 1                | 3.41 | ( 0.09 - 19.03) |
| MN of other and<br>unspecified sites              | 1       | 0.48 | ( 0.01 - 2.68 )    | 2                | 8.73 | ( 1.06 - 31.53) |
| <b>Cerebrovascular disease</b>                    | 7       | 0.59 | ( 0.24 - 1.22 )    | 3                | 3.95 | ( 0.82 - 11.55) |
| <b>Heart disease</b>                              | 9       | 0.83 | ( 0.38 - 1.57 )    | 0                | 0.00 | ( 0.00 - 7.34)  |
| <b>Accidents</b>                                  | 11      | 1.81 | ( 0.90 - 3.24 )    | 1                | 1.58 | ( 0.04 - 8.79)  |
| <b>Diabetes mellitus</b>                          | 8       | 1.49 | ( 0.65 - 2.94 )    | 1                | 1.84 | ( 0.05 - 10.25) |
| <b>Chronic liver disease</b>                      | 7       | 1.60 | ( 0.64 - 3.30 )    | 0                | 0.00 | ( 0.00 - 13.75) |
| <b>Kidney disease</b>                             | 1       | 0.36 | ( 0.01 - 2.01 )    | 0                | 0.00 | ( 0.00 - 21.26) |
| <b>Pneumonia</b>                                  | 5       | 0.97 | ( 0.32 - 2.27 )    | 0                | 0.00 | ( 0.00 - 12.23) |
| <b>Suicide</b>                                    | 3       | 1.36 | ( 0.28 - 3.98 )    | 1                | 3.34 | ( 0.08 - 18.60) |

|                             |   |      |                |   |      |                 |
|-----------------------------|---|------|----------------|---|------|-----------------|
| <b>Chronic lung disease</b> | 4 | 2.19 | ( 0.60 - 5.60) | 0 | 0.00 | ( 0.00 -116.04) |
| <b>Hypertensive disease</b> | 2 | 1.45 | ( 0.18 - 5.25) | 0 | 0.00 | ( 0.00 - 30.76) |

<sup>§</sup> CI: confidence interval

For peer review only

**Table 4 -- Hazard ratios with 95% CI (confidence interval) estimated through Cox regression model to control relevant risk factors on mortality among Taiwan doctors from 1990 to 2006.**

| <b>Covariate</b>                 | <b>Hazard ratio</b> | <b>95% CI</b> |
|----------------------------------|---------------------|---------------|
| <b>Age of beginning practice</b> |                     |               |
|                                  | 1.12                | 1.12-1.13     |
| <b>Gender</b>                    |                     |               |
| Female/male                      | 0.76                | 0.56-1.02     |
| <b>Specialty</b>                 |                     |               |
| Dermatologist / Internist        | 1.19                | 0.85-1.67     |
| Otolaryngologist / Internist     | 0.85                | 0.63-1.15     |
| Ophthalmologist / Internist      | 0.72                | 0.53-0.98     |
| Pathologist/ Internist           | 0.81                | 0.33-1.94     |
| Pediatrician / Internist         | 0.91                | 0.69-1.20     |
| Psychiatrist / Internist         | 0.81                | 0.52-1.24     |
| Radiologist / Internist          | 0.87                | 0.55-1.39     |
| Surgeon / Internist              | 1.23                | 1.04-1.46     |
| Obstetrician / Internist         | 1.19                | 0.95-1.50     |
| Orthopedist / Internist          | 0.75                | 0.44-1.27     |
| Anesthesiologists/ Internist     | 1.97                | 1.20-3.25     |
| <b>Region</b>                    |                     |               |
| Central / Northern               | 1.12                | 0.97-1.29     |
| Southern / Northern              | 1.30                | 1.17-1.45     |
| Eastern / Northern               | 1.68                | 1.28-2.20     |
| <b>Doctor-population ratio</b>   |                     |               |

|                               |      |           |
|-------------------------------|------|-----------|
| 1 : 700 to 1 : 500 / >1 : 500 | 1.23 | 1.06-1.42 |
| 1 : 900 to 1 : 700 / >1 : 500 | 1.20 | 1.06-1.34 |
| <1 : 900 / >1 : 500           | 1.18 | 1.00-1.39 |

---

**Year of beginning practice**

---

|                        |      |           |
|------------------------|------|-----------|
| After 1995/ Before1995 | 6.17 | 4.27-8.92 |
|------------------------|------|-----------|

---

For peer review only



**WHAT IS ALREADY KNOWN ON THIS TOPIC**

All factors leading to health disparities are affecting people within respective locality.

**WHAT THIS STUDY ADDS**

All factors leading to health disparities also influence the mortality rates of healthcare providers, including doctors who practiced in such locality.

Increasing the numbers of doctors and/or improving the practice environment may be helpful in reducing the health disparities of both the general public and doctors residing in a region with poor resources.

For peer review only

1  
2  
3  
4 **Disparities in Mortality among Doctors in Taiwan:**  
5  
6  
7 **A 17-year follow-up study of 37,545 Doctors**  
8  
9

10  
11 Tung-Fu Shang<sup>1</sup>, Pau-Chung Chen<sup>2</sup>, Jung-Der Wang<sup>2,3</sup>  
12

13  
14 <sup>1</sup> *Bureau of International Cooperation, Department of Health, Executive Yuan, 36*  
15 *Tacheng St., Taipei City 103, Taiwan.*  
16

17  
18 <sup>2</sup> *Institute of Occupational Medicine and Industrial Hygiene, National Taiwan*  
19 *University College of Public Health, 17 Xu-Zhou Rd., Taipei City 100, Taiwan*  
20

21  
22 <sup>3</sup> *Department of Public Health, National Cheng Kung University College of Medicine,*  
23 *1 University Rd., Tainan 701, Taiwan.*  
24

25  
26 *\*Correspondence to: Jung-Der Wang, Department of Public Health, National Cheng*  
27 *Kung University College of Medicine, 1 University Rd., Tainan 701, Taiwan.*  
28

29  
30 Tel : +886-6-2353535 ext 5600

31  
32 Fax : +886-6-2359033

33  
34 E-mail: jdwang121@gmail.com  
35  
36  
37  
38  
39  
40  
41  
42  
43  
44  
45  
46  
47  
48  
49  
50  
51  
52  
53  
54  
55  
56  
57  
58  
59  
60

1  
2  
3  
4 **Objectives.** We used cohort data from the registry of all doctors in Taiwan to  
5  
6 determine if the effect of health disparities exists after control of potential  
7  
8 confounding by different occupational exposures in different specialties.  
9

10 **Design.** Retrospective cohort study, 1990-2006.

11  
12 **Settings.** The Taiwan Medical Association (TMA).

13  
14 **Participants.** A total of 37,545 doctors from the registry of the doctor file maintained  
15  
16 by TMA. The registry has been required by the governmental regulation for  
17  
18 verification of credentials of all practicing doctors.  
19

20  
21 **Main outcome measures.** Cause-specific standardized mortality ratios (SMRs) for  
22  
23 surgeons and anesthesiologists were compared to those of the internists. Cox's  
24  
25 proportional hazard model was constructed to explore multiple risk factors for  
26  
27 mortality, including specialties, age, gender, geographic region of practices, regional  
28  
29 health resources, ages of beginning practices, and years of beginning practice.  
30

31  
32 **Results.** The all-cause specific SMRs for surgeons and anesthesiologists were  
33  
34 marginally elevated at 1.15 (95% confidence interval: 0.98-1.34) and 1.62 (95% CI:  
35  
36 0.93-2.64) respectively. The Cox regression model showed that the anesthesiologists  
37  
38 had the highest hazard ratio (HR) of 1.97, seconded by surgeons at 1.23. Localities  
39  
40 with the doctor to population ratio lower than 1:500 were associated with an increased  
41  
42 HR of doctor mortality.  
43

44  
45 **Conclusions.** The doctor to population ratio and the region of practice may influence  
46  
47 doctor's mortality. Increasing number of doctors and/or improving the practice  
48  
49 environment may be helpful in reducing the health disparities in regions with poor  
50  
51 resources.  
52  
53  
54  
55  
56  
57  
58  
59  
60

## Article Summary

### Article focus

To determine if the effect of health disparities exists after control of potential confounding by different occupational exposures in different specialties.

### Key messages

- All factors leading to health disparities also influence the mortality rates of healthcare providers, including doctors who practiced in such locality.
- Increasing the numbers of doctors and/or improving the practice environment may be helpful in reducing the health disparities of both the general public and doctors residing in a region with poor resources.

### Strengths and limitations of this study

#### Strengths

- The cohort data includes all practicing doctors in Taiwan.
- We use internists as the reference population for SMR calculation to minimize the potential confounding by different socioeconomic states.

#### Limitations

- Possible misclassification of self-claimed specialty may be a source of bias while comparing the mortality rates among different specialties.
- Information was limited about the hospital level and location practiced, i.e., misclassification of the region of practice without differentiating primary/referral hospital and urban/rural setting.

1  
2  
3 During practices, health care providers have already been noted to suffer from certain  
4 specific potential hazards like stress, radiation, anesthetic gases or agents and  
5  
6 biologically hazardous blood or body fluids, which have been documented in many  
7  
8 previous studies among radiologists, pathologists, psychiatrists, dentists, and  
9  
10  
11  
12 anesthesiologists<sup>1-6</sup>.

14 Beginning in 1995, Taiwan launched the National Health Insurance (NHI)  
15  
16 program and attempted to mitigate the health disparity among the general population  
17  
18 living in different geographic regions. The provision of universal health care coverage  
19  
20 has increased the health care demand<sup>7-8</sup>. For example, the number of outpatient visits  
21  
22 per person increased from 10.56 in 1995 to 14.88 in 2008, and the numbers of  
23  
24 hospitalized patients and outpatient visits per doctor increased as well<sup>9-10</sup>. Thus, all  
25  
26 the healthcare professionals, including doctors, have encountered a heavier workload  
27  
28 and a greater psychosocial demand than before. However, a standardized mortality  
29  
30 ratio (SMR) study using the general population as the reference for comparison did  
31  
32 not detect any increased mortality among doctors in Taiwan<sup>11</sup>.

36 From an alternative perspective, the association between demographic  
37  
38 characteristics of human resources in health and the health of the population served  
39  
40 has received considerable attention<sup>12-13</sup>. There is a growing evidence that the density  
41  
42 of the health workforce is directly correlated with positive health outcomes in the  
43  
44 population they serve, such as maternity mortality, infant mortality and life  
45  
46 expectancy<sup>14</sup>. Other factors like geographic location, socioeconomic states and  
47  
48 distribution of current health care resources might also affect health outcome and  
49  
50  
51  
52 incline to inter-correlate with each other.

53 As all factors leading to health disparities are affecting people within respective  
54  
55 locality<sup>15</sup>, we hypothesized that they also influence the mortality rates of healthcare  
56  
57 providers, including doctors who practiced in such locality. In the present study, we  
58  
59  
60

1  
2  
3 used the cohort data from the registry of the doctor file maintained by the Taiwan  
4  
5 Medical Association (TMA) and recruited internists, the largest group, as referents to  
6  
7 determine if the effect of health disparities exists after control of potential  
8  
9 confounding by different occupational exposures in different specialties.  
10  
11  
12  
13  
14  
15  
16  
17  
18  
19  
20  
21  
22  
23  
24  
25  
26  
27  
28  
29  
30  
31  
32  
33  
34  
35  
36  
37  
38  
39  
40  
41  
42  
43  
44  
45  
46  
47  
48  
49  
50  
51  
52  
53  
54  
55  
56  
57  
58  
59  
60

For peer review only

## Methods

### Subjects and data collection

The retrospective cohort was established from the registry of the doctor file maintained by TMA. The registry has been required by the governmental regulation for verification of credentials of all practicing doctors. It contains the name of each individual, date and place of birth, gender, national identification number, medical school attended, date of graduation, self-designated specialty<sup>11</sup>, place of practice, vital status, date of death for decedents, and date of ceasing the membership. The cohort was established beginning in January 1990 and followed up to December 2006. Practice time was accrued until 2006, or the date of deceased or termination of membership. There were 29 decedents with incomplete information on date or month of death, of which this study assumed to be on the first day of the month or year. Since all practicing doctors must be registered in compliance to the Doctors Act in Taiwan, the dataset is very comprehensive and accurate.

### Statistical analysis

Geographic data in doctors per 10,000 persons, per capita disposable income (US\$), education, infant mortality rate (per 1000 live births), and life expectancy at birth were collected and analyzed from national statistics of the Directorate General of Budget, Accounting and Statistics (Taiwan) in 1998, 2002, and 2006. Geographic region was categorized into northern, central, southern and eastern region following the naming of branches of Bureau of National Health Insurance. Education indicated the percentage of people aged more than 15 who attained an education level of college or above.

All-cause and cause-specific standardized mortality ratios (SMRs) were obtained by employing the personal computer version of Life Table Analysis System (LTAS.NET). The LTAS was originally developed by the National Institute for

1  
2  
3 Occupational Safety and Health (NIOSH) during the 1970s and was later converted  
4 for use on Windows 98/NT/2000/XP-compatible PCs. This program tabulates the  
5 underlying causes of death as well as the person-years of follow-up into age-, gender-,  
6 and race-specific strata, and allows users to apply internal controls as referents to  
7 replace general population from vital statistics. SMRs and 95% confidence intervals  
8 (CIs) were calculated using the mortality rates of 119 underlying causes of death of  
9 the internists of Taiwan as the reference group. We used SAS Version 9.1 (SAS  
10 institute) to edit and analyze the data. In this study, we set the significance level at  
11  $p=0.05$ .

12  
13  
14  
15  
16  
17  
18  
19  
20  
21  
22  
23  
24  
25  
26  
27  
28  
29  
30  
31  
32  
33  
34  
35  
36  
37  
38  
39  
40  
41  
42  
43  
44  
45  
46  
47  
48  
49  
50  
51  
52  
53  
54  
55  
56  
57  
58  
59  
60

Cox regression analysis was conducted to determine the hazard ratios for the following risk factors: age, gender, specialty, geographic region of practice, age of beginning practice, calendar year of beginning practice (before or after 1995 when the NHI system was established), and doctor to population ratio. The ratio between doctors and population was categorized into 4 levels: larger than 1:500, from 1:500 to 1:700, from 1:700 to 1:900, and less than 1:900. Since the northern region of Taiwan leads development for the last half a century, it was chosen to be the reference in the statistical model. The covariates considered in the regression analysis were gender, specialty, geographic region of practice, age of beginning practice, calendar year of beginning practice, and doctor to population ratio. In Taiwan, some of our doctors were veteran who took ad-hoc medical missions during the world II and did not receive an academic medical education. They generally began their practices at an age older than most other doctors and deserved for this study to control as a potential confounder. We applied the stepwise strategy for variable selection with the significance level for entry and the significance level for stay set to 0.15. Regression diagnostics were also run, including examination of proportional hazard assumption, residual analysis, detection of influential cases, and check for multi-co-linearity to



1  
2  
3  
4  
5  
6  
7  
8  
9  
10  
11  
12  
13  
14  
15  
16  
17  
18  
19  
20  
21  
22  
23  
24  
25  
26  
27  
28  
29  
30  
31  
32  
33  
34  
35  
36  
37  
38  
39  
40  
41  
42  
43  
44  
45  
46  
47  
48  
49  
50  
51  
52  
53  
54  
55  
56  
57  
58  
59  
60

assure the quality of analysis and goodness of fit for the model.

For peer review only

## Results

With the doctor to population ratio above 1:500 as the reference level, we found that a lower ratio significantly increased the hazard ratio (HR) of doctor mortality; there was also an independent effect of regional difference of higher HR for southern and eastern regions, as summarized in Table 4. The differences among localities seemed to correlate well with higher average levels of income and education, lower infant mortality rates, and longer life expectancies across Taiwan. And such disparities did not appear to have changed during the last decade (Table 1).

A total of 37,545 doctors were tabulated in the study from January 1990 to December 2006. During the above period, there were 1642 deaths among 32,713 male doctors and 44 deaths among 4822 female doctors. The overall mean age at death was  $69.88 \pm 14.28$  years old, with  $70.06 \pm 14.04$  for males and  $62.96 \pm 20.21$  for females, respectively. (Table 2) Approximately half (49.7%) of the cohort had been internists, 48.1% were practicing in the north region. Among all doctors, there were 30.8% working in the area of low doctor to population ratio. About two-thirds began their practice before 1995, and over 90% started practice at age below 40.

As for the control for socioeconomic status in the analysis, we used the internists as the reference population and found that the all cause specific SMRs for surgeons and anesthesiologists were marginally elevated with an SMR of 1.15 (95% CI: 0.98-1.34) and 1.62 (95% CI: 0.93-2.64), respectively (Table 3). Among the surgeons, the SMR of “Neoplasm of lymphatic and hematopoietic tissue” was increased but without statistical significance (SMR = 2.17, 95% CI: 0.94 to 4.28). The observed numbers of deaths from malignant neoplasm of digestive organs and peritoneum were significantly lower than corresponding expected values (SMR = 0.54,  $p < 0.05$ , 95% CI: 0.29 to 0.92). Among the anesthesiologists, the SMR of “malignant neoplasm of other and unspecified sites” was significantly increased (SMR = 8.73,  $p < 0.05$ , 95%

1  
2  
3  
4  
5  
6  
7  
8  
9  
10  
11  
12  
13  
14  
15  
16  
17  
18  
19  
20  
21  
22  
23  
24  
25  
26  
27  
28  
29  
30  
31  
32  
33  
34  
35  
36  
37  
38  
39  
40  
41  
42  
43  
44  
45  
46  
47  
48  
49  
50  
51  
52  
53  
54  
55  
56  
57  
58  
59  
60

CI: 1.06 to 31.53), although there were only 2 cases on the observed number.

To further adjust for other risk factors, the Cox regression model was constructed and the results were summarized in Table 4. The anesthesiologists appeared to show the highest hazard ratios (HRs) of 1.97 (95% CI, 1.20 to 3.25), followed by surgeons with a HR of 1.23 (95%CI, 1.04 to 1.46). The HR of ophthalmologists was significantly lower than all other specialists, of which the HR was 0.72 (95%CI, 0.53 to 0.98). In addition, doctors living in the northern region and the central region experienced lower HR's. And doctors who worked in the area with doctor to population ratio below 1:500 showed higher mortality or HR.

The doctors who began practice at an older age had a higher HR of 1.12 (95%CI, 1.12 to 1.13) for every single year increment. Overall, doctors who began practice after the implementation of NHI Program, or the year of 1995, showed a higher HR of 6.17 (95%CI, 4.27 to 8.92).

## Discussion

Based on Cox's Model analysis, we found doctors practicing in southern and eastern regions of Taiwan suffered from statistically significant premature mortality (Table 4), and such a geographic disparity appeared to correspond to the lower life expectancy and higher infant mortality rate in Taiwan (Table 1). To our limited knowledge, this study is the first to show that doctors practicing in the area of a low doctor to population ratio or in the less resourceful regions experienced a higher HR of mortality after adjustment for gender, age of beginning practice, and specialties (Table 4). Because doctors in Taiwan generally have higher earnings than all other segments of professionals and there is no upper limit of retirement age, we have decided to select "internal comparisons" among doctors with the same socioeconomic status, profession-related knowledge and health-related behaviour, to prevent confounding and would leave the effects of mortality to the other two main factors, occupational workload or practice environment. In additional to internists, we have tried to use surgeons as a possibly more homogeneous reference group and the hazard ratios of all covariates are the same except those of specialties, demonstrating a robust result for our inference.

Lowest average income, educational level and life expectancy, and the highest infant mortality rate in Taiwan were found in the eastern region (Table 1). Traditionally, this mountainous region impedes transportation tremendously, and plays a significant role in reduced healthcare accessibility for people, including health care providers themselves. Although the doctor to population ratio has improved since the promulgation of Medical Care Act in 1986 and implementation of NHI in 1995, doctors living in this region still suffer from a higher HR. It may indicate that the health disparity still exists. Moreover, in analyzing the central and southern regions, where similar levels of the average income and the education were found, a

1  
2  
3 significantly increased hazard ratio was detected in the southern region only. As noted  
4  
5 in Table 1, the doctor to population ratio has been consistently found to be lower in  
6  
7 the southern region compared with those of the northern and central regions. These  
8  
9 findings indicate persistent health disparities in different regions of Taiwan, and  
10  
11 suggest that occupational workloads might play some role in view of the increased  
12  
13 mortality of doctors.  
14  
15

16  
17 In a previous study, we found that the overall and cause-specific SMRs of doctors  
18  
19 in Taiwan were less than 0.34 for different specialties<sup>11</sup>, which may have been  
20  
21 confounded by using the general population as the referents for comparison<sup>16</sup>. In this  
22  
23 study, we use internists as the reference population for SMR calculation to minimize  
24  
25 the potential confounding by different socioeconomic states (Table 3). Although no  
26  
27 increased mortality was found among radiologists, pathologists, and psychiatrists, as  
28  
29 reported from other countries<sup>2-4</sup>, we detected significantly increased HRs for surgeons  
30  
31 and anesthesiologists (Table 4). A further analysis only detected slightly elevated  
32  
33 SMR for malignant neoplasm of lymphatic and hematopoietic tissues among surgeons,  
34  
35 which appeared to corroborate the hazards of operation room reported by others<sup>17</sup>.  
36  
37 However, the trend was less apparent because of the small sample size of  
38  
39 anesthesiologists. Since the current mortality data in Taiwan only allowed for coding  
40  
41 single underlying cause of death, it may further decrease the power of detection of  
42  
43 occupational related illnesses.  
44  
45

46  
47 Our study also demonstrated the HR of mortality was higher in the group  
48  
49 beginning their practice since 1995, when the National Health Insurance system was  
50  
51 implemented. This group belonged to a younger generation of doctors, who might  
52  
53 possibly suffer from highly stressed work during their practice<sup>18</sup>. Such a stress might  
54  
55 arise from their clinical training program or the newly implemented health policy.  
56  
57 However, the cohort was established during 1990-2006, which may have imposed a  
58  
59  
60

1  
2  
3 selection of healthy survivors among the doctors. They began their practice before  
4  
5 1995 in comparison with those who entered the workforce after 1995. Thus, more  
6  
7 study is needed to explore the above hypothesis.  
8  
9

10 Several limitations of this study should be noted. Firstly, possible  
11  
12 misclassification of self-claimed specialty may be a source of bias while comparing  
13  
14 the mortality rates among different specialties. For instance, a surgeon shifted to  
15  
16 general practice after retiring from a medical center may result in overestimation of  
17  
18 the practice duration and possible underestimation of the effect of specialty. Thus, the  
19  
20 higher HR's among surgeons and anesthesiologists may need to be further studied for  
21  
22 clarification. Secondly, information was limited about the hospital level and the  
23  
24 locations which the doctor has practiced, i.e., misclassification of the region of  
25  
26 practice without differentiating primary/referral hospital and urban/rural setting. Thus,  
27  
28 we had to assume that it might be a random effect and only lead to the null or  
29  
30 under-estimation.  
31  
32

33  
34 In conclusion, disparities both in the geographic region of doctor's practice and the  
35  
36 ratio of doctor to population regionally are the primary determinants to the HR of  
37  
38 doctor mortality. Thus, we recommend increasing the number of doctors and  
39  
40 improving the practice environment of eastern and southern regions of Taiwan, which  
41  
42 may possibly mitigate the health disparities among doctors and people. Further, more  
43  
44 studies are needed to explore and reduce the potential hazards among workplaces of  
45  
46 anesthesiologists and surgeons in Taiwan.  
47  
48  
49  
50  
51  
52  
53  
54  
55  
56  
57  
58  
59  
60

## Acknowledgements

The authors express sincere appreciation to Taiwan Medical Association (TMA) for the maintenance of the relevant database. We also thank Dr. Fu-Chang Hu for his assistance in data analysis using SAS. The study was partially supported by a grant from the National Science Council of the Executive Yuan, Taiwan (No. NSC 99-2628-B-006-036-MY3). The sponsors had no role in the study design, data collection, data analyses, the interpretation of data, the writing of the report, or the decision to submit the article for publication.

## Contribution statement

The first author, Dr. Tung-Fu Shang, has acquired the dataset, designed the study together with Dr. Wang (the corresponding author), conducted the analysis under the full supervision and discussion with Drs. Chen and Wang, written the first draft, and all three participated in the revision of the later drafts until the final one.

Dr. Shang has access to all the data in the study and takes responsibility for the integrity of the data. Together with all co-authors, we shall be responsible for the accuracy of the data analysis, interpretation of the results.

## Competing interests:

All authors of this manuscript indicate no conflicts of interest and have complied with the Principles of Ethical Practice of Public Health. The Ethics Review Board of our institute (Institute of Occupational Medicine and Industrial Hygiene College of Public Health, National Taiwan University, Taiwan) approved the protocol before the commencement of this study.

## Funding

The study was partially supported by a grant from the National Science Council of the Executive Yuan, Taiwan (No. NSC 99-2628-B-006-036-MY3). The sponsors had no role in the study design, data collection, data analyses, the interpretation of data, the writing of the report, or the decision to submit the article for publication.

For peer review only



## References

1. Alexander BH, Checkoway H, Nagahama SI, Domino KB. Cause-specific mortality risks of anesthesiologists. *Anesthesiology* 2000;93(4):922-30.
2. Rich CL, Pitts FN. Suicide by psychiatrists: a study of medical specialists among 18,730 consecutive physician deaths during a five-year period, 1967-72. *J Clin Psychiatry* 1980;41:261-3.
3. Hall A, Harrington JM, Aw TC. Mortality study of British pathologists. *Am J Ind Med* 1991;20:83-9.
4. Logue JN, Barrick MK, Jessup GL, Jr. Mortality of radiologists and pathologists in the Radiation Registry of Physicians. *Journal of Occupational Medicine* 1986;28(2):91-9.
5. Hill GB, Harvey W. The mortality of dentists. *Br Dent J* 1972;132:179-82.
6. Doll R, Peto R. Mortality among doctors in different occupations. *British Medical Journal* 1977;1(6074):1433-6.
7. Cheng SH, Chiang TL. The Effect of Universal Health Insurance on Health Care Utilization in Taiwan. Results from a Natural Experiment. *JAMA* 1997;278:89-93.
8. Lu JR, Hsiao WC. Does Universal Health Insurance Make Health Care Unaffordable? Lessons from Taiwan. *Health Affairs* 2003;22:77-88.
9. National Health Insurance. Statistical Annual Report of Medical Care. Taipei: The ROC Department of Health; 2003.
10. Department of Health. Taiwan Public Health Report 2009. Taipei: The ROC Department of Health; 2010.
11. Shang TF, Chen PC, Wang JD. Mortality of Doctors in Taiwan, 1990-2006. *Occup Med (Lond)* 2010;60(8).
12. Anand S, Barnighausen T. Human resources and health outcomes: cross-country econometric study. *Lancet* 2004;364:1603-09.
13. Anyangwe SC, Mtonga C. Inequities in the Global Health Workforce: The Greatest Impediment to Health in Sub-Saharan Africa. *Int J Environ Res Public Health* 2007;4:93-100.
14. Högberg U. The World Health Report 2005: "make every mother and child count" - including Africans. *Scand J Public Health* 2005;33:409-11.
15. Division of Health Statistics. Mortality rate by local. Taipei: The ROC Department of Health; 2008.
16. Wang JD, Miettinen OS. Occupational mortality studies: principles of validity. *Scand J Work Environ Health* 1982;8:153-8.
17. Bruce DL, Eide KA, Linde HW, Eckenhoff JE. Causes of death among

- 1  
2  
3  
4  
5  
6  
7  
8  
9  
10  
11  
12  
13  
14  
15  
16  
17  
18  
19  
20  
21  
22  
23  
24  
25  
26  
27  
28  
29  
30  
31  
32  
33  
34  
35  
36  
37  
38  
39  
40  
41  
42  
43  
44  
45  
46  
47  
48  
49  
50  
51  
52  
53  
54  
55  
56  
57  
58  
59  
60
- anesthesiologists: A 20-year survey. *Anesthesiology* 1968;29:565-69.
18. British Medical Association. The morbidity and mortality of the medical profession. A literature review and suggestions for future research. London: British Medical Association; 1993.

For peer review only

**Table 1 -- Geographic disparities in doctors per 10,000 persons, per capita disposable income (US\$), education, infant mortality rate (per 1000 live births), and life expectancy at birth in 1998, 2002, and 2006.**

| Region   | Doctors per 10,000 persons |      |      | Per capita disposable income |        |        | Education <sup>§</sup> |      |      | Infant mortality rate |      |      | Life expectancy |      |      |
|----------|----------------------------|------|------|------------------------------|--------|--------|------------------------|------|------|-----------------------|------|------|-----------------|------|------|
|          | 1998                       | 2002 | 2006 | 1998                         | 2002   | 2006   | 1998                   | 2002 | 2006 | 1998                  | 2002 | 2006 | 1998            | 2002 | 2006 |
| Northern | 14.7                       | 16.5 | 17.4 | 8394.8                       | 8912.6 | 9853.0 | 24.8                   | 30.1 | 36.1 | 6.2                   | 4.9  | 4.4  | 77.4            | 78.6 | 79.5 |
| Central  | 14.1                       | 16.5 | 18.3 | 7044.2                       | 6940.0 | 7817.6 | 18.8                   | 23.2 | 28.6 | 6.9                   | 5.8  | 4.5  | 75.1            | 77.0 | 77.6 |
| Southern | 12.9                       | 14.5 | 16.5 | 6928.8                       | 7157.5 | 7891.2 | 18.4                   | 22.8 | 27.7 | 6.4                   | 5.4  | 4.8  | 74.7            | 76.0 | 76.5 |
| Eastern  | 13.3                       | 15.4 | 18.3 | 6542.2                       | 6683.0 | 7987.6 | 11.8                   | 14.4 | 20.0 | 12.4                  | 8.3  | 7.6  | 70.6            | 72.9 | 73.2 |

<sup>§</sup>**Education:** The percentage of people aged more than 15 attained an education level of college or above

Table 2 -- Characteristics of Taiwan doctors included in the study from 1990 to 2006.

|                                  | Taiwan doctors |                   | Deceased doctors |                   |
|----------------------------------|----------------|-------------------|------------------|-------------------|
|                                  | No. (%)        | mean censored age | No. (%)          | mean age at death |
| <b>Total</b>                     | 37,545 (100)   | 46.41±14.47       | 1686 (100)       | 69.88±14.28       |
| <b>Status</b>                    |                |                   |                  |                   |
| Alive                            | 35,859 (95.5)  | 45.31±13.51       |                  |                   |
| Deceased                         | 1686 (4.5)     |                   |                  | 69.88±14.28       |
| <b>Sex</b>                       |                |                   |                  |                   |
| Male                             | 32,722 (87.2)  | 47.68±14.56       | 1642 (97.4)      | 70.06±14.04       |
| Female                           | 4823 (12.8)    | 37.81±10.30       | 44 (2.6)         | 62.96±20.21       |
| <b>Age of beginning practice</b> |                |                   |                  |                   |
| age<30                           | 29,753 (79.2)  | 43.39±11.99       | 566 (33.6)       | 59.03±14.98       |
| 30≤age<40                        | 5573 (14.8)    | 52.28±14.10       | 472 (28.0)       | 73.81±11.92       |
| age≥40                           | 2219 (5.9)     | 74.24±10.91       | 648 (38.4)       | 76.37±8.62        |
| <b>Specialty</b>                 |                |                   |                  |                   |
| Surgeon                          | 4571 (12.2)    | 45.20±13.20       | 161 (9.5)        | 65.83±14.54       |
| Internist                        | 18,664 (49.7)  | 48.76±15.97       | 1190 (70.1)      | 71.92±12.70       |
| Dermatologist                    | 901 (2.4)      | 43.00±12.92       | 35 (2.1)         | 69.79±16.25       |
| Otolaryngologist                 | 2000 (5.3)     | 44.28±11.99       | 45 (2.7)         | 65.46±14.36       |
| Ophthalmologist                  | 1584 (4.2)     | 44.72±12.33       | 42 (2.5)         | 72.28±19.56       |
| Pathologist                      | 414 (1.1)      | 42.21±12.04       | 5 (0.3)          | 49.78±10.87       |
| Pediatrician                     | 2883 (7.7)     | 42.35±11.59       | 54 (3.2)         | 66.32±17.12       |

|                                |               |             |             |             |
|--------------------------------|---------------|-------------|-------------|-------------|
| Psychiatrist                   | 1214 (3.2)    | 40.37±11.81 | 21 (1.2)    | 61.85±20.52 |
| Radiologist                    | 1076 (2.9)    | 41.59±11.79 | 18 (1.1)    | 63.23±18.18 |
| Obstetrician                   | 2278 (6.1)    | 48.84±12.10 | 85 (5.0)    | 63.48±14.44 |
| Orthopedist                    | 1128 (3.0)    | 43.56±11.07 | 14 (0.8)    | 58.78±18.32 |
| Anesthesiologist               | 832 (2.2)     | 40.91±10.23 | 16 (0.9)    | 45.21±15.67 |
| <b>Region</b>                  |               |             |             |             |
| Northern                       | 18,046 (48.1) | 45.71±14.52 | 659 (39.1)  | 68.90±14.32 |
| Central                        | 7054 (18.8)   | 46.25±13.70 | 300 (17.8)  | 70.04±15.58 |
| Southern                       | 11,376 (30.3) | 47.64±14.81 | 667 (39.6)  | 70.97±13.57 |
| Eastern                        | 1069 (2.8)    | 46.24±14.12 | 60 (3.6)    | 67.67±13.96 |
| <b>Doctor-population ratio</b> |               |             |             |             |
| > 1 : 500                      | 17,185 (45.8) | 45.29±14.34 | 620 (36.8)  | 68.21±15.11 |
| 1 : 700 to 1 : 500             | 6429 (17.1)   | 45.55±14.50 | 285 (16.9)  | 69.71±14.19 |
| 1 : 900 to 1 : 700             | 11,233 (29.9) | 47.91±14.21 | 589 (34.9)  | 70.92±13.61 |
| < 1 : 900                      | 2698 (7.2)    | 51.08±14.53 | 192 (11.4)  | 71.90±13.02 |
| <b>Years of practice</b>       |               |             |             |             |
| Before 1995                    | 24,337 (64.8) | 53.62±12.71 | 1640 (97.3) | 70.60±13.52 |
| After 1995                     | 13,208 (35.2) | 33.13±5.06  | 46 (2.7)    | 44.28±16.86 |

**Table 3 -- The observed number of deaths and cause specific SMRs (standardized mortality ratios) for surgeons and anesthesiologists, using internists of Taiwan as the reference group.**

| Causes of death                                   | Surgeon |      |                    | Anesthesiologist |      |                 |
|---------------------------------------------------|---------|------|--------------------|------------------|------|-----------------|
|                                                   | O       | SMR  | 95%CI <sup>§</sup> | O                | SMR  | 95%CI           |
| <b>All causes</b>                                 | 161     | 1.15 | ( 0.98 - 1.34 )    | 16               | 1.62 | (0.93 - 2.64)   |
| <b>All malignant neoplasm<br/>(MN)</b>            | 37      | 0.84 | ( 0.59 - 1.16 )    | 5                | 1.57 | ( 0.51 - 3.66)  |
| MN of digestive organs and<br>peritoneum          | 13      | 0.54 | ( 0.29 - 0.92 )    | 2                | 1.18 | ( 0.14 - 4.26)  |
| MN of respiratory system                          | 11      | 1.16 | ( 0.58 - 2.07)     | 0                | 0.00 | ( 0.00 - 6.56)  |
| MN of urinary organs                              | 2       | 1.05 | ( 0.13 - 3.79)     | 0                | 0.00 | ( 0.00 - 20.42) |
| Neoplasm of lymphatic and<br>hematopoietic tissue | 8       | 2.17 | ( 0.94 - 4.28)     | 1                | 3.41 | ( 0.09 - 19.03) |
| MN of other and<br>unspecified sites              | 1       | 0.48 | ( 0.01 - 2.68)     | 2                | 8.73 | ( 1.06 - 31.53) |
| <b>Cerebrovascular disease</b>                    | 7       | 0.59 | ( 0.24 - 1.22)     | 3                | 3.95 | ( 0.82 - 11.55) |
| <b>Heart disease</b>                              | 9       | 0.83 | ( 0.38 - 1.57)     | 0                | 0.00 | ( 0.00 - 7.34)  |
| <b>Accidents</b>                                  | 11      | 1.81 | ( 0.90 - 3.24)     | 1                | 1.58 | ( 0.04 - 8.79)  |
| <b>Diabetes mellitus</b>                          | 8       | 1.49 | ( 0.65 - 2.94)     | 1                | 1.84 | ( 0.05 - 10.25) |
| <b>Chronic liver disease</b>                      | 7       | 1.60 | ( 0.64 - 3.30)     | 0                | 0.00 | ( 0.00 - 13.75) |
| <b>Kidney disease</b>                             | 1       | 0.36 | ( 0.01 - 2.01)     | 0                | 0.00 | ( 0.00 - 21.26) |
| <b>Pneumonia</b>                                  | 5       | 0.97 | ( 0.32 - 2.27)     | 0                | 0.00 | ( 0.00 - 12.23) |
| <b>Suicide</b>                                    | 3       | 1.36 | ( 0.28 - 3.98)     | 1                | 3.34 | ( 0.08 - 18.60) |

1  
2  
3  
4  
5  
6  
7  
8  
9  
10  
11  
12  
13  
14  
15  
16  
17  
18  
19  
20  
21  
22  
23  
24  
25  
26  
27  
28  
29  
30  
31  
32  
33  
34  
35  
36  
37  
38  
39  
40  
41  
42  
43  
44  
45  
46  
47  
48  
49  
50  
51  
52  
53  
54  
55  
56  
57  
58  
59  
60

|                             |   |      |                |   |      |                 |
|-----------------------------|---|------|----------------|---|------|-----------------|
| <b>Chronic lung disease</b> | 4 | 2.19 | ( 0.60 - 5.60) | 0 | 0.00 | ( 0.00 -116.04) |
| <b>Hypertensive disease</b> | 2 | 1.45 | ( 0.18 - 5.25) | 0 | 0.00 | ( 0.00 - 30.76) |

<sup>§</sup> CI: confidence interval

For peer review only

**Table 4 -- Hazard ratios with 95% CI (confidence interval) estimated through Cox regression model to control relevant risk factors on mortality among Taiwan doctors from 1990 to 2006.**

| <b>Covariate</b>                 | <b>Hazard ratio</b> | <b>95% CI</b> |
|----------------------------------|---------------------|---------------|
| <b>Age of beginning practice</b> |                     |               |
|                                  | 1.12                | 1.12-1.13     |
| <b>Gender</b>                    |                     |               |
| Female/male                      | 0.76                | 0.56-1.02     |
| <b>Specialty</b>                 |                     |               |
| Dermatologist / Internist        | 1.19                | 0.85-1.67     |
| Otolaryngologist / Internist     | 0.85                | 0.63-1.15     |
| Ophthalmologist / Internist      | 0.72                | 0.53-0.98     |
| Pathologist/ Internist           | 0.81                | 0.33-1.94     |
| Pediatrician / Internist         | 0.91                | 0.69-1.20     |
| Psychiatrist / Internist         | 0.81                | 0.52-1.24     |
| Radiologist / Internist          | 0.87                | 0.55-1.39     |
| Surgeon / Internist              | 1.23                | 1.04-1.46     |
| Obstetrician / Internist         | 1.19                | 0.95-1.50     |
| Orthopedist / Internist          | 0.75                | 0.44-1.27     |
| Anesthesiologists/ Internist     | 1.97                | 1.20-3.25     |
| <b>Region</b>                    |                     |               |
| Central / Northern               | 1.12                | 0.97-1.29     |
| Southern / Northern              | 1.30                | 1.17-1.45     |
| Eastern / Northern               | 1.68                | 1.28-2.20     |
| <b>Doctor-population ratio</b>   |                     |               |



|                               |      |           |
|-------------------------------|------|-----------|
| 1 : 700 to 1 : 500 / >1 : 500 | 1.23 | 1.06-1.42 |
| 1 : 900 to 1 : 700 / >1 : 500 | 1.20 | 1.06-1.34 |
| <1 : 900 / >1 : 500           | 1.18 | 1.00-1.39 |

---

**Year of beginning practice**

---

|                        |      |           |
|------------------------|------|-----------|
| After 1995/ Before1995 | 6.17 | 4.27-8.92 |
|------------------------|------|-----------|

---

For peer review only

**WHAT IS ALREADY KNOWN ON THIS TOPIC**

All factors leading to health disparities are affecting people within respective locality.

**WHAT THIS STUDY ADDS**

All factors leading to health disparities also influence the mortality rates of healthcare providers, including doctors who practiced in such locality.

Increasing the numbers of doctors and/or improving the practice environment may be helpful in reducing the health disparities of both the general public and doctors residing in a region with poor resources.

For peer review only

1  
2  
3 Dear Sir or Madam,  
4  
5

6 Attached please find our revised manuscript entitled “**Disparities in Mortality among**  
7  
8 **Doctors in Taiwan: A 17-year follow-up study of 37,545 Doctors**” (Manuscript ID  
9  
10 bmjopen-2011-000382 R1) for your consideration to be published on your esteemed journal.  
11  
12

13 My colleagues and I are very grateful to your constructive comments and advice. Please  
14  
15 also kindly express our sincere thankfulness and appreciation to all participating reviewers.  
16

17 My research team has a thorough discussion and has made some revision on this version plus  
18  
19 point-to-point responses to every comment that you have made.  
20  
21

22 Thank you. We are looking forward to hearing from you soon.  
23  
24

25  
26 Yours sincerely,  
27  
28

29  
30 Jung-Der Wang M.D.,Sc.D.  
31  
32 Chair Professor  
33  
34 Department of Public Health,

35  
36 National Cheng Kung University College of Medicine  
37  
38 1 University Rd., Tainan 701, Taiwan.  
39  
40 Tel : +886-6-2353535 ext 5600 Fax : +886-6-2359033  
41  
42  
43  
44  
45  
46  
47  
48  
49  
50  
51  
52  
53  
54  
55  
56  
57  
58  
59  
60  
61  
62  
63  
64  
65  
66  
67  
68  
69  
70  
71  
72  
73  
74  
75  
76  
77  
78  
79  
80  
81  
82  
83  
84  
85  
86  
87  
88  
89  
90  
91  
92  
93  
94  
95  
96  
97  
98  
99  
100

## RESPONSE TO THE REVIEWER

### For Reviewer

#### Comment # 1

They choose to keep the large group of internal medicine doctors as the reference in their statistical models, the argument for this being that this is the largest group. However, it is clear from other comments that this is also a very heterogeneous group, so I still maintain that it might be better to use a more homogeneous group for reference, alternatively to choose another contrast function.

**Response:** Thanks for your comments. We have followed your advice and decided to use a more homogeneous group, surgeons, as the referent alternatively in the Cox regression model. The results appear the same (i.e., all hazard ratios of covariates except those of specialties) and summarized in the following table:

**Table. Hazard ratios with 95% CI (confidence interval) estimated through Cox regression model to control relevant risk factors on mortality among Taiwan doctors from 1990 to 2006.**

| Covariate                        | Hazard ratio | 95% CI    |
|----------------------------------|--------------|-----------|
| <b>Age of beginning practice</b> |              |           |
|                                  | 1.12         | 1.12-1.13 |
| <b>Gender</b>                    |              |           |
| Female/male                      | 0.76         | 0.56-1.02 |
| <b>Specialty</b>                 |              |           |
| Internist / Surgeon              | 0.81         | 0.69-0.96 |
| Dermatologist / Surgeon          | 0.97         | 0.67-1.40 |
| Otolaryngologist / Surgeon       | 0.69         | 0.49-0.96 |

|                                   |      |           |
|-----------------------------------|------|-----------|
| Ophthalmologist / Surgeon         | 0.59 | 0.42-0.83 |
| Pathologist/ Surgeon              | 0.65 | 0.27-1.59 |
| Pediatrician / Surgeon            | 0.74 | 0.54-1.01 |
| Psychiatrist / Surgeon            | 0.65 | 0.41-1.03 |
| Radiologist / Surgeon             | 0.71 | 0.43-1.15 |
| Obstetrician / Surgeon            | 0.97 | 0.74-1.26 |
| Orthopedist / Surgeon             | 0.61 | 0.35-1.05 |
| Anesthesiologists/ Surgeon        | 1.60 | 0.96-2.69 |
| <b>Region</b>                     |      |           |
| Central / Northern                | 1.12 | 0.97-1.29 |
| Southern / Northern               | 1.30 | 1.17-1.45 |
| Eastern / Northern                | 1.68 | 1.28-2.20 |
| <b>Doctor-population ratio</b>    |      |           |
| 1 : 700 to 1 : 500 / > 1 : 500    | 1.23 | 1.06-1.42 |
| 1 : 900 to 1 : 700 / > 1 : 500    | 1.20 | 1.06-1.34 |
| < 1 : 900 / > 1 : 500             | 1.18 | 1.00-1.39 |
| <b>Year of beginning practice</b> |      |           |
| After 1995/ Before1995            | 6.17 | 4.27-8.92 |

Please kindly see the revised 1<sup>st</sup> paragraph of the Discussion section, as follows:  
(Please see page 11, ll. 9-17)

(Table 4). Because doctors in Taiwan generally have higher earnings than all other segments of professionals and there is no upper limit of retirement age, we have decided to select “internal comparisons” among doctors with the same socioeconomic status, profession-related knowledge and health-related behaviour, to prevent confounding and would leave the effects of mortality to the other two main factors, occupational workload or practice environment. In additional to internists, we have tried to use surgeons as a possibly more homogeneous reference group and the hazard ratios of all covariates are the same except those of specialties, demonstrating a robust result for our inference.

**Comment # 2**

**I still have problems with understanding how the Taiwanese doctors work in relation to hospitals; are all doctors affiliated with hospitals? Don't you have any "real" general practitioners who only work only in their own "surgery" (to use the UK-expression)? And if so, isn't this a group that should be identified in the statistical modelling?**

**Response:** Again, thanks for your comment. Since 1995, Taiwan has implemented mandatory universal health insurance program with a single-payer system. Bureau of national health insurance only contracts with hospitals or clinics and doctors were only allowed to practice at one contracted hospital or run a private clinic. That is a closed system and it comes up with the lowest administration cost of health care in the world (at less than 2% of the total premium). Generally, surgeons as well as anesthesiologists in Taiwan must choose hospital as a workplace to perform major operations, rather than own a clinic. In other words, we do not have general practitioners who can undertake major operations outside hospitals. And family doctors or general practitioners in Taiwan usually open their clinics after their residency training in hospitals and they are included in the internists group. As my response to your first comment, I have re-run the statistical analysis with surgeons as a more homogeneous reference group and the results appear the same.

STROBE 2007 (v4) Statement—Checklist of items that should be included in reports of cohort studies

| Section/Topic                | Item # | Recommendation                                                                                                                                                                       | Reported on page # |
|------------------------------|--------|--------------------------------------------------------------------------------------------------------------------------------------------------------------------------------------|--------------------|
| Title and abstract           | 1      | (a) Indicate the study’s design with a commonly used term in the title or the abstract                                                                                               | 1-2                |
|                              |        | (b) Provide in the abstract an informative and balanced summary of what was done and what was found                                                                                  | 2                  |
| <b>Introduction</b>          |        |                                                                                                                                                                                      | <b>4-5</b>         |
| Background/rationale         | 2      | Explain the scientific background and rationale for the investigation being reported                                                                                                 | 4                  |
| Objectives                   | 3      | State specific objectives, including any prespecified hypotheses                                                                                                                     | 4-5                |
| <b>Methods</b>               |        |                                                                                                                                                                                      | <b>6-7</b>         |
| Study design                 | 4      | Present key elements of study design early in the paper                                                                                                                              | 6                  |
| Setting                      | 5      | Describe the setting, locations, and relevant dates, including periods of recruitment, exposure, follow-up, and data collection                                                      | 6                  |
| Participants                 | 6      | (a) Give the eligibility criteria, and the sources and methods of selection of participants. Describe methods of follow-up                                                           | 6                  |
|                              |        | (b) For matched studies, give matching criteria and number of exposed and unexposed                                                                                                  | 6                  |
| Variables                    | 7      | Clearly define all outcomes, exposures, predictors, potential confounders, and effect modifiers. Give diagnostic criteria, if applicable                                             | 6-7                |
| Data sources/<br>measurement | 8*     | For each variable of interest, give sources of data and details of methods of assessment (measurement). Describe comparability of assessment methods if there is more than one group | 6-7                |
| Bias                         | 9      | Describe any efforts to address potential sources of bias                                                                                                                            | 6-7                |
| Study size                   | 10     | Explain how the study size was arrived at                                                                                                                                            | 6                  |
| Quantitative variables       | 11     | Explain how quantitative variables were handled in the analyses. If applicable, describe which groupings were chosen and why                                                         | 6-7                |
| Statistical methods          | 12     | (a) Describe all statistical methods, including those used to control for confounding                                                                                                | 6-7                |
|                              |        | (b) Describe any methods used to examine subgroups and interactions                                                                                                                  | 6-7                |
|                              |        | (c) Explain how missing data were addressed                                                                                                                                          | 6                  |
|                              |        | (d) If applicable, explain how loss to follow-up was addressed                                                                                                                       |                    |
|                              |        | (e) Describe any sensitivity analyses                                                                                                                                                |                    |
| <b>Results</b>               |        |                                                                                                                                                                                      | <b>8-9</b>         |

|                          |     |                                                                                                                                                                                                              |       |
|--------------------------|-----|--------------------------------------------------------------------------------------------------------------------------------------------------------------------------------------------------------------|-------|
| Participants             | 13* | (a) Report numbers of individuals at each stage of study—eg numbers potentially eligible, examined for eligibility, confirmed eligible, included in the study, completing follow-up, and analysed            | 8     |
|                          |     | (b) Give reasons for non-participation at each stage                                                                                                                                                         |       |
|                          |     | (c) Consider use of a flow diagram                                                                                                                                                                           |       |
| Descriptive data         | 14* | (a) Give characteristics of study participants (eg demographic, clinical, social) and information on exposures and potential confounders                                                                     | 8     |
|                          |     | (b) Indicate number of participants with missing data for each variable of interest                                                                                                                          | 8     |
|                          |     | (c) Summarise follow-up time (eg, average and total amount)                                                                                                                                                  | 8     |
| Outcome data             | 15* | Report numbers of outcome events or summary measures over time                                                                                                                                               | 8-9   |
| Main results             | 16  | (a) Give unadjusted estimates and, if applicable, confounder-adjusted estimates and their precision (eg, 95% confidence interval). Make clear which confounders were adjusted for and why they were included | 8-9   |
|                          |     | (b) Report category boundaries when continuous variables were categorized                                                                                                                                    | 8-9   |
|                          |     | (c) If relevant, consider translating estimates of relative risk into absolute risk for a meaningful time period                                                                                             |       |
| Other analyses           | 17  | Report other analyses done—eg analyses of subgroups and interactions, and sensitivity analyses                                                                                                               | 8-9   |
| <b>Discussion</b>        |     |                                                                                                                                                                                                              | 10-11 |
| Key results              | 18  | Summarise key results with reference to study objectives                                                                                                                                                     | 10-11 |
| <b>Limitations</b>       |     |                                                                                                                                                                                                              | 11-12 |
| Interpretation           | 20  | Give a cautious overall interpretation of results considering objectives, limitations, multiplicity of analyses, results from similar studies, and other relevant evidence                                   | 11-12 |
| Generalisability         | 21  | Discuss the generalisability (external validity) of the study results                                                                                                                                        | 11-12 |
| <b>Other information</b> |     |                                                                                                                                                                                                              | 13    |
| Funding                  | 22  | Give the source of funding and the role of the funders for the present study and, if applicable, for the original study on which the present article is based                                                | 13    |

\*Give information separately for cases and controls in case-control studies and, if applicable, for exposed and unexposed groups in cohort and cross-sectional studies.

**Note:** An Explanation and Elaboration article discusses each checklist item and gives methodological background and published examples of transparent reporting. The STROBE checklist is best used in conjunction with this article (freely available on the Web sites of PLoS Medicine at <http://www.plosmedicine.org/>, Annals of Internal Medicine at <http://www.annals.org/>, and Epidemiology at <http://www.epidem.com/>). Information on the STROBE Initiative is available at [www.strobe-statement.org](http://www.strobe-statement.org).
